# Supplementary material for: Genetic correlates of psychological responses to the COVID-19 crisis in young adult twins in Great Britain
Source: PubMed Central journal article supplement (PMC7336701; doi:10.21203/rs.3.rs-31853/v1), 2020-05-27
Supplement: NHBRimfeldSupportingInformation.pdf [file NHBRimfeldSupportingInformation.pdf]

**Supporting information – Genetic correlates of psychological responses to the COVID-19 crisis  
in young adult twins in Great Britain**

|                                                                                                                                                                                                                                                                |          |
|----------------------------------------------------------------------------------------------------------------------------------------------------------------------------------------------------------------------------------------------------------------|----------|
| <b>Supplementary Tables .....</b>                                                                                                                                                                                                                              | <b>4</b> |
| 1. Supplementary Table 1. Descriptive statistics at T1 for one twin randomly selected from each pair.....                                                                                                                                                      | 4        |
| 2. Supplementary Table 2. Descriptive statistics at T2 for one twin randomly selected from each pair.....                                                                                                                                                      | 6        |
| 3. Supplementary Table 3. Descriptive statistics for T1 to T2 differences for one twin randomly selected from each pair.....                                                                                                                                   | 9        |
| 4. Supplementary Table 4. Descriptive statistics for T1 for one twin randomly selected from each pair broken down by zygosity. ....                                                                                                                            | 11       |
| 5. Supplementary Table 5. Descriptive statistics for T2 for one twin randomly selected from each pair broken down by zygosity. ....                                                                                                                            | 13       |
| 6. Supplementary Table 6. Descriptive statistics for T1 to T2 differences for one twin randomly selected from each pair broken down by zygosity. ....                                                                                                          | 15       |
| 7. Supplementary Table 7. Descriptive statistics at T1 for the twin that was not randomly selected from each pair in the main analyses. ....                                                                                                                   | 17       |
| 8. Supplementary Table 8. Descriptive statistics at T2 for twin two randomly selected from each pair.....                                                                                                                                                      | 20       |
| 9. Supplementary Table 9. Descriptive statistics for T1 to T2 differences for twin two randomly selected from each pair.....                                                                                                                                   | 22       |
| 10. Supplementary Table 10. Phenotypic correlations between T1 and T2 for the whole sample and split by males and females. ....                                                                                                                                | 25       |
| 11. Supplementary Table 11. Measures, test-retest reliabilities and references. ....                                                                                                                                                                           | 26       |
| 12. Supplementary Table 12. Twin intraclass correlations and Falconer ACE estimates. ....                                                                                                                                                                      | 29       |
| 13. Supplementary Table 13. Twin intraclass correlations and Falconer ACE estimates. ....                                                                                                                                                                      | 30       |
| 14. Supplementary Table 14. Twin intraclass correlations and Falconer ACE estimates. ....                                                                                                                                                                      | 31       |
| 15. Supplementary Table 15. Whole sample model fitting results for univariate analyses of additive genetic (A), shared environmental (C), and non-shared environmental (E) components of variance for variables (95% confidence intervals in parentheses)..... | 32       |
| 16. Supplementary Table 16. Bivariate Cholesky decomposition estimating the aetiology of the association between T1 (A1, C1 and E1) and T2 (A2, C2 and E2), for variable in the relationships theme (95% confidence intervals in parentheses). ....            | 34       |
| 17. Supplementary Table 17. Bivariate Cholesky decomposition estimating the aetiology of the association between T1 (A1, C1 and E1) and T2 (A2, C2 and E2), for variables in the thoughts and attitudes theme (95% confidence intervals in parentheses).....   | 34       |
| 18. Supplementary Table 18. Bivariate Cholesky decomposition estimating the aetiology of the association between T1 (A1, C1 and E1) and T2 (A2, C2 and E2), for variables in the substance use theme (95% confidence intervals in parentheses).....            | 36       |

|                                                                                                                                                                                                                                                                                                           |    |
|-----------------------------------------------------------------------------------------------------------------------------------------------------------------------------------------------------------------------------------------------------------------------------------------------------------|----|
| 19. Supplementary Table 19. Bivariate Cholesky decomposition estimating the aetiology of the association between T1 (A1, C1 and E1) and T2 (A2, C2 and E2), for variables in the wellbeing theme (95% confidence intervals in parentheses). .....                                                         | 36 |
| 20. Supplementary Table 20. Bivariate Cholesky decomposition estimating the aetiology of the association between T1 (A1, C1 and E1) and T2 (A2, C2 and E2), for variables in the behaviours theme (95% confidence intervals in parentheses). .....                                                        | 38 |
| 21. Supplementary Table 21. Bivariate model fit indices .....                                                                                                                                                                                                                                             | 39 |
| 22. Supplementary Table 22. For twins living together: T1 twin intraclass correlations and model fitting results for univariate analyses of additive genetic (A), shared environmental (C), and non-shared environmental (E) components of variance (95% confidence intervals in parentheses).....        | 40 |
| 23. Supplementary Table 23. For twins living together: T2 twin intraclass correlations and model fitting results for univariate analyses of additive genetic (A), shared environmental (C), and non-shared environmental (E) components of variance (95% confidence intervals in parentheses).....        | 42 |
| 24. Supplementary Table 24. For twins living together: T2 change twin intraclass correlations and model fitting results for univariate analyses of additive genetic (A), shared environmental (C), and non-shared environmental (E) components of variance (95% confidence intervals in parentheses)..... | 43 |
| 25. Supplementary Table 25. For twins living apart: T1 twin intraclass correlations and model fitting results for univariate analyses of additive genetic (A), shared environmental (C), and non-shared environmental (E) components of variance (95% confidence intervals in parentheses).....           | 45 |
| 26. Supplementary Table 26. For twins living apart: T2 twin intraclass correlations and model fitting results for univariate analyses of additive genetic (A), shared environmental (C), and non-shared environmental (E) components of variance (95% confidence intervals in parentheses).....           | 46 |
| 27. Supplementary Table 27. For twins living apart: T2 change twin intraclass correlations and model fitting results for univariate analyses of additive genetic (A), shared environmental (C), and non-shared environmental (E) components of variance (95% confidence intervals in parentheses).....    | 48 |
| 28. Supplementary Table 28. Male model fitting results for univariate analyses of additive genetic (A), shared environmental (C), and non-shared environmental (E) components of variance (95% confidence intervals in parentheses). .....                                                                | 50 |
| 29. Supplementary Table 29. Female model fitting results for univariate analyses of additive genetic (A), shared environmental (C), and non-shared environmental (E) components of variance (95% confidence intervals in parentheses). .....                                                              | 51 |
| 30. Supplementary Table 30. Model fitting results for univariate analyses of additive genetic (A), shared environmental (C), and non-shared environmental (E) components of variance (95% confidence intervals in parentheses) for variables corrected for variation in SES. ....                         | 53 |
| 31. Supplementary Table 31. Model fitting results for univariate analyses of additive genetic (A), shared environmental (C), and non-shared environmental (E) components of variance (95% confidence intervals in parentheses) for variables corrected for variation in job/financial difficulties. ....  | 55 |

|                                                                                                                                                                                                                                                                                                                                                      |           |
|------------------------------------------------------------------------------------------------------------------------------------------------------------------------------------------------------------------------------------------------------------------------------------------------------------------------------------------------------|-----------|
| 32. Supplementary Table 32. Model fitting results for univariate analyses of additive genetic (A), shared environmental (C), and non-shared environmental (E) components of variance (95% confidence intervals in parentheses) for variables corrected for variation in garden access during the lockdown. ....                                      | 56        |
| 33. Supplementary Table 33. Model fitting results for univariate analyses of additive genetic (A), shared environmental (C), and non-shared environmental (E) components of variance (95% confidence intervals in parentheses) for variables corrected for variation in living conditions (number of rooms: people in home during the lockdown)..... | 58        |
| 34. Supplementary Table 34. Model fitting results for univariate analyses of additive genetic (A), shared environmental (C), and non-shared environmental (E) components of variance (95% confidence intervals in parentheses) for variables corrected for variation in having been tested or suspected of having COVID-19. ....                     | 59        |
| 35. Supplementary Table 35. Model fitting results for univariate analyses of additive genetic (A), shared environmental (C), and non-shared environmental (E) components of variance for variables (95% confidence intervals in parentheses) corrected for variation in number of COVID-19 symptoms. ....                                            | 60        |
| 36. Supplementary Table 36. Model fitting results for univariate analyses of additive genetic (A), shared environmental (C), and non-shared environmental (E) components of variance for variables (95% confidence intervals in parentheses) for variables corrected for variation in number of COVID-19 symptoms (two or more) vs none. ....        | 62        |
| <b>Supplementary Figures .....</b>                                                                                                                                                                                                                                                                                                                   | <b>64</b> |
| 1. Supplementary Figure 1. Variance in T2 change scores.....                                                                                                                                                                                                                                                                                         | 64        |
| 2. Supplementary Figure 2. Shared environmental ( $r_C$ ) and nonshared environmental correlations ( $r_E$ ). ....                                                                                                                                                                                                                                   | 65        |
| 3. Supplementary Figure 3. The Bivariate Cholesky decomposition.....                                                                                                                                                                                                                                                                                 | 66        |

## Supplementary Tables

**Supplementary Table 1.** Descriptive statistics at T1 for one twin randomly selected from each pair.

| Construct                   | All  |      |       |          |           | Males    |      |       |          |           | Females  |      |       |          |           | ANOVA <sup>a</sup> |          |                       |
|-----------------------------|------|------|-------|----------|-----------|----------|------|-------|----------|-----------|----------|------|-------|----------|-----------|--------------------|----------|-----------------------|
|                             | N    | Min  | Max   | <i>M</i> | <i>SD</i> | <i>n</i> | Min  | Max   | <i>M</i> | <i>SD</i> | <i>n</i> | Min  | Max   | <i>M</i> | <i>SD</i> | Sex                | <i>p</i> | <i>R</i> <sup>2</sup> |
| Love and relationships      | 2548 | 1.00 | 5.00  | 3.57     | 1.21      | 846      | 1.00 | 5.00  | 3.39     | 1.19      | 1702     | 1.00 | 5.00  | 3.66     | 1.21      | 28.09              | <.001    | .01                   |
| Verbal peer victimisation   | 2349 | 0.00 | 8.00  | 2.01     | 2.52      | 765      | 0.00 | 8.00  | 2.43     | 2.73      | 1584     | 0.00 | 8.00  | 1.80     | 2.39      | 29.43              | <.001    | .01                   |
| Cyber peer victimisation    | 2349 | 0.00 | 8.00  | 0.56     | 1.41      | 765      | 0.00 | 8.00  | 0.52     | 1.40      | 1584     | 0.00 | 8.00  | 0.58     | 1.42      | 0.94               | .333     | .00                   |
| Physical peer victimisation | 2349 | 0.00 | 8.00  | 0.19     | 0.79      | 765      | 0.00 | 8.00  | 0.32     | 0.99      | 1584     | 0.00 | 8.00  | 0.12     | 0.66      | 23.75              | <.001    | .01                   |
| Achievement motivation      | 2553 | 0.00 | 16.00 | 10.06    | 2.92      | 849      | 0.00 | 16.00 | 9.88     | 3.16      | 1704     | 0.00 | 16.00 | 10.15    | 2.78      | 4.46               | .035     | .00                   |
| Importance of Relationships | 2553 | 0.00 | 20.00 | 15.84    | 3.59      | 849      | 0.00 | 20.00 | 14.59    | 3.96      | 1704     | 0.00 | 20.00 | 16.47    | 3.22      | 144.17             | <.001    | .06                   |
| Purpose in Life             | 2552 | 1.00 | 5.00  | 3.45     | 0.81      | 849      | 1.00 | 5.00  | 3.38     | 0.84      | 1703     | 1.00 | 5.00  | 3.49     | 0.79      | 9.58               | .002     | .00                   |
| Healthcare                  | 2549 | 1.00 | 5.00  | 4.58     | 0.70      | 847      | 1.00 | 5.00  | 4.48     | 0.79      | 1702     | 1.00 | 5.00  | 4.63     | 0.64      | 21.34              | <.001    | .01                   |
| Community satisfaction      | 2539 | 1.00 | 5.00  | 3.60     | 0.75      | 842      | 1.00 | 5.00  | 3.59     | 0.73      | 1697     | 1.00 | 5.00  | 3.61     | 0.76      | 0.36               | .552     | .00                   |
| Attitudes towards money     | 2490 | 1.00 | 5.00  | 3.05     | 0.91      | 836      | 1.00 | 5.00  | 3.14     | 0.93      | 1654     | 1.00 | 5.00  | 3.00     | 0.90      | 13.90              | <.001    | .01                   |

|                                |      |      |       |      |      |     |      |       |      |      |      |      |       |      |      |        |       |     |
|--------------------------------|------|------|-------|------|------|-----|------|-------|------|------|------|------|-------|------|------|--------|-------|-----|
| Alcohol frequency              | 2283 | 0.00 | 4.00  | 1.90 | 0.99 | 739 | 0.00 | 4.00  | 2.04 | 1.02 | 1544 | 0.00 | 4.00  | 1.83 | 0.97 | 21.00  | <.001 | .01 |
| Alcohol quantity               | 2081 | 0.00 | 4.00  | 2.41 | 1.26 | 683 | 0.00 | 4.00  | 2.41 | 1.27 | 1398 | 0.00 | 4.00  | 2.41 | 1.26 | 0.00   | .963  | .00 |
| Alcohol (frequency x quantity) | 2283 | 0.00 | 16.00 | 4.67 | 3.68 | 739 | 0.00 | 16.00 | 5.01 | 3.86 | 1544 | 0.00 | 16.00 | 4.51 | 3.58 | 8.88   | .003  | .00 |
| Ever smoked                    | 2389 | 0.00 | 1.00  | 0.54 | 0.50 | 771 | 0.00 | 1.00  | 0.53 | 0.50 | 1618 | 0.00 | 1.00  | 0.54 | 0.50 | 0.59   | .444  | .00 |
| Smoking frequency              | 265  | 1.00 | 4.00  | 1.31 | 0.55 | 79  | 1.00 | 3.00  | 1.39 | 0.63 | 186  | 1.00 | 4.00  | 1.27 | 0.52 | 2.17   | .143  | .01 |
| Ever vaped                     | 2392 | 0.00 | 1.00  | 0.24 | 0.43 | 771 | 0.00 | 1.00  | 0.27 | 0.44 | 1621 | 0.00 | 1.00  | 0.22 | 0.42 | 5.48   | .019  | .00 |
| Vaping frequency               | 278  | 1.00 | 6.00  | 2.42 | 2.01 | 106 | 1.00 | 6.00  | 2.76 | 2.13 | 172  | 1.00 | 6.00  | 2.22 | 1.90 | 4.72   | .031  | .02 |
| Ever used cannabis             | 2356 | 0.00 | 1.00  | 0.48 | 0.50 | 752 | 0.00 | 1.00  | 0.52 | 0.50 | 1604 | 0.00 | 1.00  | 0.46 | 0.50 | 6.30   | .012  | .00 |
| Cannabis smoking frequency     | 398  | 1.00 | 5.00  | 1.57 | 0.78 | 164 | 1.00 | 5.00  | 1.71 | 0.89 | 234  | 1.00 | 5.00  | 1.48 | 0.69 | 7.68   | .006  | .02 |
| Conduct problems               | 2522 | 0.00 | 8.00  | 1.51 | 1.24 | 841 | 0.00 | 8.00  | 1.53 | 1.22 | 1681 | 0.00 | 8.00  | 1.50 | 1.25 | 0.37   | .541  | .00 |
| Emotional problems             | 2522 | 0.00 | 10.00 | 3.62 | 2.72 | 841 | 0.00 | 10.00 | 2.66 | 2.45 | 1681 | 0.00 | 10.00 | 4.10 | 2.72 | 180.80 | <.001 | .06 |
| Hyperactivity                  | 2522 | 0.00 | 10.00 | 3.30 | 2.20 | 841 | 0.00 | 10.00 | 3.33 | 2.21 | 1681 | 0.00 | 10.00 | 3.29 | 2.19 | 0.15   | .703  | .00 |
| Peer problems                  | 2522 | 0.00 | 10.00 | 2.15 | 1.83 | 841 | 0.00 | 10.00 | 2.14 | 1.73 | 1681 | 0.00 | 10.00 | 2.16 | 1.88 | 0.14   | .713  | .00 |

|                     |      |      |       |      |      |     |      |       |      |      |      |      |       |      |      |        |       |     |
|---------------------|------|------|-------|------|------|-----|------|-------|------|------|------|------|-------|------|------|--------|-------|-----|
| Prosocial behaviour | 2522 | 0.00 | 10.00 | 7.70 | 1.89 | 841 | 1.00 | 10.00 | 7.01 | 2.01 | 1681 | 0.00 | 10.00 | 8.04 | 1.72 | 160.07 | <.001 | .07 |
| General anxiety     | 2382 | 0.00 | 40.00 | 7.56 | 7.47 | 765 | 0.00 | 40.00 | 5.96 | 6.82 | 1617 | 0.00 | 40.00 | 8.31 | 7.65 | 56.86  | <.001 | .02 |
| Depression          | 2520 | 0.00 | 16.00 | 4.39 | 4.12 | 840 | 0.00 | 16.00 | 3.65 | 3.68 | 1680 | 0.00 | 16.00 | 4.77 | 4.28 | 46.28  | <.001 | .02 |
| Self-harm           | 2371 | 0.00 | 4.00  | 0.21 | 0.70 | 762 | 0.00 | 4.00  | 0.16 | 0.62 | 1609 | 0.00 | 4.00  | 0.23 | 0.73 | 4.85   | .028  | .00 |
| Physical activity   | 2528 | 1.00 | 5.00  | 2.80 | 1.09 | 837 | 1.00 | 5.00  | 2.90 | 1.10 | 1691 | 1.00 | 5.00  | 2.75 | 1.09 | 10.43  | .001  | .00 |
| Media use           | 2522 | 0.00 | 15.00 | 7.63 | 2.12 | 835 | 0.00 | 15.00 | 7.89 | 2.20 | 1687 | 0.00 | 15.00 | 7.51 | 2.07 | 17.27  | <.001 | .01 |
| Volunteering        | 2519 | 0.00 | 8.00  | 2.80 | 2.10 | 840 | 0.00 | 8.00  | 2.64 | 2.03 | 1679 | 0.00 | 8.00  | 2.89 | 2.13 | 8.19   | .004  | .00 |

Note: Raw scores are used.

<sup>a</sup> F and p values are reported with Welch's correction (Welch, 1951) as the assumption of homogeneity of variance was violated for several variables.

**Supplementary Table 2.** Descriptive statistics at T2 for one twin randomly selected from each pair.

| Construct                 | All  |      |      |      |      | Males |      |      |      |      | Females |      |      |      |      | ANOVA <sup>a</sup> |       |                |
|---------------------------|------|------|------|------|------|-------|------|------|------|------|---------|------|------|------|------|--------------------|-------|----------------|
|                           | N    | Min  | Max  | M    | SD   | n     | Min  | Max  | M    | SD   | n       | Min  | Max  | M    | SD   | Sex                | p     | R <sup>2</sup> |
| Love and relationships    | 2042 | 1.00 | 5.00 | 3.68 | 1.09 | 633   | 1.00 | 5.00 | 3.57 | 1.10 | 1409    | 1.00 | 5.00 | 3.73 | 1.08 | 10.61              | .001  | .01            |
| Verbal peer victimisation | 2082 | 0.00 | 8.00 | 0.58 | 1.48 | 646   | 0.00 | 8.00 | 0.87 | 1.85 | 1436    | 0.00 | 8.00 | 0.45 | 1.26 | 22.13              | <.001 | .01            |
| Cyber peer victimisation  | 2082 | 0.00 | 8.00 | 0.10 | 0.55 | 646   | 0.00 | 6.00 | 0.12 | 0.62 | 1436    | 0.00 | 8.00 | 0.09 | 0.52 | 1.32               | .251  | .00            |

|                                |      |      |       |       |      |     |      |       |       |      |      |      |       |       |      |        |       |     |
|--------------------------------|------|------|-------|-------|------|-----|------|-------|-------|------|------|------|-------|-------|------|--------|-------|-----|
| Physical peer victimisation    | 2082 | 0.00 | 8.00  | 0.04  | 0.39 | 646 | 0.00 | 6.00  | 0.05  | 0.48 | 1436 | 0.00 | 8.00  | 0.04  | 0.34 | 0.65   | .421  | .00 |
| Achievement motivation         | 2079 | 0.00 | 16.00 | 8.78  | 3.36 | 644 | 0.00 | 16.00 | 8.85  | 3.46 | 1435 | 0.00 | 16.00 | 8.75  | 3.31 | 0.22   | .642  | .00 |
| Importance of Relationships    | 2081 | 0.00 | 20.00 | 15.42 | 3.71 | 646 | 0.00 | 20.00 | 14.09 | 3.98 | 1435 | 1.00 | 20.00 | 16.03 | 3.41 | 109.80 | <.001 | .06 |
| Purpose in Life                | 2081 | 1.00 | 5.00  | 3.47  | 0.81 | 646 | 1.00 | 5.00  | 3.44  | 0.83 | 1435 | 1.00 | 5.00  | 3.48  | 0.80 | 0.63   | .428  | .00 |
| Healthcare                     | 2081 | 1.00 | 5.00  | 4.79  | 0.59 | 646 | 1.00 | 5.00  | 4.70  | 0.71 | 1435 | 1.00 | 5.00  | 4.84  | 0.51 | 16.23  | <.001 | .01 |
| Community satisfaction         | 2081 | 1.00 | 5.00  | 3.55  | 0.70 | 646 | 1.40 | 5.00  | 3.52  | 0.67 | 1435 | 1.00 | 5.00  | 3.56  | 0.71 | 1.45   | .228  | .00 |
| Attitudes towards money        | 2081 | 1.00 | 5.00  | 3.16  | 0.90 | 646 | 1.00 | 5.00  | 3.27  | 0.94 | 1435 | 1.00 | 5.00  | 3.12  | 0.88 | 9.22   | .002  | .00 |
| Alcohol frequency              | 2070 | 0.00 | 4.00  | 2.00  | 1.27 | 643 | 0.00 | 4.00  | 2.07  | 1.33 | 1427 | 0.00 | 4.00  | 1.96  | 1.24 | 2.15   | .143  | .00 |
| Alcohol quantity               | 1679 | 0.00 | 4.00  | 1.86  | 1.26 | 515 | 0.00 | 4.00  | 2.03  | 1.27 | 1164 | 0.00 | 4.00  | 1.79  | 1.25 | 9.57   | .002  | .01 |
| Alcohol (frequency x quantity) | 2069 | 0.00 | 16.00 | 4.07  | 4.26 | 642 | 0.00 | 16.00 | 4.52  | 4.53 | 1427 | 0.00 | 16.00 | 3.86  | 4.12 | 7.12   | .008  | .00 |
| Ever smoked                    | 2071 | 0.00 | 1.00  | 0.47  | 0.50 | 643 | 0.00 | 1.00  | 0.49  | 0.50 | 1428 | 0.00 | 1.00  | 0.46  | 0.50 | 0.47   | .495  | .00 |
| Smoking frequency              | 266  | 1.00 | 4.00  | 1.33  | 0.61 | 74  | 1.00 | 4.00  | 1.26  | 0.55 | 192  | 1.00 | 4.00  | 1.36  | 0.63 | 0.78   | .379  | .00 |
| Ever vaped                     | 2072 | 0.00 | 1.00  | 0.21  | 0.40 | 643 | 0.00 | 1.00  | 0.25  | 0.43 | 1429 | 0.00 | 1.00  | 0.19  | 0.39 | 7.20   | .007  | .00 |
| Vaping frequency               | 83   | 1.00 | 4.00  | 2.87  | 1.26 | 33  | 1.00 | 4.00  | 2.97  | 1.16 | 50   | 1.00 | 4.00  | 2.80  | 1.33 | 0.43   | .515  | .01 |

|                            |      |      |       |      |      |     |      |       |      |      |      |      |       |      |      |        |       |     |
|----------------------------|------|------|-------|------|------|-----|------|-------|------|------|------|------|-------|------|------|--------|-------|-----|
| Ever used cannabis         | 2050 | 0.00 | 1.00  | 0.47 | 0.50 | 633 | 0.00 | 1.00  | 0.51 | 0.50 | 1417 | 0.00 | 1.00  | 0.46 | 0.50 | 4.08   | .044  | .00 |
| Cannabis smoking frequency | 148  | 1.00 | 5.00  | 1.64 | 1.04 | 56  | 1.00 | 5.00  | 1.73 | 1.18 | 92   | 1.00 | 5.00  | 1.58 | 0.95 | 0.15   | .700  | .00 |
| Conduct problems           | 2069 | 0.00 | 7.00  | 1.51 | 1.19 | 643 | 0.00 | 7.00  | 1.50 | 1.24 | 1426 | 0.00 | 7.00  | 1.52 | 1.17 | 0.93   | .336  | .00 |
| Emotional problems         | 2069 | 0.00 | 10.00 | 3.16 | 2.70 | 643 | 0.00 | 10.00 | 2.03 | 2.29 | 1426 | 0.00 | 10.00 | 3.67 | 2.72 | 199.44 | <.001 | .08 |
| Hyperactivity              | 2069 | 0.00 | 10.00 | 4.22 | 2.26 | 643 | 0.00 | 10.00 | 4.05 | 2.25 | 1426 | 0.00 | 10.00 | 4.30 | 2.26 | 6.32   | .012  | .00 |
| Peer problems              | 2069 | 0.00 | 10.00 | 2.24 | 1.66 | 643 | 0.00 | 8.00  | 2.37 | 1.62 | 1426 | 0.00 | 10.00 | 2.19 | 1.68 | 3.98   | .046  | .00 |
| Prosocial behaviour        | 2069 | 0.00 | 10.00 | 6.90 | 1.95 | 643 | 0.00 | 10.00 | 6.15 | 1.99 | 1426 | 1.00 | 10.00 | 7.24 | 1.84 | 118.18 | <.001 | .06 |
| General anxiety            | 2069 | 0.00 | 40.00 | 8.88 | 7.79 | 643 | 0.00 | 35.00 | 6.42 | 6.68 | 1426 | 0.00 | 40.00 | 9.99 | 8.00 | 108.97 | <.001 | .05 |
| Depression                 | 2069 | 0.00 | 16.00 | 4.51 | 4.01 | 643 | 0.00 | 16.00 | 3.33 | 3.43 | 1426 | 0.00 | 16.00 | 5.03 | 4.14 | 91.36  | <.001 | .04 |
| Self-harm                  | 2044 | 0.00 | 4.00  | 0.06 | 0.32 | 636 | 0.00 | 2.00  | 0.03 | 0.19 | 1408 | 0.00 | 4.00  | 0.07 | 0.37 | 11.70  | .001  | .00 |
| Physical activity          | 2068 | 1.00 | 5.00  | 2.63 | 1.09 | 643 | 1.00 | 5.00  | 2.63 | 1.10 | 1425 | 1.00 | 5.00  | 2.63 | 1.09 | 0.01   | .924  | .00 |
| Media use                  | 2068 | 0.00 | 15.00 | 7.12 | 2.36 | 643 | 0.00 | 15.00 | 7.28 | 2.49 | 1425 | 0.00 | 15.00 | 7.05 | 2.30 | 2.86   | .091  | .00 |
| Volunteering               | 2068 | 0.00 | 8.00  | 1.09 | 1.33 | 643 | 0.00 | 8.00  | 1.03 | 1.36 | 1425 | 0.00 | 8.00  | 1.12 | 1.31 | 2.37   | .124  | .00 |

Note: Raw scores are used.

<sup>a</sup> F and p values are reported with Welch's correction (Welch, 1951) as the assumption of homogeneity of variance was violated for several variables.



**Supplementary Table 3.** Descriptive statistics for T1 to T2 differences for one twin randomly selected from each pair.

| Construct                   | All  |       |      |       |      |      | Males |       |      |       |      |      | Females |       |      |       |      | ANOVA <sup>a</sup> |       |      |                |
|-----------------------------|------|-------|------|-------|------|------|-------|-------|------|-------|------|------|---------|-------|------|-------|------|--------------------|-------|------|----------------|
|                             | N    | Min   | Max  | M     | SD   | d    | n     | Min   | Max  | M     | SD   | d    | n       | Min   | Max  | M     | SD   | d                  | Sex   | p    | R <sup>2</sup> |
| Love and relationships      | 1832 | -4.0  | 4.0  | 0.08  | 1.24 | 0.06 | 539   | -4.0  | 4.0  | 0.16  | 1.24 | 0.13 | 1293    | -4.0  | 4.0  | 0.05  | 1.23 | 0.04               | 3.05  | .081 | .00            |
| Verbal peer victimisation   | 1760 | -8.0  | 8.0  | -1.44 | 2.48 | 0.58 | 516   | -8.0  | 8.0  | -1.62 | 2.76 | 0.59 | 1244    | -8.0  | 8.0  | -1.37 | 2.34 | 0.59               | 3.13  | .077 | .00            |
| Cyber peer victimisation    | 1760 | -8.0  | 5.0  | -0.43 | 1.35 | 0.31 | 516   | -8.0  | 5.0  | -0.35 | 1.38 | 0.25 | 1244    | -8.0  | 5.0  | -0.46 | 1.35 | 0.34               | 2.32  | .128 | .00            |
| Physical peer victimisation | 1760 | -8.0  | 8.0  | -0.13 | 0.83 | 0.15 | 516   | -8.0  | 6.0  | -0.26 | 1.10 | 0.23 | 1244    | -7.0  | 8.0  | -0.07 | 0.67 | 0.11               | 12.05 | .001 | .01            |
| Achievement motivation      | 1872 | -11.0 | 9.0  | -1.32 | 2.79 | 0.47 | 551   | -11.0 | 8.0  | -1.13 | 2.73 | 0.42 | 1321    | -11.0 | 9.0  | -1.39 | 2.81 | 0.50               | 3.51  | .061 | .00            |
| Importance of Relationships | 1872 | -15.0 | 15.0 | -0.49 | 3.11 | 0.16 | 551   | -14.0 | 15.0 | -0.69 | 3.59 | 0.19 | 1321    | -15.0 | 14.0 | -0.40 | 2.88 | 0.14               | 2.70  | .101 | .00            |
| Purpose in Life             | 1871 | -3.8  | 2.8  | 0.01  | 0.65 | 0.01 | 551   | -2.0  | 2.2  | 0.03  | 0.66 | 0.04 | 1320    | -3.8  | 2.8  | 0.00  | 0.64 | 0.00               | 0.67  | .412 | .00            |
| Healthcare                  | 1869 | -4.0  | 4.0  | 0.23  | 0.74 | 0.32 | 550   | -4.0  | 4.0  | 0.22  | 0.79 | 0.28 | 1319    | -4.0  | 4.0  | 0.24  | 0.72 | 0.33               | 0.23  | .629 | .00            |
| Community satisfaction      | 1865 | -3.6  | 3.8  | -0.05 | 0.78 | 0.07 | 551   | -2.4  | 2.4  | -0.07 | 0.75 | 0.09 | 1314    | -3.6  | 3.8  | -0.05 | 0.79 | 0.06               | 0.41  | .522 | .00            |
| Attitudes towards money     | 1831 | -3.0  | 4.0  | 0.12  | 0.99 | 0.12 | 546   | -3.0  | 3.0  | 0.09  | 1.01 | 0.09 | 1285    | -3.0  | 4.0  | 0.13  | 0.98 | 0.13               | 0.49  | .486 | .00            |

|                                |      |       |      |       |      |      |     |       |      |       |      |      |      |       |      |       |      |      |      |        |     |
|--------------------------------|------|-------|------|-------|------|------|-----|-------|------|-------|------|------|------|-------|------|-------|------|------|------|--------|-----|
| Alcohol frequency              | 1692 | -4.0  | 4.0  | 0.21  | 1.10 | 0.19 | 491 | -4.0  | 4.0  | 0.11  | 1.14 | 0.09 | 1201 | -4.0  | 4.0  | 0.25  | 1.08 | 0.23 | 5.26 | .022   | .00 |
| Alcohol quantity               | 1509 | -4.0  | 4.0  | -0.67 | 1.56 | 0.43 | 454 | -4.0  | 4.0  | -0.52 | 1.51 | 0.34 | 1055 | -4.0  | 4.0  | -0.74 | 1.58 | 0.47 | 4.44 | .036   | .00 |
| Alcohol (frequency x quantity) | 1706 | -15.0 | 16.0 | -0.67 | 4.24 | 0.16 | 494 | -12.0 | 12.0 | -0.59 | 4.25 | 0.14 | 1212 | -15.0 | 16.0 | -0.70 | 4.23 | 0.17 | 0.00 | .978   | .00 |
| Ever smoked                    | 1780 | -1.0  | 1.0  | -0.07 | 0.36 | 0.19 | 516 | -1.0  | 1.0  | -0.04 | 0.36 | 0.11 | 1264 | -1.0  | 1.0  | -0.08 | 0.36 | 0.22 | 4.02 | .045   | .00 |
| Smoking frequency              | 134  | -2.0  | 3.0  | 0.11  | 0.63 | 0.18 | 25  | -2.0  | 1.0  | -0.12 | 0.53 | 0.23 | 109  | -1.0  | 3.0  | 0.17  | 0.65 | 0.26 | 5.46 | .024   | .03 |
| Ever vaped                     | 1782 | -1.0  | 1.0  | -0.04 | 0.36 | 0.10 | 516 | -1.0  | 1.0  | -0.04 | 0.37 | 0.10 | 1266 | -1.0  | 1.0  | -0.03 | 0.35 | 0.10 | 0.01 | .915   | .00 |
| Vaping frequency               | 36   | -3.0  | 3.0  | -0.69 | 1.67 | 0.42 | 14  | -3.0  | 3.0  | -1.07 | 1.54 | 0.69 | 22   | -2.0  | 3.0  | -0.45 | 1.74 | 0.26 | 1.24 | .275   | .03 |
| Ever used cannabis             | 1750 | -1.0  | 1.0  | -0.02 | 0.33 | 0.05 | 500 | -1.0  | 1.0  | -0.02 | 0.30 | 0.05 | 1250 | -1.0  | 1.0  | -0.02 | 0.34 | 0.05 | 0.00 | 1<.001 | .00 |
| Cannabis smoking frequency     | 87   | -2.0  | 3.0  | -0.30 | 0.85 | 0.35 | 34  | -2.0  | 1.0  | -0.29 | 0.68 | 0.44 | 53   | -2.0  | 3.0  | -0.30 | 0.95 | 0.32 | 0.00 | .965   | .00 |
| Conduct problems               | 1838 | -7.0  | 5.0  | -0.01 | 1.39 | 0.01 | 545 | -6.0  | 5.0  | -0.06 | 1.39 | 0.04 | 1293 | -7.0  | 5.0  | 0.01  | 1.39 | 0.01 | 1.06 | .304   | .00 |
| Emotional problems             | 1838 | -9.0  | 8.0  | -0.44 | 2.45 | 0.18 | 545 | -8.0  | 7.0  | -0.59 | 2.11 | 0.28 | 1293 | -9.0  | 8.0  | -0.38 | 2.58 | 0.15 | 3.18 | .075   | .00 |
| Hyperactivity                  | 1838 | -7.0  | 8.0  | 0.98  | 2.34 | 0.42 | 545 | -5.0  | 8.0  | 0.83  | 2.23 | 0.37 | 1293 | -7.0  | 8.0  | 1.05  | 2.38 | 0.44 | 3.52 | .061   | .00 |

|                     |      |       |      |       |      |      |     |       |      |       |      |      |      |       |      |       |      |      |       |       |     |
|---------------------|------|-------|------|-------|------|------|-----|-------|------|-------|------|------|------|-------|------|-------|------|------|-------|-------|-----|
| Peer problems       | 1838 | -6.0  | 5.0  | 0.07  | 1.58 | 0.05 | 545 | -5.0  | 4.0  | 0.18  | 1.60 | 0.11 | 1293 | -6.0  | 5.0  | 0.03  | 1.58 | 0.02 | 3.40  | .066  | .00 |
| Prosocial behaviour | 1838 | -8.0  | 8.0  | -0.84 | 1.92 | 0.44 | 545 | -8.0  | 6.0  | -0.89 | 2.03 | 0.44 | 1293 | -7.0  | 8.0  | -0.81 | 1.87 | 0.44 | 0.57  | .450  | .00 |
| General anxiety     | 1774 | -32.0 | 34.0 | 1.38  | 6.90 | 0.20 | 513 | -32.0 | 26.0 | 0.48  | 6.14 | 0.08 | 1261 | -27.0 | 34.0 | 1.74  | 7.15 | 0.24 | 13.88 | <.001 | .01 |
| Depression          | 1837 | -16.0 | 15.0 | 0.20  | 3.76 | 0.05 | 545 | -16.0 | 12.0 | -0.21 | 3.32 | 0.06 | 1292 | -13.0 | 15.0 | 0.37  | 3.92 | 0.09 | 10.51 | .001  | .00 |
| Self-harm           | 1742 | -4.0  | 4.0  | -0.14 | 0.66 | 0.21 | 504 | -4.0  | 2.0  | -0.13 | 0.62 | 0.22 | 1238 | -4.0  | 4.0  | -0.14 | 0.67 | 0.21 | 0.07  | .793  | .00 |
| Physical activity   | 1846 | -4.0  | 4.0  | -0.17 | 1.12 | 0.15 | 545 | -3.5  | 3.0  | -0.28 | 1.08 | 0.26 | 1301 | -4.0  | 4.0  | -0.12 | 1.14 | 0.11 | 8.41  | .004  | .00 |
| Media use           | 1841 | -10.0 | 10.0 | -0.48 | 2.29 | 0.21 | 545 | -10.0 | 6.0  | -0.59 | 2.21 | 0.26 | 1296 | -10.0 | 10.0 | -0.43 | 2.32 | 0.18 | 1.86  | .173  | .00 |
| Volunteering        | 1837 | -8.0  | 6.0  | -1.80 | 2.13 | 0.84 | 545 | -8.0  | 5.0  | -1.77 | 2.10 | 0.84 | 1292 | -8.0  | 6.0  | -1.81 | 2.15 | 0.84 | 0.13  | .715  | .00 |

Note: Raw scores are used.

<sup>a</sup> *F* and *p* values are reported with Welch's correction (Welch, 1951) as the assumption of homogeneity of variance was violated for several variables.

**Supplementary Table 4.** Descriptive statistics for T1 for one twin randomly selected from each pair broken down by zygosity.

| Construct                 | T1  |      |      |      |      |      |      |      |      |      |
|---------------------------|-----|------|------|------|------|------|------|------|------|------|
|                           | MZ  |      |      |      |      | DZ   |      |      |      |      |
|                           | n   | Min  | Max  | M    | SD   | n    | Min  | Max  | M    | SD   |
| Love and relationships    | 987 | 1.00 | 5.00 | 3.60 | 1.18 | 1544 | 1.00 | 5.00 | 3.55 | 1.23 |
| Verbal peer victimisation | 911 | 0.00 | 8.00 | 1.78 | 2.39 | 1423 | 0.00 | 8.00 | 2.15 | 2.59 |
| Cyber peer victimisation  | 911 | 0.00 | 8.00 | 0.52 | 1.35 | 1423 | 0.00 | 8.00 | 0.58 | 1.45 |

|                                |     |      |       |       |      |      |      |       |       |      |
|--------------------------------|-----|------|-------|-------|------|------|------|-------|-------|------|
| Physical peer victimisation    | 911 | 0.00 | 8.00  | 0.16  | 0.73 | 1423 | 0.00 | 8.00  | 0.20  | 0.81 |
| Achievement motivation         | 986 | 0.00 | 16.00 | 10.08 | 2.91 | 1550 | 0.00 | 16.00 | 10.05 | 2.92 |
| Importance of Relationships    | 986 | 0.00 | 20.00 | 15.91 | 3.56 | 1550 | 0.00 | 20.00 | 15.80 | 3.61 |
| Purpose in Life                | 985 | 1.00 | 5.00  | 3.51  | 0.77 | 1550 | 1.00 | 5.00  | 3.42  | 0.83 |
| Healthcare                     | 984 | 1.00 | 5.00  | 4.59  | 0.68 | 1548 | 1.00 | 5.00  | 4.58  | 0.71 |
| Community satisfaction         | 985 | 1.40 | 5.00  | 3.60  | 0.75 | 1537 | 1.00 | 5.00  | 3.60  | 0.75 |
| Attitudes towards money        | 970 | 1.00 | 5.00  | 3.05  | 0.90 | 1504 | 1.00 | 5.00  | 3.05  | 0.92 |
| Alcohol frequency              | 882 | 0.00 | 4.00  | 1.83  | 0.99 | 1388 | 0.00 | 4.00  | 1.94  | 0.99 |
| Alcohol quantity               | 796 | 0.00 | 4.00  | 2.44  | 1.26 | 1274 | 0.00 | 4.00  | 2.39  | 1.27 |
| Alcohol (frequency x quantity) | 882 | 0.00 | 16.00 | 4.57  | 3.69 | 1388 | 0.00 | 16.00 | 4.74  | 3.68 |
| Ever smoked                    | 928 | 0.00 | 1.00  | 0.51  | 0.50 | 1445 | 0.00 | 1.00  | 0.55  | 0.50 |
| Smoking frequency              | 93  | 1.00 | 4.00  | 1.26  | 0.57 | 170  | 1.00 | 3.00  | 1.34  | 0.54 |
| Ever vaped                     | 929 | 0.00 | 1.00  | 0.23  | 0.42 | 1447 | 0.00 | 1.00  | 0.24  | 0.43 |
| Vaping frequency               | 102 | 1.00 | 6.00  | 2.38  | 2.08 | 175  | 1.00 | 6.00  | 2.46  | 1.97 |
| Ever used cannabis             | 915 | 0.00 | 1.00  | 0.45  | 0.50 | 1425 | 0.00 | 1.00  | 0.50  | 0.50 |
| Cannabis smoking frequency     | 143 | 1.00 | 5.00  | 1.50  | 0.73 | 253  | 1.00 | 5.00  | 1.61  | 0.81 |

|                     |     |      |       |      |      |      |      |       |      |      |
|---------------------|-----|------|-------|------|------|------|------|-------|------|------|
| Conduct problems    | 972 | 0.00 | 8.00  | 1.52 | 1.20 | 1536 | 0.00 | 8.00  | 1.51 | 1.27 |
| Emotional problems  | 972 | 0.00 | 10.00 | 3.60 | 2.68 | 1536 | 0.00 | 10.00 | 3.63 | 2.75 |
| Hyperactivity       | 972 | 0.00 | 10.00 | 3.22 | 2.15 | 1536 | 0.00 | 10.00 | 3.35 | 2.23 |
| Peer problems       | 972 | 0.00 | 10.00 | 2.14 | 1.83 | 1536 | 0.00 | 9.00  | 2.16 | 1.84 |
| Prosocial behaviour | 972 | 0.00 | 10.00 | 7.67 | 1.90 | 1536 | 0.00 | 10.00 | 7.72 | 1.88 |
| General anxiety     | 922 | 0.00 | 40.00 | 7.29 | 7.41 | 1444 | 0.00 | 40.00 | 7.74 | 7.52 |
| Depression          | 971 | 0.00 | 16.00 | 4.29 | 4.12 | 1535 | 0.00 | 16.00 | 4.46 | 4.13 |
| Self-harm           | 916 | 0.00 | 4.00  | 0.19 | 0.66 | 1439 | 0.00 | 4.00  | 0.22 | 0.72 |
| Physical activity   | 982 | 1.00 | 5.00  | 2.79 | 1.08 | 1529 | 1.00 | 5.00  | 2.81 | 1.10 |
| Media use           | 980 | 0.00 | 15.00 | 7.55 | 2.11 | 1525 | 0.00 | 15.00 | 7.69 | 2.12 |
| Volunteering        | 970 | 0.00 | 8.00  | 2.81 | 2.10 | 1535 | 0.00 | 8.00  | 2.81 | 2.10 |

Note: Raw scores are used.

**Supplementary Table 5.** Descriptive statistics for T2 for one twin randomly selected from each pair broken down by zygosity.

| Construct                 | T2  |      |      |      |      |      |      |      |      |      |
|---------------------------|-----|------|------|------|------|------|------|------|------|------|
|                           | MZ  |      |      |      |      | DZ   |      |      |      |      |
|                           | n   | Min  | Max  | M    | SD   | n    | Min  | Max  | M    | SD   |
| Love and relationships    | 781 | 1.00 | 5.00 | 3.69 | 1.06 | 1246 | 1.00 | 5.00 | 3.67 | 1.11 |
| Verbal peer victimisation | 797 | 0.00 | 8.00 | 0.53 | 1.38 | 1270 | 0.00 | 8.00 | 0.61 | 1.54 |
| Cyber peer victimisation  | 797 | 0.00 | 5.00 | 0.09 | 0.50 | 1270 | 0.00 | 8.00 | 0.11 | 0.59 |

|                                |     |      |       |       |      |      |      |       |       |      |
|--------------------------------|-----|------|-------|-------|------|------|------|-------|-------|------|
| Physical peer victimisation    | 797 | 0.00 | 6.00  | 0.04  | 0.35 | 1270 | 0.00 | 8.00  | 0.04  | 0.41 |
| Achievement motivation         | 796 | 0.00 | 16.00 | 8.71  | 3.31 | 1268 | 0.00 | 16.00 | 8.84  | 3.39 |
| Importance of Relationships    | 797 | 0.00 | 20.00 | 15.27 | 3.80 | 1269 | 1.00 | 20.00 | 15.51 | 3.65 |
| Purpose in Life                | 797 | 1.00 | 5.00  | 3.53  | 0.77 | 1269 | 1.00 | 5.00  | 3.43  | 0.83 |
| Healthcare                     | 797 | 1.00 | 5.00  | 4.77  | 0.66 | 1269 | 1.00 | 5.00  | 4.81  | 0.54 |
| Community satisfaction         | 797 | 1.40 | 5.00  | 3.54  | 0.68 | 1269 | 1.00 | 5.00  | 3.55  | 0.71 |
| Attitudes towards money        | 797 | 1.00 | 5.00  | 3.14  | 0.88 | 1269 | 1.00 | 5.00  | 3.18  | 0.91 |
| Alcohol frequency              | 792 | 0.00 | 4.00  | 1.93  | 1.26 | 1263 | 0.00 | 4.00  | 2.04  | 1.26 |
| Alcohol quantity               | 633 | 0.00 | 4.00  | 1.83  | 1.25 | 1035 | 0.00 | 4.00  | 1.88  | 1.27 |
| Alcohol (frequency x quantity) | 792 | 0.00 | 16.00 | 3.87  | 4.18 | 1262 | 0.00 | 16.00 | 4.19  | 4.31 |
| Ever smoked                    | 793 | 0.00 | 1.00  | 0.44  | 0.50 | 1263 | 0.00 | 1.00  | 0.49  | 0.50 |
| Smoking frequency              | 87  | 1.00 | 3.00  | 1.21  | 0.49 | 175  | 1.00 | 4.00  | 1.39  | 0.66 |
| Ever vaped                     | 793 | 0.00 | 1.00  | 0.18  | 0.39 | 1264 | 0.00 | 1.00  | 0.22  | 0.41 |
| Vaping frequency               | 35  | 1.00 | 4.00  | 2.69  | 1.32 | 48   | 1.00 | 4.00  | 3.00  | 1.20 |
| Ever used cannabis             | 782 | 0.00 | 1.00  | 0.44  | 0.50 | 1254 | 0.00 | 1.00  | 0.50  | 0.50 |
| Cannabis smoking frequency     | 58  | 1.00 | 4.00  | 1.67  | 1.02 | 87   | 1.00 | 5.00  | 1.61  | 1.08 |

|                     |     |      |       |      |      |      |      |       |      |      |
|---------------------|-----|------|-------|------|------|------|------|-------|------|------|
| Conduct problems    | 793 | 0.00 | 7.00  | 1.51 | 1.11 | 1261 | 0.00 | 7.00  | 1.52 | 1.23 |
| Emotional problems  | 793 | 0.00 | 10.00 | 3.08 | 2.66 | 1261 | 0.00 | 10.00 | 3.20 | 2.72 |
| Hyperactivity       | 793 | 0.00 | 10.00 | 4.06 | 2.18 | 1261 | 0.00 | 10.00 | 4.32 | 2.31 |
| Peer problems       | 793 | 0.00 | 8.00  | 2.25 | 1.64 | 1261 | 0.00 | 10.00 | 2.23 | 1.68 |
| Prosocial behaviour | 793 | 1.00 | 10.00 | 6.84 | 1.98 | 1261 | 0.00 | 10.00 | 6.94 | 1.93 |
| General anxiety     | 793 | 0.00 | 37.00 | 8.25 | 7.36 | 1261 | 0.00 | 40.00 | 9.23 | 7.99 |
| Depression          | 793 | 0.00 | 16.00 | 4.24 | 3.75 | 1261 | 0.00 | 16.00 | 4.64 | 4.13 |
| Self-harm           | 787 | 0.00 | 4.00  | 0.05 | 0.28 | 1242 | 0.00 | 4.00  | 0.06 | 0.35 |
| Physical activity   | 793 | 1.00 | 5.00  | 2.68 | 1.08 | 1260 | 1.00 | 5.00  | 2.60 | 1.10 |
| Media use           | 793 | 0.00 | 15.00 | 7.15 | 2.37 | 1260 | 0.00 | 15.00 | 7.11 | 2.36 |
| Volunteering        | 793 | 0.00 | 8.00  | 1.04 | 1.30 | 1260 | 0.00 | 8.00  | 1.12 | 1.34 |

Note: Raw scores are used.

**Supplementary Table 6.** Descriptive statistics for T1 to T2 differences for one twin randomly selected from each pair broken down by zygosity.

| Construct                   | T2-T1 difference scores |       |      |       |      |       |      |       |      |       |      |       |
|-----------------------------|-------------------------|-------|------|-------|------|-------|------|-------|------|-------|------|-------|
|                             | MZ                      |       |      |       |      |       | DZ   |       |      |       |      |       |
|                             | n                       | Min   | Max  | M     | SD   | $d^a$ | n    | Min   | Max  | M     | SD   | $d^a$ |
| Love and relationships      | 726                     | -4.00 | 4.00 | 0.05  | 1.21 | 0.04  | 1095 | -4.00 | 4.00 | 0.10  | 1.26 | 0.08  |
| Verbal peer victimisation   | 700                     | -8.00 | 8.00 | -1.31 | 2.35 | 0.56  | 1050 | -8.00 | 8.00 | -1.53 | 2.56 | 0.60  |
| Cyber peer victimisation    | 700                     | -8.00 | 5.00 | -0.39 | 1.30 | 0.30  | 1050 | -8.00 | 5.00 | -0.44 | 1.38 | 0.32  |
| Physical peer victimisation | 700                     | -6.00 | 6.00 | -0.11 | 0.75 | 0.15  | 1050 | -8.00 | 8.00 | -0.14 | 0.88 | 0.16  |

|                                |     |        |       |       |      |      |      |        |       |       |      |      |
|--------------------------------|-----|--------|-------|-------|------|------|------|--------|-------|-------|------|------|
| Achievement motivation         | 746 | -9.00  | 8.00  | -1.33 | 2.70 | 0.49 | 1115 | -11.00 | 9.00  | -1.31 | 2.84 | 0.46 |
| Importance of Relationships    | 746 | -14.00 | 14.00 | -0.57 | 3.02 | 0.19 | 1115 | -15.00 | 15.00 | -0.43 | 3.17 | 0.14 |
| Purpose in Life                | 745 | -2.00  | 2.40  | 0.03  | 0.66 | 0.05 | 1115 | -3.80  | 2.80  | -0.01 | 0.64 | 0.01 |
| Healthcare                     | 744 | -4.00  | 4.00  | 0.21  | 0.77 | 0.28 | 1114 | -4.00  | 4.00  | 0.24  | 0.71 | 0.34 |
| Community satisfaction         | 741 | -2.80  | 2.60  | -0.06 | 0.75 | 0.08 | 1113 | -3.60  | 3.80  | -0.05 | 0.79 | 0.06 |
| Attitudes towards money        | 732 | -3.00  | 3.00  | 0.10  | 0.94 | 0.10 | 1089 | -3.00  | 4.00  | 0.13  | 1.03 | 0.13 |
| Alcohol frequency              | 669 | -4.00  | 4.00  | 0.20  | 1.09 | 0.18 | 1014 | -4.00  | 4.00  | 0.21  | 1.10 | 0.19 |
| Alcohol quantity               | 583 | -4.00  | 4.00  | -0.69 | 1.54 | 0.45 | 918  | -4.00  | 4.00  | -0.67 | 1.58 | 0.42 |
| Alcohol (frequency x quantity) | 673 | -15.00 | 16.00 | -0.69 | 4.23 | 0.16 | 1023 | -14.00 | 16.00 | -0.66 | 4.25 | 0.16 |
| Ever smoked                    | 711 | -1.00  | 1.00  | -0.06 | 0.37 | 0.17 | 1058 | -1.00  | 1.00  | -0.07 | 0.36 | 0.20 |
| Smoking frequency              | 48  | -2.00  | 2.00  | 0.06  | 0.60 | 0.10 | 84   | -1.00  | 3.00  | 0.13  | 0.65 | 0.20 |
| Ever vaped                     | 711 | -1.00  | 1.00  | -0.04 | 0.36 | 0.12 | 1060 | -1.00  | 1.00  | -0.03 | 0.36 | 0.08 |
| Vaping frequency               | 17  | -3.00  | 3.00  | -0.71 | 1.61 | 0.44 | 19   | -2.00  | 3.00  | -0.68 | 1.77 | 0.39 |
| Ever used cannabis             | 692 | -1.00  | 1.00  | 0.00  | 0.33 | 0.01 | 1048 | -1.00  | 1.00  | -0.03 | 0.32 | 0.08 |
| Cannabis smoking frequency     | 35  | -2.00  | 2.00  | -0.26 | 0.82 | 0.31 | 52   | -2.00  | 3.00  | -0.33 | 0.88 | 0.37 |
| Conduct problems               | 727 | -6.00  | 4.00  | -0.04 | 1.35 | 0.03 | 1101 | -7.00  | 5.00  | 0.01  | 1.42 | 0.00 |



|                     |     |        |       |       |      |      |      |        |       |       |      |      |
|---------------------|-----|--------|-------|-------|------|------|------|--------|-------|-------|------|------|
| Emotional problems  | 727 | -9.00  | 7.00  | -0.49 | 2.45 | 0.20 | 1101 | -8.00  | 8.00  | -0.42 | 2.45 | 0.17 |
| Hyperactivity       | 727 | -7.00  | 8.00  | 0.92  | 2.30 | 0.40 | 1101 | -7.00  | 8.00  | 1.02  | 2.36 | 0.43 |
| Peer problems       | 727 | -5.00  | 4.00  | 0.13  | 1.60 | 0.08 | 1101 | -6.00  | 5.00  | 0.03  | 1.57 | 0.02 |
| Prosocial behaviour | 727 | -7.00  | 6.00  | -0.82 | 1.91 | 0.43 | 1101 | -8.00  | 8.00  | -0.84 | 1.91 | 0.44 |
| General anxiety     | 707 | -27.00 | 30.00 | 1.02  | 6.96 | 0.15 | 1056 | -32.00 | 34.00 | 1.58  | 6.85 | 0.23 |
| Depression          | 726 | -15.00 | 15.00 | 0.09  | 3.80 | 0.02 | 1101 | -16.00 | 14.00 | 0.24  | 3.70 | 0.06 |
| Self-harm           | 697 | -4.00  | 3.00  | -0.12 | 0.57 | 0.21 | 1034 | -4.00  | 4.00  | -0.15 | 0.71 | 0.22 |
| Physical activity   | 734 | -3.33  | 4.00  | -0.11 | 1.10 | 0.10 | 1101 | -4.00  | 3.50  | -0.21 | 1.13 | 0.19 |
| Media use           | 734 | -10.00 | 10.00 | -0.38 | 2.36 | 0.16 | 1096 | -10.00 | 7.00  | -0.54 | 2.24 | 0.24 |
| Volunteering        | 726 | -8.00  | 5.00  | -1.84 | 2.03 | 0.91 | 1101 | -8.00  | 6.00  | -1.78 | 2.19 | 0.82 |

Note: Raw scores are used.

<sup>a</sup>Cohen's *d* for paired samples are reported.

**Supplementary Table 7.** Descriptive statistics at T1 for the twin that was not randomly selected from each pair in the main analyses.

| Construct                   | All  |      |      |          |           | Males    |      |      |          |           | Females  |      |      |          |           | ANOVA <sup>a</sup> |          |                       |
|-----------------------------|------|------|------|----------|-----------|----------|------|------|----------|-----------|----------|------|------|----------|-----------|--------------------|----------|-----------------------|
|                             | N    | Min  | Max  | <i>M</i> | <i>SD</i> | <i>n</i> | Min  | Max  | <i>M</i> | <i>SD</i> | <i>n</i> | Min  | Max  | <i>M</i> | <i>SD</i> | Sex                | <i>p</i> | <i>R</i> <sup>2</sup> |
| Love and relationships      | 2521 | 1.00 | 5.00 | 3.56     | 1.21      | 612      | 1.00 | 5.00 | 3.56     | 1.13      | 1354     | 1.00 | 5.00 | 3.71     | 1.09      | 23.70              | <.001    | .01                   |
| Verbal peer victimisation   | 2355 | 0.00 | 8.00 | 2.03     | 2.51      | 619      | 0.00 | 8.00 | 0.79     | 1.77      | 1386     | 0.00 | 8.00 | 0.43     | 1.15      | 52.65              | <.001    | .02                   |
| Cyber peer victimisation    | 2354 | 0.00 | 8.00 | 0.54     | 1.34      | 619      | 0.00 | 8.00 | 0.12     | 0.67      | 1386     | 0.00 | 8.00 | 0.10     | 0.56      | 0.34               | .560     | .00                   |
| Physical peer victimisation | 2354 | 0.00 | 8.00 | 0.22     | 0.86      | 618      | 0.00 | 5.00 | 0.04     | 0.31      | 1386     | 0.00 | 6.67 | 0.03     | 0.26      | 40.97              | <.001    | .03                   |

|                                |      |      |       |       |      |     |      |       |       |      |      |      |       |       |      |        |       |     |
|--------------------------------|------|------|-------|-------|------|-----|------|-------|-------|------|------|------|-------|-------|------|--------|-------|-----|
| Achievement motivation         | 2533 | 0.00 | 16.00 | 10.16 | 2.90 | 615 | 0.00 | 16.00 | 9.00  | 3.43 | 1377 | 0.00 | 16.00 | 8.49  | 3.27 | 2.07   | .151  | .00 |
| Importance of Relationships    | 2533 | 0.00 | 20.00 | 16.00 | 3.43 | 614 | 0.00 | 20.00 | 14.59 | 3.90 | 1378 | 0.00 | 20.00 | 15.81 | 3.53 | 101.10 | <.001 | .04 |
| Purpose in Life                | 2532 | 1.00 | 5.00  | 3.45  | 0.81 | 617 | 1.00 | 5.00  | 3.48  | 0.82 | 1380 | 1.00 | 5.00  | 3.52  | 0.76 | 12.06  | .001  | .00 |
| Healthcare                     | 2527 | 1.00 | 5.00  | 4.57  | 0.71 | 617 | 1.00 | 5.00  | 4.71  | 0.69 | 1380 | 1.00 | 5.00  | 4.83  | 0.51 | 32.85  | <.001 | .01 |
| Community satisfaction         | 2509 | 1.00 | 5.00  | 3.62  | 0.75 | 617 | 1.20 | 5.00  | 3.51  | 0.68 | 1380 | 1.00 | 5.00  | 3.58  | 0.70 | 3.38   | .066  | .00 |
| Attitudes towards money        | 2436 | 1.00 | 5.00  | 3.04  | 0.91 | 617 | 1.00 | 5.00  | 3.24  | 0.99 | 1380 | 1.00 | 5.00  | 3.15  | 0.89 | 24.86  | <.001 | .01 |
| Alcohol frequency              | 2295 | 0.00 | 4.00  | 1.91  | 1.01 | 615 | 0.00 | 4.00  | 2.12  | 1.28 | 1378 | 0.00 | 4.00  | 1.95  | 1.22 | 56.10  | <.001 | .02 |
| Alcohol quantity               | 2082 | 0.00 | 4.00  | 2.49  | 1.26 | 507 | 0.00 | 4.00  | 2.12  | 1.26 | 1121 | 0.00 | 4.00  | 1.76  | 1.21 | 13.17  | <.001 | .01 |
| Alcohol (frequency x quantity) | 2294 | 0.00 | 16.00 | 4.90  | 3.87 | 614 | 0.00 | 16.00 | 4.77  | 4.46 | 1377 | 0.00 | 16.00 | 3.70  | 3.88 | 47.12  | <.001 | .02 |
| Ever smoked                    | 2389 | 0.00 | 1.00  | 0.56  | 0.50 | 613 | 0.00 | 1.00  | 0.51  | 0.50 | 1370 | 0.00 | 1.00  | 0.45  | 0.50 | 2.62   | .106  | .00 |
| Smoking frequency              | 302  | 1.00 | 4.00  | 1.30  | 0.52 | 79  | 1.00 | 3.00  | 1.29  | 0.54 | 180  | 1.00 | 3.00  | 1.27  | 0.53 | 1.73   | .190  | .01 |
| Ever vaped                     | 2388 | 0.00 | 1.00  | 0.25  | 0.43 | 614 | 0.00 | 1.00  | 0.26  | 0.44 | 1371 | 0.00 | 1.00  | 0.18  | 0.38 | 16.39  | <.001 | .01 |
| Vaping frequency               | 303  | 1.00 | 6.00  | 2.38  | 1.97 | 36  | 2.00 | 4.00  | 3.50  | 0.78 | 43   | 1.00 | 4.00  | 2.77  | 1.29 | 2.16   | .143  | .01 |

|                            |      |      |       |      |      |     |      |       |      |      |      |      |       |      |      |        |       |     |
|----------------------------|------|------|-------|------|------|-----|------|-------|------|------|------|------|-------|------|------|--------|-------|-----|
| Ever used cannabis         | 2364 | 0.00 | 1.00  | 0.49 | 0.50 | 609 | 0.00 | 1.00  | 0.54 | 0.50 | 1361 | 0.00 | 1.00  | 0.42 | 0.49 | 24.86  | <.001 | .01 |
| Cannabis smoking frequency | 415  | 1.00 | 5.00  | 1.49 | 0.71 | 50  | 1.00 | 5.00  | 1.74 | 1.01 | 66   | 1.00 | 5.00  | 1.45 | 0.77 | 4.92   | .027  | .01 |
| Conduct problems           | 2503 | 0.00 | 9.00  | 1.50 | 1.28 | 615 | 0.00 | 6.00  | 1.43 | 1.07 | 1374 | 0.00 | 7.00  | 1.47 | 1.21 | 9.37   | .002  | .00 |
| Emotional problems         | 2503 | 0.00 | 10.00 | 3.59 | 2.67 | 615 | 0.00 | 10.00 | 2.09 | 2.33 | 1374 | 0.00 | 10.00 | 3.49 | 2.62 | 121.61 | <.001 | .04 |
| Hyperactivity              | 2503 | 0.00 | 10.00 | 3.20 | 2.15 | 615 | 0.00 | 10.00 | 4.00 | 2.31 | 1374 | 0.00 | 10.00 | 4.12 | 2.14 | 14.58  | <.001 | .01 |
| Peer problems              | 2503 | 0.00 | 10.00 | 2.14 | 1.79 | 615 | 0.00 | 10.00 | 2.36 | 1.58 | 1374 | 0.00 | 9.00  | 2.14 | 1.68 | 0.02   | .904  | .00 |
| Prosocial behaviour        | 2503 | 0.00 | 10.00 | 7.71 | 1.84 | 615 | 0.00 | 10.00 | 6.17 | 2.09 | 1374 | 1.00 | 10.00 | 7.30 | 1.89 | 133.50 | <.001 | .05 |
| General anxiety            | 2386 | 0.00 | 40.00 | 7.40 | 7.36 | 615 | 0.00 | 37.00 | 6.19 | 6.47 | 1374 | 0.00 | 40.00 | 9.53 | 7.54 | 60.90  | <.001 | .02 |
| Depression                 | 2502 | 0.00 | 16.00 | 4.45 | 4.11 | 615 | 0.00 | 16.00 | 3.33 | 3.36 | 1374 | 0.00 | 16.00 | 4.59 | 4.04 | 26.14  | <.001 | .01 |
| Self-harm                  | 2383 | 0.00 | 4.00  | 0.19 | 0.66 | 605 | 0.00 | 4.00  | 0.02 | 0.21 | 1363 | 0.00 | 4.00  | 0.04 | 0.26 | 18.63  | <.001 | .01 |
| Physical activity          | 2492 | 1.00 | 5.00  | 2.83 | 1.06 | 615 | 1.00 | 5.00  | 2.61 | 1.12 | 1371 | 1.00 | 5.00  | 2.68 | 1.09 | 32.93  | <.001 | .01 |
| Media use                  | 2481 | 0.00 | 15.00 | 7.63 | 2.12 | 615 | 0.00 | 15.00 | 7.21 | 2.45 | 1371 | 0.00 | 14.00 | 6.87 | 2.24 | 40.44  | <.001 | .02 |
| Volunteering               | 2502 | 0.00 | 8.00  | 2.87 | 2.10 | 615 | 0.00 | 8.00  | 1.00 | 1.27 | 1371 | 0.00 | 8.00  | 1.15 | 1.31 | 4.11   | .043  | .00 |

Note: Raw scores are used.

<sup>a</sup> F and p values are reported with Welch's correction (Welch, 1951) as the assumption of homogeneity of variance was violated for several variables.

**Supplementary Table 8.** Descriptive statistics at T2 for twin two randomly selected from each pair.

| Construct                   | All  |      |       |       |      | Males |      |       |       |      | Females |      |       |       |      | ANOVA <sup>a</sup> |       |                |
|-----------------------------|------|------|-------|-------|------|-------|------|-------|-------|------|---------|------|-------|-------|------|--------------------|-------|----------------|
|                             | N    | Min  | Max   | M     | SD   | n     | Min  | Max   | M     | SD   | n       | Min  | Max   | M     | SD   | Sex                | p     | R <sup>2</sup> |
| Love and relationships      | 1966 | 1.00 | 5.00  | 3.66  | 1.10 | 612   | 1.00 | 5.00  | 3.56  | 1.13 | 1354    | 1.00 | 5.00  | 3.71  | 1.09 | 7.37               | .007  | .00            |
| Verbal peer victimisation   | 2005 | 0.00 | 8.00  | 0.54  | 1.38 | 619   | 0.00 | 8.00  | 0.79  | 1.77 | 1386    | 0.00 | 8.00  | 0.43  | 1.15 | 20.60              | <.001 | .01            |
| Cyber peer victimisation    | 2005 | 0.00 | 8.00  | 0.11  | 0.60 | 619   | 0.00 | 8.00  | 0.12  | 0.67 | 1386    | 0.00 | 8.00  | 0.10  | 0.56 | 0.71               | .400  | .00            |
| Physical peer victimisation | 2004 | 0.00 | 6.67  | 0.03  | 0.28 | 618   | 0.00 | 5.00  | 0.04  | 0.31 | 1386    | 0.00 | 6.67  | 0.03  | 0.26 | 0.43               | .512  | .00            |
| Achievement motivation      | 1992 | 0.00 | 16.00 | 8.64  | 3.33 | 615   | 0.00 | 16.00 | 9.00  | 3.43 | 1377    | 0.00 | 16.00 | 8.49  | 3.27 | 9.77               | .002  | .01            |
| Importance of Relationships | 1992 | 0.00 | 20.00 | 15.43 | 3.69 | 614   | 0.00 | 20.00 | 14.59 | 3.90 | 1378    | 0.00 | 20.00 | 15.81 | 3.53 | 44.23              | <.001 | .02            |
| Purpose in Life             | 1997 | 1.00 | 5.00  | 3.51  | 0.78 | 617   | 1.00 | 5.00  | 3.48  | 0.82 | 1380    | 1.00 | 5.00  | 3.52  | 0.76 | 1.29               | .257  | .00            |
| Healthcare                  | 1997 | 1.00 | 5.00  | 4.80  | 0.58 | 617   | 1.00 | 5.00  | 4.71  | 0.69 | 1380    | 1.00 | 5.00  | 4.83  | 0.51 | 16.61              | <.001 | .01            |
| Community satisfaction      | 1997 | 1.00 | 5.00  | 3.56  | 0.69 | 617   | 1.20 | 5.00  | 3.51  | 0.68 | 1380    | 1.00 | 5.00  | 3.58  | 0.70 | 4.29               | .039  | .00            |
| Attitudes towards money     | 1997 | 1.00 | 5.00  | 3.18  | 0.92 | 617   | 1.00 | 5.00  | 3.24  | 0.99 | 1380    | 1.00 | 5.00  | 3.15  | 0.89 | 4.56               | .033  | .00            |
| Alcohol frequency           | 1993 | 0.00 | 4.00  | 2.00  | 1.24 | 615   | 0.00 | 4.00  | 2.12  | 1.28 | 1378    | 0.00 | 4.00  | 1.95  | 1.22 | 7.91               | .005  | .00            |

|                                |      |      |       |      |      |     |      |       |      |      |      |      |       |      |      |        |       |     |
|--------------------------------|------|------|-------|------|------|-----|------|-------|------|------|------|------|-------|------|------|--------|-------|-----|
| Alcohol quantity               | 1628 | 0.00 | 4.00  | 1.87 | 1.24 | 507 | 0.00 | 4.00  | 2.12 | 1.26 | 1121 | 0.00 | 4.00  | 1.76 | 1.21 | 28.90  | <.001 | .02 |
| Alcohol (frequency x quantity) | 1991 | 0.00 | 16.00 | 4.03 | 4.10 | 614 | 0.00 | 16.00 | 4.77 | 4.46 | 1377 | 0.00 | 16.00 | 3.70 | 3.88 | 26.21  | <.001 | .01 |
| Ever smoked                    | 1983 | 0.00 | 1.00  | 0.47 | 0.50 | 613 | 0.00 | 1.00  | 0.51 | 0.50 | 1370 | 0.00 | 1.00  | 0.45 | 0.50 | 4.53   | .033  | .00 |
| Smoking frequency              | 259  | 1.00 | 3.00  | 1.28 | 0.53 | 79  | 1.00 | 3.00  | 1.29 | 0.54 | 180  | 1.00 | 3.00  | 1.27 | 0.53 | 0.07   | .793  | .00 |
| Ever vaped                     | 1985 | 0.00 | 1.00  | 0.20 | 0.40 | 614 | 0.00 | 1.00  | 0.26 | 0.44 | 1371 | 0.00 | 1.00  | 0.18 | 0.38 | 16.82  | <.001 | .01 |
| Vaping frequency               | 79   | 1.00 | 4.00  | 3.10 | 1.14 | 36  | 2.00 | 4.00  | 3.50 | 0.78 | 43   | 1.00 | 4.00  | 2.77 | 1.29 | 9.71   | .003  | .10 |
| Ever used cannabis             | 1970 | 0.00 | 1.00  | 0.46 | 0.50 | 609 | 0.00 | 1.00  | 0.54 | 0.50 | 1361 | 0.00 | 1.00  | 0.42 | 0.49 | 22.70  | <.001 | .01 |
| Cannabis smoking frequency     | 116  | 1.00 | 5.00  | 1.58 | 0.89 | 50  | 1.00 | 5.00  | 1.74 | 1.01 | 66   | 1.00 | 5.00  | 1.45 | 0.77 | 2.79   | .098  | .03 |
| Conduct problems               | 1989 | 0.00 | 7.00  | 1.46 | 1.17 | 615 | 0.00 | 6.00  | 1.43 | 1.07 | 1374 | 0.00 | 7.00  | 1.47 | 1.21 | 0.43   | .513  | .00 |
| Emotional problems             | 1989 | 0.00 | 10.00 | 3.06 | 2.61 | 615 | 0.00 | 10.00 | 2.09 | 2.33 | 1374 | 0.00 | 10.00 | 3.49 | 2.62 | 141.97 | <.001 | .06 |
| Hyperactivity                  | 1989 | 0.00 | 10.00 | 4.08 | 2.19 | 615 | 0.00 | 10.00 | 4.00 | 2.31 | 1374 | 0.00 | 10.00 | 4.12 | 2.14 | 1.20   | .273  | .00 |
| Peer problems                  | 1989 | 0.00 | 10.00 | 2.21 | 1.65 | 615 | 0.00 | 10.00 | 2.36 | 1.58 | 1374 | 0.00 | 9.00  | 2.14 | 1.68 | 8.02   | .005  | .00 |
| Prosocial behaviour            | 1989 | 0.00 | 10.00 | 6.95 | 2.03 | 615 | 0.00 | 10.00 | 6.17 | 2.09 | 1374 | 1.00 | 10.00 | 7.30 | 1.89 | 131.69 | <.001 | .07 |

|                   |      |      |       |      |      |     |      |       |      |      |      |      |       |      |      |        |       |     |
|-------------------|------|------|-------|------|------|-----|------|-------|------|------|------|------|-------|------|------|--------|-------|-----|
| General anxiety   | 1989 | 0.00 | 40.00 | 8.50 | 7.39 | 615 | 0.00 | 37.00 | 6.19 | 6.47 | 1374 | 0.00 | 40.00 | 9.53 | 7.54 | 101.61 | <.001 | .04 |
| Depression        | 1989 | 0.00 | 16.00 | 4.20 | 3.89 | 615 | 0.00 | 16.00 | 3.33 | 3.36 | 1374 | 0.00 | 16.00 | 4.59 | 4.04 | 52.86  | <.001 | .02 |
| Self-harm         | 1968 | 0.00 | 4.00  | 0.04 | 0.24 | 605 | 0.00 | 4.00  | 0.02 | 0.21 | 1363 | 0.00 | 4.00  | 0.04 | 0.26 | 4.93   | .027  | .00 |
| Physical activity | 1986 | 1.00 | 5.00  | 2.66 | 1.10 | 615 | 1.00 | 5.00  | 2.61 | 1.12 | 1371 | 1.00 | 5.00  | 2.68 | 1.09 | 1.90   | .169  | .00 |
| Media use         | 1986 | 0.00 | 15.00 | 6.98 | 2.32 | 615 | 0.00 | 15.00 | 7.21 | 2.45 | 1371 | 0.00 | 14.00 | 6.87 | 2.24 | 8.34   | .004  | .00 |
| Volunteering      | 1986 | 0.00 | 8.00  | 1.10 | 1.30 | 615 | 0.00 | 8.00  | 1.00 | 1.27 | 1371 | 0.00 | 8.00  | 1.15 | 1.31 | 5.95   | .015  | .00 |

<sup>a</sup> *F* and *p* values are reported with Welch's correction (Welch, 1951) as the assumption of homogeneity of variance was violated for several variables.

**Supplementary Table 9.** Descriptive statistics for T1 to T2 differences for twin two randomly selected from each pair.

| Construct                   | All  |       |      |          |           |          | Males    |       |      |          |           |          | Females  |       |      |          |           |          | ANOVA <sup>a</sup> |          |                       |
|-----------------------------|------|-------|------|----------|-----------|----------|----------|-------|------|----------|-----------|----------|----------|-------|------|----------|-----------|----------|--------------------|----------|-----------------------|
|                             | N    | Min   | Max  | <i>M</i> | <i>SD</i> | <i>d</i> | <i>n</i> | Min   | Max  | <i>M</i> | <i>SD</i> | <i>d</i> | <i>n</i> | Min   | Max  | <i>M</i> | <i>SD</i> | <i>d</i> | Sex                | <i>p</i> | <i>R</i> <sup>2</sup> |
| Love and relationships      | 1853 | -4.00 | 4.00 | 0.07     | 1.20      | 0.06     | 573      | -3.33 | 4.00 | 0.13     | 1.24      | 0.10     | 1280     | -4.00 | 4.00 | 0.04     | 1.19      | 0.04     | 1.93               | .165     | .00                   |
| Verbal peer victimisation   | 1778 | -8.00 | 8.00 | -1.44    | 2.44      | 0.59     | 536      | -8.00 | 8.00 | -1.70    | 2.68      | 0.63     | 1242     | -8.00 | 8.00 | -1.33    | 2.31      | 0.57     | 7.68               | .006     | .00                   |
| Cyber peer victimisation    | 1778 | -8.00 | 8.00 | -0.40    | 1.31      | 0.30     | 536      | -8.00 | 8.00 | -0.34    | 1.36      | 0.25     | 1242     | -8.00 | 6.00 | -0.42    | 1.28      | 0.33     | 1.43               | .232     | .00                   |
| Physical peer victimisation | 1776 | -7.00 | 5.00 | -0.17    | 0.84      | 0.21     | 535      | -6.00 | 5.00 | -0.35    | 1.18      | 0.29     | 1241     | -7.00 | 3.00 | -0.10    | 0.62      | 0.15     | 21.78              | <.001    | .02                   |

|                                |      |        |       |       |      |      |     |        |       |       |      |      |      |        |       |       |      |      |       |       |     |
|--------------------------------|------|--------|-------|-------|------|------|-----|--------|-------|-------|------|------|------|--------|-------|-------|------|------|-------|-------|-----|
| Achievement motivation         | 1875 | -14.00 | 10.00 | -1.52 | 2.93 | 0.52 | 577 | -12.00 | 10.00 | -1.35 | 2.97 | 0.46 | 1298 | -14.00 | 8.00  | -1.59 | 2.91 | 0.55 | 2.60  | .107  | .00 |
| Importance of Relationships    | 1875 | -16.00 | 13.00 | -0.61 | 3.06 | 0.20 | 576 | -13.00 | 10.00 | -0.50 | 3.38 | 0.15 | 1299 | -16.00 | 13.00 | -0.66 | 2.91 | 0.23 | 0.95  | .330  | .00 |
| Purpose in Life                | 1879 | -2.40  | 2.80  | 0.04  | 0.67 | 0.06 | 579 | -2.20  | 2.40  | 0.09  | 0.70 | 0.12 | 1300 | -2.40  | 2.80  | 0.02  | 0.65 | 0.03 | 3.45  | .064  | .00 |
| Healthcare                     | 1877 | -4.00  | 4.00  | 0.21  | 0.73 | 0.28 | 578 | -4.00  | 4.00  | 0.26  | 0.80 | 0.32 | 1299 | -4.00  | 4.00  | 0.18  | 0.70 | 0.26 | 3.57  | .059  | .00 |
| Community satisfaction         | 1873 | -3.00  | 3.60  | -0.07 | 0.76 | 0.10 | 574 | -2.80  | 2.20  | -0.05 | 0.74 | 0.07 | 1299 | -3.00  | 3.60  | -0.08 | 0.77 | 0.11 | 0.69  | .406  | .00 |
| Attitudes towards money        | 1823 | -4.00  | 4.00  | 0.16  | 1.02 | 0.15 | 555 | -4.00  | 4.00  | 0.09  | 1.16 | 0.07 | 1268 | -3.00  | 3.00  | 0.19  | 0.94 | 0.20 | 3.15  | .076  | .00 |
| Alcohol frequency              | 1715 | -4.00  | 4.00  | 0.20  | 1.05 | 0.19 | 518 | -4.00  | 3.00  | 0.06  | 1.04 | 0.05 | 1197 | -4.00  | 4.00  | 0.26  | 1.05 | 0.25 | 14.25 | <.001 | .01 |
| Alcohol quantity               | 1403 | -4.00  | 4.00  | -0.56 | 1.45 | 0.39 | 432 | -4.00  | 4.00  | -0.51 | 1.48 | 0.34 | 971  | -4.00  | 4.00  | -0.58 | 1.43 | 0.41 | 0.78  | .378  | .00 |
| Alcohol (frequency x quantity) | 1714 | -16.00 | 16.00 | -0.58 | 4.00 | 0.14 | 517 | -16.00 | 13.00 | -0.76 | 4.29 | 0.18 | 1197 | -16.00 | 16.00 | -0.50 | 3.87 | 0.13 | 1.46  | .228  | .00 |
| Ever smoked                    | 1788 | -1.00  | 1.00  | -0.08 | 0.37 | 0.22 | 539 | -1.00  | 1.00  | -0.06 | 0.34 | 0.19 | 1249 | -1.00  | 1.00  | -0.09 | 0.38 | 0.24 | 2.15  | .143  | .00 |
| Smoking frequency              | 154  | -1.00  | 2.00  | 0.04  | 0.55 | 0.07 | 48  | -1.00  | 1.00  | 0.02  | 0.64 | 0.03 | 106  | -1.00  | 2.00  | 0.05  | 0.50 | 0.09 | 0.06  | .801  | .00 |
| Ever vaped                     | 1791 | -1.00  | 1.00  | -0.04 | 0.36 | 0.12 | 540 | -1.00  | 1.00  | -0.06 | 0.38 | 0.16 | 1251 | -1.00  | 1.00  | -0.03 | 0.35 | 0.10 | 1.95  | .163  | .00 |

|                            |      |        |       |       |      |      |     |        |       |       |      |      |      |        |       |       |      |      |       |       |     |
|----------------------------|------|--------|-------|-------|------|------|-----|--------|-------|-------|------|------|------|--------|-------|-------|------|------|-------|-------|-----|
| Vaping frequency           | 52   | -5.00  | 3.00  | -0.67 | 2.02 | 0.33 | 23  | -4.00  | 3.00  | -0.70 | 1.77 | 0.39 | 29   | -5.00  | 3.00  | -0.66 | 2.22 | 0.29 | 0.01  | .942  | .00 |
| Ever used cannabis         | 1757 | -1.00  | 1.00  | -0.02 | 0.34 | 0.05 | 528 | -1.00  | 1.00  | -0.02 | 0.33 | 0.06 | 1229 | -1.00  | 1.00  | -0.02 | 0.35 | 0.04 | 0.04  | .841  | .00 |
| Cannabis smoking frequency | 74   | -2.00  | 4.00  | -0.07 | 0.96 | 0.07 | 33  | -2.00  | 4.00  | 0.15  | 1.20 | 0.13 | 41   | -2.00  | 1.00  | -0.24 | 0.66 | 0.37 | 2.87  | .097  | .04 |
| Conduct problems           | 1858 | -8.00  | 6.00  | -0.01 | 1.43 | 0.01 | 571 | -8.00  | 4.00  | -0.16 | 1.44 | 0.11 | 1287 | -6.00  | 6.00  | 0.06  | 1.43 | 0.04 | 8.99  | .003  | .00 |
| Emotional problems         | 1858 | -9.00  | 10.00 | -0.55 | 2.51 | 0.22 | 571 | -8.00  | 7.00  | -0.69 | 2.38 | 0.29 | 1287 | -9.00  | 10.00 | -0.48 | 2.57 | 0.19 | 2.80  | .095  | .00 |
| Hyperactivity              | 1858 | -7.00  | 9.00  | 1.01  | 2.31 | 0.43 | 571 | -7.00  | 7.00  | 0.72  | 2.34 | 0.31 | 1287 | -6.00  | 9.00  | 1.13  | 2.29 | 0.49 | 12.52 | <.001 | .01 |
| Peer problems              | 1858 | -7.00  | 5.00  | 0.09  | 1.62 | 0.06 | 571 | -5.00  | 5.00  | 0.29  | 1.63 | 0.18 | 1287 | -7.00  | 5.00  | 0.01  | 1.61 | 0.00 | 11.97 | .001  | .01 |
| Prosocial behaviour        | 1858 | -8.00  | 8.00  | -0.81 | 1.96 | 0.41 | 571 | -8.00  | 8.00  | -1.00 | 2.09 | 0.48 | 1287 | -8.00  | 6.00  | -0.73 | 1.89 | 0.39 | 6.86  | .009  | .00 |
| General anxiety            | 1789 | -31.00 | 37.00 | 1.04  | 6.75 | 0.15 | 537 | -24.00 | 29.00 | 0.36  | 5.57 | 0.06 | 1252 | -31.00 | 37.00 | 1.33  | 7.18 | 0.18 | 9.48  | .002  | .00 |
| Depression                 | 1857 | -15.00 | 15.00 | -0.19 | 3.87 | 0.05 | 571 | -13.00 | 14.00 | -0.54 | 3.57 | 0.15 | 1286 | -15.00 | 15.00 | -0.04 | 3.98 | 0.01 | 7.19  | .007  | .00 |
| Self-harm                  | 1771 | -4.00  | 2.00  | -0.15 | 0.62 | 0.24 | 529 | -4.00  | 1.00  | -0.11 | 0.52 | 0.20 | 1242 | -4.00  | 2.00  | -0.17 | 0.66 | 0.26 | 4.63  | .032  | .00 |
| Physical activity          | 1852 | -3.83  | 3.50  | -0.15 | 1.11 | 0.14 | 566 | -3.83  | 3.50  | -0.36 | 1.13 | 0.31 | 1286 | -3.67  | 3.33  | -0.06 | 1.09 | 0.06 | 26.55 | <.001 | .01 |
| Media use                  | 1845 | -10.00 | 8.00  | -0.62 | 2.25 | 0.27 | 563 | -10.00 | 8.00  | -0.80 | 2.32 | 0.35 | 1282 | -10.00 | 8.00  | -0.54 | 2.22 | 0.24 | 5.29  | .022  | .00 |
| Volunteering               | 1854 | -8.00  | 7.00  | -1.86 | 2.15 | 0.86 | 571 | -8.00  | 6.00  | -1.83 | 2.12 | 0.86 | 1283 | -8.00  | 7.00  | -1.87 | 2.17 | 0.86 | 0.10  | .753  | .00 |

<sup>a</sup> *F* and *p* values are reported with Welch's correction (Welch, 1951) as the assumption of homogeneity of variance was violated for several variables.



**Supplementary Table 10.** Phenotypic correlations between T1 and T2 for the whole sample and split by males and females.

| Construct                      | All      |          |          | Males    |          |          | Females  |          |          |
|--------------------------------|----------|----------|----------|----------|----------|----------|----------|----------|----------|
|                                | <i>r</i> | <i>p</i> | <i>n</i> | <i>r</i> | <i>p</i> | <i>n</i> | <i>r</i> | <i>p</i> | <i>n</i> |
| Love and relationships         | .43      | <.001    | 1832     | .42      | <.001    | 539      | .43      | <.001    | 1293     |
| Achievement motivation         | .61      | <.001    | 1872     | .66      | <.001    | 551      | .58      | <.001    | 1321     |
| Importance of Relationships    | .61      | <.001    | 1872     | .58      | <.001    | 551      | .63      | <.001    | 1321     |
| Purpose in Life                | .68      | <.001    | 1871     | .69      | <.001    | 551      | .67      | <.001    | 1320     |
| Healthcare                     | .31      | <.001    | 1869     | .39      | <.001    | 550      | .27      | <.001    | 1319     |
| Community satisfaction         | .43      | <.001    | 1865     | .44      | <.001    | 551      | .42      | <.001    | 1314     |
| Attitudes towards money        | .39      | <.001    | 1831     | .41      | <.001    | 546      | .38      | <.001    | 1285     |
| Alcohol (frequency x quantity) | .44      | <.001    | 1700     | .49      | <.001    | 490      | .42      | <.001    | 1210     |
| Conduct problems               | .32      | <.001    | 1838     | .30      | <.001    | 545      | .33      | <.001    | 1293     |
| Emotional problems             | .56      | <.001    | 1838     | .59      | <.001    | 545      | .55      | <.001    | 1293     |
| Hyperactivity                  | .45      | <.001    | 1838     | .49      | <.001    | 545      | .43      | <.001    | 1293     |
| Peer problems                  | .58      | <.001    | 1838     | .54      | <.001    | 545      | .59      | <.001    | 1293     |
| Prosocial behaviour            | .46      | <.001    | 1838     | .49      | <.001    | 545      | .45      | <.001    | 1293     |
| General anxiety                | .57      | <.001    | 1774     | .57      | <.001    | 513      | .58      | <.001    | 1261     |
| Depression                     | .56      | <.001    | 1837     | .55      | <.001    | 545      | .56      | <.001    | 1292     |
| Physical activity              | .47      | <.001    | 1846     | .51      | <.001    | 545      | .45      | <.001    | 1301     |
| Media use                      | .47      | <.001    | 1841     | .57      | <.001    | 545      | .43      | <.001    | 1296     |
| Volunteering                   | .29      | <.001    | 1837     | .29      | <.001    | 545      | .29      | <.001    | 1292     |

*Note: Scores were corrected for mean age and sex differences (see Methods).*

**Supplementary Table 11.** Measures, test-retest reliabilities and references.

| Theme                         | Variable Name               | Scale/item <sup>a</sup>                                                                 | No. of items | Test-retest <sup>b</sup> | Reference <sup>c</sup>                                                                                                                                                                                                                   |
|-------------------------------|-----------------------------|-----------------------------------------------------------------------------------------|--------------|--------------------------|------------------------------------------------------------------------------------------------------------------------------------------------------------------------------------------------------------------------------------------|
| <b>Crisis questionnaire</b>   | Multiple items              | Items about home environment, life changes, and physical health                         | 41           | -                        | Adapted from the The CoRoNaVirus Health Impact Survey (CRISIS; <a href="https://github.com/nimh-mbdu/CRISIS">https://github.com/nimh-mbdu/CRISIS</a> )                                                                                   |
| <b>Relationships</b>          | Love and relationships      | CLAS - Love and Relationships                                                           | 3            | 0.71                     | Lavallee, Hatch, Michalos, and McKinley (2007)                                                                                                                                                                                           |
|                               | Verbal peer victimisation   | Peer victimisation                                                                      | 4            | Kept original scale      | Mynard, H., and Joseph (2000)                                                                                                                                                                                                            |
|                               | Cyber peer victimisation    | Peer victimisation                                                                      | 4            | Kept original scale      | Mynard, H., and Joseph (2000)                                                                                                                                                                                                            |
|                               | Physical peer victimisation | Peer victimisation                                                                      | 4            | Kept original scale      | Mynard, H., and Joseph (2000)                                                                                                                                                                                                            |
| <b>Thoughts and attitudes</b> | Importance of Relationships | GOALS - self-fulfillment                                                                | 5            | 0.73                     | Pöhlmann and Brunstein (1997)                                                                                                                                                                                                            |
|                               | Achievement Motivation      | GOALS - relationships                                                                   | 4            | 0.69                     | Pöhlmann and Brunstein (1997)                                                                                                                                                                                                            |
|                               | Purpose in Life             | Purpose in Life                                                                         | 5            | 0.82                     | Crumbaugh and Maholick (1964)                                                                                                                                                                                                            |
|                               | Healthcare                  | BSA Democracy and Government (single item about attitudes towards universal healthcare) | 1            | 0.47                     | Taken from the NatCen Social Research's British Social Attitudes (BSA) Survey ( <a href="http://natcen.ac.uk/our-research/research/british-social-attitudes/">http://natcen.ac.uk/our-research/research/british-social-attitudes/</a> ). |
|                               | Community satisfaction      | CLAS Life Satisfaction Scale - Community.                                               | 5            | 0.5                      | Lavallee, Hatch, Michalos, and McKinley (2007)                                                                                                                                                                                           |

|                      |                                         |                                                               |   |                     |                                                                                                                                                                                                                             |
|----------------------|-----------------------------------------|---------------------------------------------------------------|---|---------------------|-----------------------------------------------------------------------------------------------------------------------------------------------------------------------------------------------------------------------------|
|                      | Attitudes towards money                 | OECD Financial Literacy: General Money Attitude and Behaviour | 1 | 0.73                | Adapted from sections of the OECD instrument for measuring financial literacy:<br><a href="https://www.oecd.org/finance/financial-education/49319977.pdf">https://www.oecd.org/finance/financial-education/49319977.pdf</a> |
| <b>Substance use</b> | Alcohol frequency                       | Alcohol use                                                   | 1 | 0.71                | Adapted from items 1-10 of the AUDIT scale:<br><a href="https://www.drugabuse.gov/sites/default/files/files/AUDIT.pdf">https://www.drugabuse.gov/sites/default/files/files/AUDIT.pdf</a>                                    |
|                      | Alcohol quantity                        | Alcohol use                                                   | 1 | 0.71                | Adapted from items 1-10 of the AUDIT scale:<br><a href="https://www.drugabuse.gov/sites/default/files/files/AUDIT.pdf">https://www.drugabuse.gov/sites/default/files/files/AUDIT.pdf</a>                                    |
|                      | Alcohol (frequency x quantity)          | Alcohol use                                                   | 1 | 0.71                | Adapted from items 1-10 of the AUDIT scale:<br><a href="https://www.drugabuse.gov/sites/default/files/files/AUDIT.pdf">https://www.drugabuse.gov/sites/default/files/files/AUDIT.pdf</a>                                    |
|                      | Ever smoked <sup>d</sup>                | Smoking (inc. vaping)                                         | 1 | 0.67                | Adapted from Heatherton, Kozlowski, Frecker, and Fagerstrom (1991)                                                                                                                                                          |
|                      | Smoking frequency <sup>d</sup>          | Smoking (inc. vaping)                                         | 1 | 0.67                | Adapted from Heatherton, Kozlowski, Frecker, and Fagerstrom (1991)                                                                                                                                                          |
|                      | Ever vaped <sup>d</sup>                 | Smoking (inc. vaping)                                         | 1 | 0.67                | Adapted from Heatherton, Kozlowski, Frecker, and Fagerstrom (1991)                                                                                                                                                          |
|                      | Vaping frequency <sup>d</sup>           | Smoking (inc. vaping)                                         | 1 | 0.67                | Adapted from Heatherton, Kozlowski, Frecker, and Fagerstrom (1991)                                                                                                                                                          |
|                      | Ever used cannabis <sup>d</sup>         | Cannabis use                                                  | 1 | Kept original scale | Legleye, Piontek, and Kraus, (2011)                                                                                                                                                                                         |
|                      | Cannabis smoking frequency <sup>d</sup> | Cannabis use                                                  | 1 | Kept original scale | Legleye, Piontek, and Kraus, (2011)                                                                                                                                                                                         |
| <b>Wellbeing</b>     | Conduct problems                        | SDQ - Conduct problems                                        | 5 | 0.7                 | Goodman (1997)                                                                                                                                                                                                              |
|                      | Emotional problems                      | SDQ - Emotional problems                                      | 5 | 0.8                 | Goodman (1997)                                                                                                                                                                                                              |
|                      | Hyperactivity                           | SDQ - Hyperactivity                                           | 5 | 0.71                | Goodman (1997)                                                                                                                                                                                                              |

|                   |                     |                                                                        |    |                                                             |                                                                                                                                                                                                                                                                                                      |
|-------------------|---------------------|------------------------------------------------------------------------|----|-------------------------------------------------------------|------------------------------------------------------------------------------------------------------------------------------------------------------------------------------------------------------------------------------------------------------------------------------------------------------|
|                   | Peer problems       | SDQ - Peer problems                                                    | 5  | 0.8                                                         | Goodman (1997)                                                                                                                                                                                                                                                                                       |
|                   | Prosocial behaviour | SDQ - Prosocial behaviour                                              | 5  | -                                                           | Goodman (1997)                                                                                                                                                                                                                                                                                       |
|                   | General anxiety     | General Anxiety: the Severity Measure for Generalized Anxiety Disorder | 10 | Kept the original scale                                     | Craske et al. (2013)                                                                                                                                                                                                                                                                                 |
|                   | Depression          | Short Mood and Feeling Questionnaire (SMFQ)                            | 8  | Kept the original scale                                     | Angold et al. (1995)                                                                                                                                                                                                                                                                                 |
|                   | Self-harm           | CASE - Self-harm                                                       | 1  | 0.56                                                        | Adapted from Madge et al. (2008)                                                                                                                                                                                                                                                                     |
|                   | Physical activity   | Activity questionnaire                                                 | 3  | Kept the original scale                                     | Questions devised by TEDS researchers.                                                                                                                                                                                                                                                               |
| <b>Behaviours</b> | Media use           | Media and Technology Usage and Attitudes Scale                         | 4  | .73 (video games sub-scale)<br>.82 (social media sub-scale) | Rosen, Whaling, Carrier, Cheever, & Rokkum (2013)                                                                                                                                                                                                                                                    |
|                   | Volunteering        | Volunteering                                                           | 3  | .84                                                         | Adapted from page 42 of the ALSPAC questionnaire "It's all about you" at age 20: <a href="http://www.bristol.ac.uk/media-library/sites/alspac/migrated/documents/ques-yp20-all-about-you.pdf">http://www.bristol.ac.uk/media-library/sites/alspac/migrated/documents/ques-yp20-all-about-you.pdf</a> |

<sup>a</sup> More information about the variables and the references can be found in the TEDS data dictionary

([http://www.teds.ac.uk/datadictionary/studies/measures/21yr\\_measures.htm](http://www.teds.ac.uk/datadictionary/studies/measures/21yr_measures.htm)).

<sup>b</sup> Test-retest reliability figures are from T1 questionnaire construction.

<sup>c</sup> Note that measures were shortened and adapted from the referenced measures.

<sup>d</sup> Smoking and vaping measures were not included in the present analyses because too few twins endorsed them.

**Supplementary Table 12.** Twin intraclass correlations and Falconer ACE estimates.

| Construct                      | T1       |          |          |          |          |          |                        |     |     |
|--------------------------------|----------|----------|----------|----------|----------|----------|------------------------|-----|-----|
|                                | MZ       |          |          | DZ       |          |          | Falconer ACE estimates |     |     |
|                                | <i>r</i> | <i>p</i> | <i>n</i> | <i>r</i> | <i>p</i> | <i>n</i> | A                      | C   | E   |
| Love and relationships         | .19      | <.001    | 929      | .08      | .005     | 1351     | .19                    | .00 | .81 |
| Achievement motivation         | .37      | <.001    | 923      | .16      | <.001    | 1361     | .37                    | .00 | .63 |
| Importance of Relationships    | .42      | <.001    | 923      | .10      | <.001    | 1361     | .42                    | .00 | .58 |
| Purpose in Life                | .38      | <.001    | 922      | .21      | <.001    | 1361     | .34                    | .05 | .62 |
| Healthcare                     | .36      | <.001    | 922      | .16      | <.001    | 1354     | .36                    | .00 | .65 |
| Community satisfaction         | .42      | <.001    | 926      | .35      | <.001    | 1339     | .14                    | .28 | .58 |
| Attitudes towards money        | .26      | <.001    | 894      | .05      | .059     | 1274     | .26                    | .00 | .74 |
| Alcohol (frequency x quantity) | .36      | <.001    | 793      | .15      | <.001    | 1139     | .36                    | .00 | .64 |
| Conduct problems               | .28      | <.001    | 901      | .12      | <.001    | 1331     | .28                    | .00 | .72 |
| Emotional problems             | .36      | <.001    | 901      | .18      | <.001    | 1331     | .34                    | .01 | .65 |
| Hyperactivity                  | .39      | <.001    | 901      | .16      | <.001    | 1331     | .39                    | .00 | .61 |
| Peer problems                  | .39      | <.001    | 901      | .24      | <.001    | 1331     | .30                    | .09 | .61 |
| Prosocial behaviour            | .28      | <.001    | 901      | .11      | <.001    | 1331     | .28                    | .00 | .72 |
| General anxiety                | .38      | <.001    | 847      | .14      | <.001    | 1214     | .38                    | .00 | .63 |
| Depression                     | .35      | <.001    | 901      | .18      | <.001    | 1331     | .33                    | .02 | .65 |
| Physical activity              | .41      | <.001    | 918      | .18      | <.001    | 1325     | .41                    | .00 | .59 |
| Media use                      | .41      | <.001    | 918      | .18      | <.001    | 1325     | .41                    | .00 | .59 |
| Volunteering                   | .35      | <.001    | 900      | .13      | <.001    | 1331     | .35                    | .00 | .65 |

Note: MZ=monozygotic; DZ=dizygotic; and genetic (A), shared environmental (C) and non-shared environmental (E) estimates. Scores were corrected for mean age and sex differences (see Methods). ACE estimates were derived from the intraclass twin correlations using Falconer's formula (Rijsdijk & Sham, 2002).

**Supplementary Table 13.** Twin intraclass correlations and Falconer ACE estimates.

| Construct                      | T2       |          |          |          |          |          |                        |     |     |
|--------------------------------|----------|----------|----------|----------|----------|----------|------------------------|-----|-----|
|                                | MZ       |          |          | DZ       |          |          | Falconer ACE estimates |     |     |
|                                | <i>r</i> | <i>p</i> | <i>n</i> | <i>r</i> | <i>p</i> | <i>n</i> | A                      | C   | E   |
| Love and relationships         | .25      | <.001    | 530      | .07      | .077     | 600      | .25                    | .00 | .75 |
| Achievement motivation         | .39      | <.001    | 548      | .17      | <.001    | 625      | .39                    | .00 | .61 |
| Importance of Relationships    | .39      | <.001    | 548      | .14      | .001     | 625      | .39                    | .00 | .61 |
| Purpose in Life                | .43      | <.001    | 552      | .27      | <.001    | 625      | .32                    | .11 | .57 |
| Healthcare                     | .20      | <.001    | 552      | .13      | .001     | 625      | .14                    | .06 | .80 |
| Community satisfaction         | .29      | <.001    | 552      | .11      | .005     | 625      | .29                    | .00 | .71 |
| Attitudes towards money        | .19      | <.001    | 552      | .04      | .304     | 625      | .19                    | .00 | .81 |
| Alcohol (frequency x quantity) | .39      | <.001    | 550      | .23      | <.001    | 620      | .32                    | .07 | .61 |
| Conduct problems               | .17      | <.001    | 550      | .18      | <.001    | 620      | .00                    | .17 | .83 |
| Emotional problems             | .39      | <.001    | 550      | .20      | <.001    | 620      | .38                    | .01 | .61 |
| Hyperactivity                  | .36      | <.001    | 550      | .09      | .027     | 620      | .36                    | .00 | .64 |
| Peer problems                  | .42      | <.001    | 550      | .23      | <.001    | 620      | .38                    | .04 | .58 |
| Prosocial behaviour            | .35      | <.001    | 550      | .19      | <.001    | 620      | .32                    | .03 | .65 |
| General anxiety                | .42      | <.001    | 550      | .19      | <.001    | 620      | .42                    | .00 | .58 |
| Depression                     | .38      | <.001    | 550      | .18      | <.001    | 620      | .38                    | .00 | .62 |
| Physical activity              | .40      | <.001    | 549      | .27      | <.001    | 620      | .26                    | .14 | .60 |
| Media use                      | .49      | <.001    | 549      | .14      | .001     | 620      | .49                    | .00 | .51 |
| Volunteering                   | .38      | <.001    | 549      | .09      | .023     | 620      | .38                    | .00 | .62 |

Note: MZ=monozygotic; DZ=dizygotic; and genetic (A), shared environmental (C) and non-shared environmental (E) estimates. Scores were corrected for mean age and sex differences (see Methods). ACE estimates were derived from the intraclass twin correlations using Falconer's formula (Rijsdijk & Sham, 2002).

**Supplementary Table 14.** Twin intraclass correlations and Falconer ACE estimates.

| Construct                      | T2 change |          |          |          |          |          |                        |     |     |
|--------------------------------|-----------|----------|----------|----------|----------|----------|------------------------|-----|-----|
|                                | MZ        |          |          | DZ       |          |          | Falconer ACE estimates |     |     |
|                                | <i>r</i>  | <i>p</i> | <i>n</i> | <i>r</i> | <i>p</i> | <i>n</i> | A                      | C   | E   |
| Love and relationships         | .17       | <.001    | 482      | .05      | .305     | 530      | .17                    | .00 | .83 |
| Achievement motivation         | .16       | <.001    | 492      | .06      | .168     | 544      | .16                    | .00 | .84 |
| Importance of Relationships    | .12       | .010     | 492      | .00      | .997     | 544      | .12                    | .00 | .88 |
| Purpose in Life                | .13       | .003     | 495      | .12      | .007     | 544      | .02                    | .11 | .87 |
| Healthcare                     | .11       | .018     | 495      | .07      | .099     | 543      | .08                    | .03 | .89 |
| Community satisfaction         | .20       | <.001    | 499      | -.03     | .482     | 547      | .20                    | .00 | .80 |
| Attitudes towards money        | .12       | .008     | 488      | -.01     | .914     | 521      | .12                    | .00 | .88 |
| Alcohol (frequency x quantity) | .22       | <.001    | 446      | .03      | .505     | 476      | .22                    | .00 | .78 |
| Conduct problems               | .14       | .003     | 484      | .12      | .005     | 538      | .04                    | .10 | .86 |
| Emotional problems             | .25       | <.001    | 484      | .06      | .194     | 538      | .25                    | .00 | .75 |
| Hyperactivity                  | .20       | <.001    | 484      | .09      | .036     | 538      | .20                    | .00 | .80 |
| Peer problems                  | .19       | <.001    | 484      | .08      | .066     | 538      | .19                    | .00 | .81 |
| Prosocial behaviour            | .15       | .001     | 484      | .13      | .003     | 538      | .04                    | .11 | .85 |
| General anxiety                | .25       | <.001    | 475      | .10      | .021     | 513      | .25                    | .00 | .75 |
| Depression                     | .13       | .003     | 484      | .08      | .062     | 538      | .10                    | .03 | .87 |
| Physical activity              | .25       | <.001    | 493      | .17      | <.001    | 538      | .16                    | .09 | .75 |
| Media use                      | .32       | <.001    | 493      | .05      | .244     | 534      | .32                    | .00 | .68 |
| Volunteering                   | .31       | <.001    | 483      | .07      | .106     | 538      | .31                    | .00 | .69 |

Note: MZ=monozygotic; DZ=dizygotic; and genetic (A), shared environmental (C) and non-shared environmental (E) estimates. Scores were corrected for mean age and sex differences (see Methods). ACE estimates were derived from the intraclass twin correlations using Falconer's formula (Rijsdijk & Sham, 2002).

**Supplementary Table 15.** Whole sample model fitting results for univariate analyses of additive genetic (A), shared environmental (C), and non-shared environmental (E) components of variance for variables (95% confidence intervals in parentheses).

| Construct                      | T1            |               |               | T2            |               |               | T2 change     |               |               |
|--------------------------------|---------------|---------------|---------------|---------------|---------------|---------------|---------------|---------------|---------------|
|                                | A             | C             | E             | A             | C             | E             | A             | C             | E             |
| Love and relationships         | .18 (.07-.24) | .00 (.00-.00) | .82 (.76-.87) | .23 (.09-.30) | .00 (.00-.00) | .77 (.70-.85) | .15 (.00-.23) | .00 (.00-.13) | .85 (.77-.92) |
| Achievement motivation         | .36 (.26-.41) | .00 (.00-.00) | .64 (.59-.69) | .38 (.21-.44) | .00 (.00-.13) | .62 (.56-.68) | .15 (.07-.23) | .00 (.00-.14) | .85 (.77-.93) |
| Importance of Relationships    | .38 (.32-.43) | .00 (.00-.02) | .62 (.57-.67) | .35 (.21-.41) | .00 (.00-.11) | .65 (.59-.71) | .09 (.05-.17) | .00 (.00-.10) | .91 (.83-.95) |
| Purpose in Life                | .37 (.22-.45) | .03 (.00-.14) | .61 (.55-.66) | .41 (.22-.52) | .05 (.00-.20) | .54 (.48-.61) | .05 (.00-.23) | .09 (.00-.18) | .86 (.77-.93) |
| Healthcare                     | .36 (.26-.41) | .00 (.00-.07) | .64 (.59-.69) | .14 (.00-.30) | .08 (.00-.23) | .78 (.70-.87) | .08 (.00-.20) | .03 (.00-.15) | .89 (.80-.97) |
| Community satisfaction         | .13 (.00-.26) | .29 (.18-.39) | .58 (.53-.63) | .29 (.15-.35) | .00 (.00-.10) | .71 (.64-.78) | .14 (.05-.22) | .00 (.00-.06) | .86 (.78-.94) |
| Attitudes towards money        | .22 (.15-.28) | .00 (.00-.04) | .78 (.72-.83) | .16 (.03-.23) | .00 (.00-.00) | .84 (.77-.91) | .09 (.00-.17) | .00 (.00-.09) | .91 (.83-.99) |
| Alcohol (frequency x quantity) | .35 (.25-.41) | .00 (.00-.00) | .65 (.59-.70) | .40 (.20-.49) | .03 (.00-.18) | .58 (.51-.65) | .19 (.06-.28) | .00 (.00-.09) | .81 (.72-.89) |
| Conduct problems               | .27 (.17-.33) | .00 (.00-.08) | .73 (.67-.78) | .01 (.00-.24) | .19 (.01-.25) | .81 (.72-.87) | .04 (.00-.23) | .10 (.00-.19) | .86 (.77-.93) |



|                     |               |               |               |               |               |               |               |               |               |
|---------------------|---------------|---------------|---------------|---------------|---------------|---------------|---------------|---------------|---------------|
| Emotional problems  | .33 (.18-.40) | .02 (.00-.13) | .65 (.60-.71) | .39 (.20-.45) | .00 (.00-.15) | .61 (.55-.68) | .22 (.10-.30) | .00 (.00-.09) | .78 (.70-.86) |
| Hyperactivity       | .38 (.29-.42) | .00 (.00-.07) | .62 (.58-.67) | .34 (.25-.40) | .00 (.00-.00) | .66 (.60-.73) | .20 (.00-.28) | .00 (.00-.15) | .80 (.72-.87) |
| Peer problems       | .29 (.15-.43) | .09 (.00-.20) | .61 (.56-.67) | .36 (.16-.48) | .06 (.00-.22) | .58 (.52-.65) | .18 (.00-.26) | .00 (.00-.18) | .82 (.74-.90) |
| Prosocial behaviour | .27 (.15-.32) | .00 (.00-.09) | .73 (.68-.79) | .34 (.14-.42) | .01 (.00-.17) | .64 (.58-.72) | .03 (.00-.23) | .12 (.00-.20) | .85 (.77-.91) |
| General anxiety     | .36 (.28-.41) | .00 (.00-.06) | .64 (.59-.69) | .39 (.20-.45) | .00 (.00-.15) | .61 (.55-.68) | .26 (.11-.33) | .00 (.00-.11) | .74 (.67-.82) |
| Depression          | .29 (.13-.39) | .05 (.00-.16) | .67 (.61-.72) | .39 (.24-.45) | .00 (.00-.12) | .61 (.55-.68) | .12 (.00-.22) | .02 (.00-.16) | .86 (.78-.92) |
| Physical activity   | .40 (.29-.44) | .00 (.00-.08) | .60 (.56-.65) | .30 (.10-.46) | .12 (.00-.27) | .58 (.52-.66) | .17 (.00-.34) | .09 (.00-.26) | .74 (.66-.83) |
| Media use           | .45 (.35-.50) | .00 (.00-.08) | .55 (.50-.60) | .44 (.35-.49) | .00 (.00-.00) | .56 (.51-.62) | .26 (.16-.33) | .00 (.00-.08) | .74 (.67-.81) |
| Volunteering        | .32 (.23-.37) | .00 (.00-.00) | .68 (.63-.73) | .35 (.26-.41) | .00 (.00-.00) | .65 (.59-.72) | .28 (.19-.36) | .00 (.00-.06) | .72 (.64-.79) |

*Note: Scores were corrected for mean age and sex differences (see Methods).*

**Supplementary Table 16.** Bivariate Cholesky decomposition estimating the aetiology of the association between T1 (A1, C1 and E1) and T2 (A2, C2 and E2), for variable in the relationships theme (95% confidence intervals in parentheses).

| Trait                  | A1                  | A2                  |
|------------------------|---------------------|---------------------|
| Love and relationships | 0.183 (0.070,0.236) |                     |
| Love and relationships | 0.173(0.089,0.305)  | 0.077 (0.000,0.147) |
|                        | C1                  | C2                  |
| Love and relationships | 0.000 (0.000,0.082) |                     |
| Love and relationships | 0.000 (0.000,0.072) | 0.000 (0.000,0.071) |
|                        | E1                  | E2                  |
| Love and relationships | 0.815 (0.749,0.882) |                     |
| Love and relationships | 0.083 (0.056,0.114) | 0.666 (0.595,0.740) |

*Note: Scores were corrected for mean age and sex differences (see Methods).*

**Supplementary Table 17.** Bivariate Cholesky decomposition estimating the aetiology of the association between T1 (A1, C1 and E1) and T2 (A2, C2 and E2), for variables in the thoughts and attitudes theme (95% confidence intervals in parentheses).

| <i>(a)</i>                  |                     |                     |
|-----------------------------|---------------------|---------------------|
| Trait                       | A1                  | A2                  |
| Achievement motivation      | 0.348 (0.245,0.393) |                     |
| Achievement motivation      | 0.328 (0.192,0.407) | 0.043 (0.000,0.101) |
|                             | C1                  | C2                  |
| Achievement motivation      | 0.000 (0.000,0.076) |                     |
| Achievement motivation      | 0.000 (0.000,0.137) | 0.000 (0.000,0.066) |
|                             | E1                  | E2                  |
| Achievement motivation      | 0.630 (0.573,0.690) |                     |
| Achievement motivation      | 0.092 (0.066,0.122) | 0.531 (0.471,0.594) |
| <i>(b)</i>                  |                     |                     |
| Trait                       | A1                  | A2                  |
| Importance of relationships | 0.376 (0.324,0.422) |                     |
| Importance of relationships | 0.361 (0.285,0.412) | 0.000 (0.000,0.041) |
|                             | C1                  | C2                  |
| Importance of relationships | 0.000 (0.000,0.027) |                     |
| Importance of relationships | 0.000 (0.000,0.060) | 0.000 (0.000,0.029) |
|                             | E1                  | E2                  |
| Importance of relationships | 0.626 (0.567,0.688) |                     |
| Importance of relationships | 0.100 (0.075,0.129) | 0.537 (0.488,0.587) |
| <i>(c)</i>                  |                     |                     |
| Trait                       | A1                  | A2                  |
| Purpose in life             | 0.385 (0.250,0.450) |                     |

|                        |                     |                     |
|------------------------|---------------------|---------------------|
| Purpose in life        | 0.432 (0.265,0.516) | 0.000 (0.000,0.091) |
|                        | C1                  | C2                  |
| Purpose in life        | 0.020 (0.000,0.124) |                     |
| Purpose in life        | 0.001 (0.000,0.154) | 0.028 (0.000,0.076) |
|                        | E1                  | E2                  |
| Purpose in life        | 0.602 (0.543,0.665) |                     |
| Purpose in life        | 0.104 (0.077,0.138) | 0.436 (0.386,0.490) |
| <i>(d)</i>             |                     |                     |
| Trait                  | A1                  | A2                  |
| Healthcare             | 0.376 (0.274,0.426) |                     |
| Healthcare             | 0.146 (0.057,0.245) | 0.049 (0.000,0.150) |
|                        | C1                  | C2                  |
| Healthcare             | 0.000 (0.000,0.073) |                     |
| Healthcare             | 0.009 (0.000,0.144) | 0.010 (0.000,0.114) |
|                        | E1                  | E2                  |
| Healthcare             | 0.678 (0.614,0.745) |                     |
| Healthcare             | 0.019 (0.006,0.039) | 0.830 (0.741,0.918) |
| <i>(e)</i>             |                     |                     |
| Trait                  | A1                  | A2                  |
| Community satisfaction | 0.128 (0.007,0.255) |                     |
| Community satisfaction | 0.098 (0.000,0.279) | 0.087 (0.000,0.160) |
|                        | C1                  | C2                  |
| Community satisfaction | 0.284 (0.184,0.378) |                     |
| Community satisfaction | 0.074 (0.018,0.159) | 0.000 (0.000,0.051) |
|                        | E1                  | E2                  |
| Community satisfaction | 0.566 (0.509,0.628) |                     |
| Community satisfaction | 0.049 (0.027,0.078) | 0.687 (0.613,0.764) |
| <i>(f)</i>             |                     |                     |
| Trait                  | A1                  | A2                  |
| Money attitudes        | 0.220 (0.150,0.273) |                     |
| Money attitudes        | 0.117 (0.046,0.200) | 0.063 (0.000,0.132) |
|                        | C1                  | C2                  |
| Money attitudes        | 0.000 (0.000,0.044) |                     |
| Money attitudes        | 0.000 (0.000,0.098) | 0.000 (0.000,0.076) |
|                        | E1                  | E2                  |
| Money attitudes        | 0.782 (0.716,0.849) |                     |
| Money attitudes        | 0.064 (0.040,0.094) | 0.754 (0.678,0.833) |

*Note: Scores were corrected for mean age and sex differences (see Methods).*

**Supplementary Table 18.** Bivariate Cholesky decomposition estimating the aetiology of the association between T1 (A1, C1 and E1) and T2 (A2, C2 and E2), for variables in the substance use theme (95% confidence intervals in parentheses).

| Trait                | A1                  | A2                  |
|----------------------|---------------------|---------------------|
| Alcohol freq x quant | 0.379 (0.261,0.431) |                     |
| Alcohol freq x quant | 0.257 (0.127,0.337) | 0.157 (0.049,0.223) |
|                      | C1                  | C2                  |
| Alcohol freq x quant | 0.000 (0.000,0.088) |                     |
| Alcohol freq x quant | 0.000 (0.000,0.139) | 0.000 (0.000,0.074) |
|                      | E1                  | E2                  |
| Alcohol freq x quant | 0.667 (0.602,0.736) |                     |
| Alcohol freq x quant | 0.042 (0.024,0.066) | 0.565 (0.499,0.637) |

*Note: Scores were corrected for mean age and sex differences (see Methods).*

**Supplementary Table 19.** Bivariate Cholesky decomposition estimating the aetiology of the association between T1 (A1, C1 and E1) and T2 (A2, C2 and E2), for variables in the wellbeing theme (95% confidence intervals in parentheses).

| <i>(a)</i>         |                     |                     |
|--------------------|---------------------|---------------------|
| Trait              | A1                  | A2                  |
| Conduct problems   | 0.308 (0.192,0.363) |                     |
| Conduct problems   | 0.109 (0.016,0.234) | 0.000 (0.000,0.157) |
|                    | C1                  | C2                  |
| Conduct problems   | 0.000(0.000,0.083)  |                     |
| Conduct problems   | 0.082 (0.000,0.195) | 0.016 (0.000,0.150) |
|                    | E1                  | E2                  |
| Conduct problems   | 0.783(0.713,0.855)  |                     |
| Conduct problems   | 0.038 (0.018,0.067) | 0.798(0.718,0.873)  |
| <i>(b)</i>         |                     |                     |
| Trait              | A1                  | A2                  |
| Emotional problems | 0.300 (0.160,0.390) |                     |
| Emotional problems | 0.253 (0.122,0.403) | 0.101 (0.000,0.161) |
|                    | C1                  | C2                  |
| Emotional problems | 0.041 (0.000,0.147) |                     |
| Emotional problems | 0.032 (0.000,0.148) | 0.000 (0.000,0.065) |
|                    | E1                  | E2                  |
| Emotional problems | 0.656 (0.594,0.721) |                     |
| Emotional problems | 0.078 (0.053,0.110) | 0.537 (0.476,0.604) |
| <i>(c)</i>         |                     |                     |
| Trait              | A1                  | A2                  |
| Hyperactivity      | 0.355 (0.250,0.425) |                     |
| Hyperactivity      | 0.275 (0.165,0.384) | 0.050 (0.000,0.185) |

|                     |                     |                     |
|---------------------|---------------------|---------------------|
|                     | C1                  | C2                  |
| Hyperactivity       | 0.024 (0.000,0.100) |                     |
| Hyperactivity       | 0.016 (0.000,0.091) | 0.000 (0.000,0.080) |
|                     | E1                  | E2                  |
| Hyperactivity       | 0.632 (0.571,0.697) |                     |
| Hyperactivity       | 0.037 (0.020,0.062) | 0.626 (0.554,0.702) |
| <i>(d)</i>          |                     |                     |
| Trait               | A1                  | A2                  |
| Peer problems       | 0.298 (0.161,0.420) |                     |
| Peer problems       | 0.272 (0.133,0.449) | 0.066 (0.000,0.123) |
|                     | C1                  | C2                  |
| Peer problems       | 0.088 (0.000,0.194) |                     |
| Peer problems       | 0.072 (0.000,0.204) | 0.000 (0.000,0.085) |
|                     | E1                  | E2                  |
| Peer problems       | 0.603 (0.544,0.666) |                     |
| Peer problems       | 0.069 (0.045,0.099) | 0.512 (0.453,0.576) |
| <i>(e)</i>          |                     |                     |
| Trait               | A1                  | A2                  |
| Prosocial behaviour | 0.272 (0.176,0.323) |                     |
| Prosocial behaviour | 0.327 (0.184,0.419) | 0.00 (-0.130,0.125) |
|                     | C1                  | C2                  |
| Prosocial behaviour | 0.001 (0.000,0.072) |                     |
| Prosocial behaviour | 0.036 (0.000,0.151) | 0.000 (0.000,0.105) |
|                     | E1                  | E2                  |
| Prosocial behaviour | 0.747 (0.684,0.812) |                     |
| Prosocial behaviour | 0.042 (0.025,0.065) | 0.597 (0.532,0.665) |
| <i>(f)</i>          |                     |                     |
| Trait               | A1                  | A2                  |
| General anxiety     | 0.358 (0.271,0.407) |                     |
| General anxiety     | 0.332 (0.235,0.434) | 0.108 (0.000,0.169) |
|                     | C1                  | C2                  |
| General anxiety     | 0.000 (0.000,0.061) |                     |
| General anxiety     | 0.000 (0.000,0.091) | 0.000 (0.000,0.070) |
|                     | E1                  | E2                  |
| General anxiety     | 0.651 (0.589,0.716) |                     |
| General anxiety     | 0.084 (0.059,0.114) | 0.476 (0.418,0.540) |
| <i>(g)</i>          |                     |                     |
| Trait               | A1                  | A2                  |
| Depression          | 0.323 (0.202,0.393) |                     |
| Depression          | 0.390 (0.251,0.451) | 0.000 (0.000,0.071) |
|                     | C1                  | C2                  |
| Depression          | 0.023 (0.000,0.121) |                     |
| Depression          | 0.004 (0.000,0.106) | 0.000 (0.000,0.048) |

|                   | E1                  | E2                  |
|-------------------|---------------------|---------------------|
| Depression        | 0.654 (0.596,0.714) |                     |
| Depression        | 0.048 (0.030,0.072) | 0.560 (0.499,0.623) |
| <i>(h)</i>        |                     |                     |
| Trait             | A1                  | A2                  |
| Physical activity | 0.344 (0.239,0.420) |                     |
| Physical activity | 0.107 (0.024,0.221) | 0.084 (0.000,0.201) |
|                   | C1                  | C2                  |
| Physical activity | 0.048 (0.002,0.125) |                     |
| Physical activity | 0.198 (0.038,0.332) | 0.000 (0.000,0.130) |
|                   | E1                  | E2                  |
| Physical activity | 0.623 (0.564,0.687) |                     |
| Physical activity | 0.056 (0.033,0.084) | 0.559 (0.491,0.635) |

*Note: Scores were corrected for mean age and sex differences (see Methods).*

**Supplementary Table 20.** Bivariate Cholesky decomposition estimating the aetiology of the association between T1 (A1, C1 and E1) and T2 (A2, C2 and E2), for variables in the behaviours theme (95% confidence intervals in parentheses).

| <i>(a)</i>   |                     |                     |
|--------------|---------------------|---------------------|
| Trait        | A1                  | A2                  |
| Media use    | 0.454 (0.353,0.496) |                     |
| Media use    | 0.262 (0.192,0.349) | 0.178 (0.079,0.236) |
|              | C1                  | C2                  |
| Media use    | 0.000 (0.000,0.078) |                     |
| Media use    | 0.000 (0.000,0.065) | 0.000 (0.000,0.054) |
|              | E1                  | E2                  |
| Media use    | 0.543 (0.489,0.600) |                     |
| Media use    | 0.031 (0.016,0.051) | 0.535 (0.474,0.600) |
| <i>(b)</i>   |                     |                     |
| Trait        | A1                  | A2                  |
| Volunteering | 0.312 (0.209,0.358) |                     |
| Volunteering | 0.073 (0.039,0.174) | 0.255 (0.108,0.321) |
|              | C1                  | C2                  |
| Volunteering | 0.000 (0.000,0.076) |                     |
| Volunteering | 0.00 (-0.060,0.056) | 0.000 (0.000,0.055) |
|              | E1                  | E2                  |
| Volunteering | 0.659 (0.601,0.720) |                     |
| Volunteering | 0.025 (0.012,0.044) | 0.656 (0.581,0.750) |

*Note: Scores were corrected for mean age and sex differences (see Methods).*

**Supplementary Table 21.** Bivariate model fit indices

|                             | <b>base</b> | <b>comparison</b> | <b>ep</b> | <b>minus2LL</b> | <b>df</b> | <b>AIC</b> | <b>diffLL</b> | <b>diffdf</b> | <b>p</b> |
|-----------------------------|-------------|-------------------|-----------|-----------------|-----------|------------|---------------|---------------|----------|
| Healthcare                  | Sat         | <NA>              | 28        | 24260.62        | 8959      | 6342.62200 |               |               |          |
| Healthcare                  | Sat         | ACE               | 11        | 24354.20        | 8976      | 6402.19600 | 93.57320      | 17<.00100     | 0.00000  |
| Community satisfaction      | Sat         | <NA>              | 28        | 24346.90        | 8931      | 6484.90300 |               |               |          |
| Community satisfaction      | Sat         | ACE               | 11        | 24361.32        | 8948      | 6465.32100 | 14.41835      | 17<.00100     | 0.63730  |
| Achievement motivation      | Sat         | <NA>              | 28        | 23717.14        | 8962      | 5793.14300 |               |               |          |
| Achievement motivation      | Sat         | ACE               | 11        | 23748.20        | 8979      | 5790.20400 | 31.06116      | 17<.00100     | 0.01963  |
| Importance of relationships | Sat         | <NA>              | 28        | 23417.91        | 8963      | 5491.91400 |               |               |          |
| Importance of relationships | Sat         | ACE               | 11        | 23476.18        | 8980      | 5516.18100 | 58.26745      | 17<.00100     | 0.00000  |
| Depression                  | Sat         | <NA>              | 28        | 23671.89        | 8888      | 5895.89200 |               |               |          |
| Depression                  | Sat         | ACE               | 11        | 23720.46        | 8905      | 5910.45700 | 48.56479      | 17<.00100     | 0.00007  |
| Money attitudes             | Sat         | <NA>              | 28        | 24400.41        | 8810      | 6780.41400 |               |               |          |
| Money attitudes             | Sat         | ACE               | 11        | 24418.71        | 8827      | 6764.70700 | 18.29351      | 17<.00100     | 0.37055  |
| Purpose in life             | Sat         | <NA>              | 28        | 23004.94        | 8966      | 5072.93500 |               |               |          |
| Purpose in life             | Sat         | ACE               | 11        | 23034.71        | 8983      | 5068.71400 | 29.77842      | 17<.00100     | 0.02799  |
| Love and relationships      | Sat         | <NA>              | 28        | 24420.83        | 8883      | 6654.82800 |               |               |          |
| Love and relationships      | Sat         | ACE               | 11        | 24434.09        | 8900      | 6634.08700 | 13.25833      | 17<.00100     | 0.71873  |
| Conduct problems            | Sat         | <NA>              | 28        | 24185.75        | 8891      | 6403.75000 |               |               |          |
| Conduct problems            | Sat         | ACE               | 11        | 24207.22        | 8908      | 6391.21600 | 21.46592      | 17<.00100     | 0.20614  |
| Hyperactivity               | Sat         | <NA>              | 28        | 24153.29        | 8891      | 6371.29500 |               |               |          |
| Hyperactivity               | Sat         | ACE               | 11        | 24191.58        | 8908      | 6375.58100 | 38.28626      | 17<.00100     | 0.00224  |
| Peer problems               | Sat         | <NA>              | 28        | 36520.94        | 13526     | 9468.94000 |               |               |          |
| Peer problems               | Sat         | ACE               | 11        | 23575.74        | 8908      | 5759.74100 | 13.34099      | 17<.00100     | 0.71308  |
| Prosocial behaviour         | Sat         | <NA>              | 28        | 24161.20        | 8891      | 6379.19900 |               |               |          |
| Prosocial behaviour         | Sat         | ACE               | 11        | 24177.12        | 8908      | 6361.12100 | 15.92163      | 17<.00100     | 0.52940  |
| Alcohol freq x quant        | Sat         | <NA>              | 28        | 22728.22        | 8451      | 5826.21600 |               |               |          |
| Alcohol freq x quant        | Sat         | ACE               | 11        | 22755.08        | 8468      | 5819.07900 | 26.86278      | 17<.00100     | 0.06011  |

|                    |     |      |    |          |      |            |          |           |         |
|--------------------|-----|------|----|----------|------|------------|----------|-----------|---------|
| General anxiety    | Sat | <NA> | 28 | 22822.96 | 8633 | 5556.95900 |          |           |         |
| General anxiety    | Sat | ACE  | 11 | 22867.06 | 8650 | 5567.06300 | 44.10331 | 17<.00100 | 0.00033 |
| Physical activity  | Sat | <NA> | 28 | 23956.38 | 8879 | 6198.38100 |          |           |         |
| Physical activity  | Sat | ACE  | 11 | 23977.79 | 8896 | 6185.79100 | 21.40986 | 17<.00100 | 0.20849 |
| Media use          | Sat | <NA> | 28 | 23833.70 | 8862 | 6109.69600 |          |           |         |
| Media use          | Sat | ACE  | 11 | 23855.84 | 8879 | 6097.84000 | 22.14444 | 17<.00100 | 0.17923 |
| Volunteering       | Sat | <NA> | 28 | 24837.20 | 8883 | 7071.20100 |          |           |         |
| Volunteering       | Sat | ACE  | 11 | 24864.09 | 8900 | 7064.08800 | 26.88685 | 17<.00100 | 0.05975 |
| Emotional problems | Sat | <NA> | 28 | 23762.35 | 8891 | 5980.35500 |          |           |         |
| Emotional problems | Sat | ACE  | 11 | 23781.53 | 8908 | 5965.53100 | 19.17643 | 17<.00100 | 0.31850 |

Note: Scores were corrected for mean age and sex differences (see Methods).

**Supplementary Table 22.** For twins living together: T1 twin intraclass correlations and model fitting results for univariate analyses of additive genetic (A), shared environmental (C), and non-shared environmental (E) components of variance (95% confidence intervals in parentheses).

| Construct                   | T1             |          |          |          |          |          |          |          |          |              |              |              |
|-----------------------------|----------------|----------|----------|----------|----------|----------|----------|----------|----------|--------------|--------------|--------------|
|                             | MZ DZ combined |          |          | MZ       |          |          | DZ       |          |          | A            | C            | E            |
|                             | <i>r</i>       | <i>p</i> | <i>n</i> | <i>r</i> | <i>p</i> | <i>n</i> | <i>r</i> | <i>p</i> | <i>n</i> |              |              |              |
| Love and relationships      | .14            | .011     | 312      | .18      | .008     | 219      | -.03     | .713     | 218      | .18(.07-.24) | .00(.00-.00) | .82(.76-.87) |
| Achievement motivation      | .25            | <.001    | 331      | .47      | <.001    | 219      | .14      | .046     | 219      | .36(.26-.41) | .00(.00-.00) | .64(.59-.69) |
| Importance of Relationships | .25            | <.001    | 331      | .47      | <.001    | 219      | .07      | .304     | 219      | .38(.32-.43) | .00(.00-.02) | .62(.57-.67) |



|                                |     |       |     |     |       |     |     |       |     |              |              |              |
|--------------------------------|-----|-------|-----|-----|-------|-----|-----|-------|-----|--------------|--------------|--------------|
| Purpose in Life                | .32 | <.001 | 332 | .39 | <.001 | 218 | .27 | <.001 | 219 | .37(.22-.45) | .03(.00-.14) | .61(.55-.66) |
| Healthcare                     | .25 | <.001 | 332 | .37 | <.001 | 217 | .30 | <.001 | 216 | .36(.26-.41) | .00(.00-.07) | .64(.59-.69) |
| Community satisfaction         | .41 | <.001 | 332 | .46 | <.001 | 218 | .37 | <.001 | 218 | .13(.00-.26) | .29(.18-.39) | .58(.53-.63) |
| Attitudes towards money        | .18 | .001  | 332 | .35 | <.001 | 213 | .07 | .289  | 208 | .22(.15-.28) | .00(.00-.04) | .78(.72-.83) |
| Alcohol (frequency x quantity) | .41 | <.001 | 331 | .30 | <.001 | 428 | .14 | <.001 | 623 | .35(.25-.41) | .00(.00-.00) | .65(.59-.70) |
| Conduct problems               | .18 | .001  | 330 | .30 | <.001 | 470 | .16 | <.001 | 726 | .27(.17-.33) | .00(.00-.08) | .73(.67-.78) |
| Emotional problems             | .37 | <.001 | 330 | .38 | <.001 | 209 | .16 | .016  | 216 | .33(.18-.40) | .02(.00-.13) | .65(.60-.71) |
| Hyperactivity                  | .25 | <.001 | 330 | .48 | <.001 | 209 | .17 | .011  | 216 | .38(.29-.42) | .00(.00-.07) | .62(.58-.67) |
| Peer problems                  | .43 | <.001 | 330 | .33 | <.001 | 470 | .25 | <.001 | 726 | .29(.15-.43) | .09(.00-.20) | .61(.56-.67) |
| Prosocial behaviour            | .24 | <.001 | 330 | .30 | <.001 | 470 | .12 | .001  | 726 | .27(.15-.32) | .00(.00-.09) | .73(.68-.79) |
| General anxiety                | .35 | <.001 | 330 | .33 | <.001 | 207 | .24 | <.001 | 213 | .36(.28-.41) | .00(.00-.06) | .64(.59-.69) |
| Depression                     | .34 | <.001 | 330 | .32 | <.001 | 470 | .17 | <.001 | 726 | .29(.13-.39) | .05(.00-.16) | .67(.61-.72) |
| Physical activity              | .38 | <.001 | 329 | .55 | <.001 | 218 | .21 | .002  | 215 | .40(.29-.44) | .00(.00-.08) | .60(.56-.65) |
| Media use                      | .44 | <.001 | 329 | .64 | <.001 | 217 | .29 | <.001 | 209 | .45(.35-.50) | .00(.00-.08) | .55(.50-.60) |
| Volunteering                   | .28 | <.001 | 329 | .42 | <.001 | 209 | .21 | .002  | 216 | .32(.23-.37) | .00(.00-.00) | .68(.63-.73) |

Note: Scores were corrected for mean age and sex differences (see Methods).

**Supplementary Table 23.** For twins living together: T2 twin intraclass correlations and model fitting results for univariate analyses of additive genetic (A), shared environmental (C), and non-shared environmental (E) components of variance (95% confidence intervals in parentheses).

| Construct                      | T2             |          |          |          |          |          |          |          |          |               |               |               |
|--------------------------------|----------------|----------|----------|----------|----------|----------|----------|----------|----------|---------------|---------------|---------------|
|                                | MZ DZ combined |          |          | MZ       |          |          | DZ       |          |          | A             | C             | E             |
|                                | <i>r</i>       | <i>p</i> | <i>n</i> | <i>r</i> | <i>p</i> | <i>n</i> | <i>r</i> | <i>p</i> | <i>n</i> |               |               |               |
| Love and relationships         | .14            | .011     | 312      | .24      | .002     | 163      | .04      | .608     | 145      | .23 (.00-.36) | .00 (NA-.22)  | .77 (.64-.91) |
| Achievement motivation         | .25            | <.001    | 331      | .37      | <.001    | 176      | .10      | .215     | 151      | .36 (.23-.47) | .00 (.00-.19) | .64 (.53-.77) |
| Importance of Relationships    | .25            | <.001    | 331      | .40      | <.001    | 176      | .01      | .920     | 151      | .34 (.13-.44) | .00 (NA-.17)  | .66 (.56-.78) |
| Purpose in Life                | .32            | <.001    | 332      | .36      | <.001    | 177      | .29      | <.001    | 151      | .21 (.00-.51) | .19 (.00-.42) | .60 (.48-.74) |
| Healthcare                     | .25            | <.001    | 332      | .14      | .068     | 177      | .36      | <.001    | 151      | .00 (NA-.25)  | .29 (.18-.40) | .71 (.60-.82) |
| Community satisfaction         | .41            | <.001    | 332      | .48      | <.001    | 177      | .31      | <.001    | 151      | .28 (.00-.56) | .18 (.00-.45) | .54 (.44-.65) |
| Attitudes towards money        | .18            | .001     | 332      | .33      | <.001    | 177      | .01      | .943     | 151      | .26 (.06-.38) | .00 (NA-.14)  | .74 (.62-.87) |
| Alcohol (frequency x quantity) | .41            | <.001    | 331      | .50      | <.001    | 177      | .32      | <.001    | 150      | .39 (.07-.62) | .14 (.00-.40) | .47 (.38-.59) |
| Conduct problems               | .18            | .001     | 330      | .19      | .013     | 177      | .18      | .025     | 149      | .08 (NA-.34)  | .12 (.00-.28) | .80 (.66-.92) |
| Emotional problems             | .37            | <.001    | 330      | .46      | <.001    | 177      | .26      | .001     | 149      | .40 (.06-.57) | .07 (NA-.29)  | .53 (.43-.65) |
| Hyperactivity                  | .25            | <.001    | 330      | .34      | <.001    | 177      | .15      | .065     | 149      | .35 (.07-.47) | .00 (NA-.21)  | .65 (.53-.78) |

|                     |     |       |     |     |       |     |     |       |     |               |               |               |
|---------------------|-----|-------|-----|-----|-------|-----|-----|-------|-----|---------------|---------------|---------------|
| Peer problems       | .43 | <.001 | 330 | .52 | <.001 | 177 | .29 | <.001 | 149 | .36 (.02-.58) | .14 (.00-.42) | .51 (.41-.61) |
| Prosocial behaviour | .24 | <.001 | 330 | .40 | <.001 | 177 | .08 | .350  | 149 | .37 (.18-.48) | .00 (.00-.13) | .63 (.52-.76) |
| General anxiety     | .35 | <.001 | 330 | .51 | <.001 | 177 | .21 | .010  | 149 | .53 (.33-.62) | .00 (NA-.15)  | .47 (.38-.58) |
| Depression          | .34 | <.001 | 330 | .43 | <.001 | 177 | .22 | .007  | 149 | .46 (.14-.56) | .00 (.00-.26) | .54 (.44-.65) |
| Physical activity   | .38 | <.001 | 329 | .40 | <.001 | 176 | .34 | <.001 | 149 | .17 (.00-.50) | .25 (.00-.45) | .58 (.47-.70) |
| Media use           | .44 | <.001 | 329 | .58 | <.001 | 176 | .26 | .001  | 149 | .54 (.22-.63) | .01 (.00-.28) | .45 (.37-.55) |
| Volunteering        | .28 | <.001 | 329 | .40 | <.001 | 176 | .13 | .124  | 149 | .38 (.12-.49) | .00 (.00-.20) | .62 (.51-.74) |

Note: Scores were corrected for mean age and sex differences (see Methods).

**Supplementary Table 24.** For twins living together: T2 change twin intraclass correlations and model fitting results for univariate analyses of additive genetic (A), shared environmental (C), and non-shared environmental (E) components of variance (95% confidence intervals in parentheses).

| Construct                   | T2 change      |          |          |          |          |          |          |          |          |               |               |                |
|-----------------------------|----------------|----------|----------|----------|----------|----------|----------|----------|----------|---------------|---------------|----------------|
|                             | MZ DZ combined |          |          | MZ       |          |          | DZ       |          |          | A             | C             | E              |
|                             | <i>r</i>       | <i>p</i> | <i>n</i> | <i>r</i> | <i>p</i> | <i>n</i> | <i>r</i> | <i>p</i> | <i>n</i> |               |               |                |
| Love and relationships      | .09            | .142     | 282      | .20      | .017     | 150      | -.04     | .678     | 129      | .15 (.00-.29) | .00 (NA-.17)  | .85 (.71-.99)  |
| Achievement motivation      | .09            | .137     | 293      | .17      | .037     | 160      | -.04     | .680     | 130      | .12 (.00-.26) | .00 (.00-.16) | .88 (.74-1.00) |
| Importance of Relationships | .05            | .388     | 293      | .18      | .025     | 160      | -.11     | .218     | 130      | .11 (NA-.24)  | .00 (NA-.13)  | .89 (.76-NA)   |

|                                |     |       |     |     |       |     |     |      |     |               |               |               |
|--------------------------------|-----|-------|-----|-----|-------|-----|-----|------|-----|---------------|---------------|---------------|
| Purpose in Life                | .16 | .007  | 293 | .14 | .080  | 160 | .17 | .053 | 130 | .01 (.00-.31) | .15 (.00-.26) | .85 (.69-.96) |
| Healthcare                     | .17 | .003  | 292 | .05 | .573  | 159 | .27 | .002 | 130 | .00 (NA-.25)  | .18 (.00-.30) | .82 (.70-.94) |
| Community satisfaction         | .20 | <.001 | 294 | .28 | <.001 | 160 | .08 | .345 | 131 | .26 (.00-.38) | .00 (.00-.28) | .74 (.62-.88) |
| Attitudes towards money        | .17 | .003  | 286 | .30 | <.001 | 156 | .03 | .738 | 127 | .25 (.01-.38) | .00 (.00-.19) | .75 (.62-.89) |
| Alcohol (frequency x quantity) | .19 | .003  | 254 | .20 | .022  | 135 | .20 | .035 | 117 | .09 (NA-.38)  | .13 (.00-.31) | .78 (.62-.93) |
| Conduct problems               | .16 | .008  | 288 | .14 | .087  | 156 | .19 | .032 | 129 | .00 (NA-.30)  | .16 (.00-.27) | .84 (.73-.96) |
| Emotional problems             | .22 | <.001 | 288 | .32 | <.001 | 156 | .10 | .256 | 129 | .30 (.00-.42) | .00 (NA-.25)  | .70 (.58-.84) |
| Hyperactivity                  | .16 | .006  | 288 | .21 | .008  | 156 | .10 | .242 | 129 | .22 (.00-.36) | .00 (NA-.25)  | .78 (.64-.93) |
| Peer problems                  | .18 | .003  | 288 | .23 | .004  | 156 | .08 | .378 | 129 | .22 (.00-.35) | .00 (NA-.28)  | .78 (.65-.92) |
| Prosocial behaviour            | .13 | .028  | 288 | .23 | .005  | 156 | .04 | .656 | 129 | .19 (.00-.33) | .00 (NA-.19)  | .81 (.67-.95) |
| General anxiety                | .24 | <.001 | 289 | .38 | <.001 | 154 | .11 | .215 | 132 | .36 (.14-.49) | .00 (.00-.15) | .64 (.51-.78) |
| Depression                     | .21 | <.001 | 288 | .28 | <.001 | 156 | .11 | .200 | 129 | .27 (.00-.40) | .00 (.00-.25) | .73 (.60-.86) |
| Physical activity              | .21 | <.001 | 289 | .22 | .005  | 159 | .18 | .038 | 127 | .12 (.00-.39) | .12 (.00-.32) | .75 (.61-.90) |
| Media use                      | .29 | <.001 | 285 | .39 | <.001 | 158 | .15 | .089 | 124 | .38 (.07-.49) | .00 (.00-.24) | .62 (.51-.75) |
| Volunteering                   | .18 | .002  | 287 | .25 | .002  | 155 | .12 | .189 | 129 | .25 (.00-.38) | .00 (NA-.23)  | .75 (.62-.90) |

Note: Scores were corrected for mean age and sex differences (see Methods).

**Supplementary Table 25.** For twins living apart: T1 twin intraclass correlations and model fitting results for univariate analyses of additive genetic (A), shared environmental (C), and non-shared environmental (E) components of variance (95% confidence intervals in parentheses).

| Construct                      | T1             |       |     |     |       |     |     |       |     |                |               |               |
|--------------------------------|----------------|-------|-----|-----|-------|-----|-----|-------|-----|----------------|---------------|---------------|
|                                | MZ DZ combined |       |     | MZ  |       |     | DZ  |       |     | A              | C             | E             |
|                                | r              | p     | n   | r   | p     | n   | r   | p     | n   |                |               |               |
| Love and relationships         | .13            | <.001 | 810 | .16 | .001  | 482 | .08 | .032  | 736 | 0.16 (.00-.23) | .00 (.00-.15) | .84 (.77-.92) |
| Achievement motivation         | .29            | <.001 | 833 | .32 | <.001 | 483 | .19 | <.001 | 739 | 0.24 (.03-.39) | .08 (.00-.23) | .68 (.61-.76) |
| Importance of Relationships    | .26            | <.001 | 833 | .44 | <.001 | 483 | .14 | <.001 | 739 | 0.41 (.34-.47) | .00 (.00-.05) | .59 (.53-.66) |
| Purpose in Life                | .34            | <.001 | 836 | .37 | <.001 | 483 | .23 | <.001 | 739 | 0.32 (.12-.46) | .06 (.00-.21) | .61 (.54-.69) |
| Healthcare                     | .12            | .001  | 836 | .37 | <.001 | 484 | .17 | <.001 | 737 | 0.37 (.22-.44) | .00 (.00-.11) | .63 (.56-.70) |
| Community satisfaction         | .14            | <.001 | 836 | .41 | <.001 | 480 | .37 | <.001 | 730 | 0.13 (.00-.31) | .30 (.16-.42) | .57 (.51-.65) |
| Attitudes towards money        | .09            | .012  | 836 | .26 | <.001 | 463 | .03 | .420  | 692 | 0.21 (.14-.28) | .00 (.00-.06) | .79 (.72-.86) |
| Alcohol (frequency x quantity) | .25            | <.001 | 831 | .34 | <.001 | 184 | .17 | .003  | 324 | 0.35 (.14-.42) | .00 (.00-.15) | .65 (.58-.73) |
| Conduct problems               | .15            | <.001 | 831 | .18 | .006  | 222 | .05 | .302  | 389 | 0.28 (.07-.37) | .01 (.00-.17) | .70 (.63-.79) |
| Emotional problems             | .24            | <.001 | 831 | .33 | <.001 | 470 | .16 | <.001 | 726 | 0.33 (.12-.40) | .00 (.00-.15) | .67 (.60-.74) |
| Hyperactivity                  | .20            | <.001 | 831 | .33 | <.001 | 470 | .14 | <.001 | 726 | 0.33 (.18-.40) | .00 (.00-.10) | .67 (.60-.74) |

|                     |     |       |     |     |       |     |     |       |     |                |               |               |
|---------------------|-----|-------|-----|-----|-------|-----|-----|-------|-----|----------------|---------------|---------------|
| Peer problems       | .29 | <.001 | 831 | .38 | <.001 | 222 | .20 | <.001 | 389 | 0.20 (.00-.40) | .14 (.00-.29) | .66 (.58-.74) |
| Prosocial behaviour | .29 | <.001 | 831 | .24 | <.001 | 222 | .05 | .341  | 389 | 0.29 (.10-.36) | .00 (NA-.14)  | .71 (.64-.79) |
| General anxiety     | .27 | <.001 | 831 | .34 | <.001 | 446 | .12 | .003  | 666 | 0.32 (.24-.39) | .00 (.00-.08) | .68 (.61-.76) |
| Depression          | .24 | <.001 | 831 | .37 | <.001 | 222 | .19 | <.001 | 389 | 0.28 (.07-.39) | .03 (.00-.19) | .68 (.61-.77) |
| Physical activity   | .31 | <.001 | 831 | .36 | <.001 | 475 | .17 | <.001 | 723 | 0.36 (.29-.43) | .00 (.00-.14) | .64 (.57-.71) |
| Media use           | .27 | <.001 | 831 | .42 | <.001 | 475 | .19 | <.001 | 723 | 0.42 (.27-.48) | .00 (.00-.11) | .58 (.52-.65) |
| Volunteering        | .20 | <.001 | 831 | .35 | <.001 | 470 | .14 | <.001 | 726 | 0.32 (.18-.39) | .00 (.00-.11) | .68 (.61-.75) |

Note: Scores were corrected for mean age and sex differences (see Methods).

**Supplementary Table 26.** For twins living apart: T2 twin intraclass correlations and model fitting results for univariate analyses of additive genetic (A), shared environmental (C), and non-shared environmental (E) components of variance (95% confidence intervals in parentheses).

| Construct              | T2             |       |     |     |       |     |     |       |     |               |               |               |
|------------------------|----------------|-------|-----|-----|-------|-----|-----|-------|-----|---------------|---------------|---------------|
|                        | MZ DZ combined |       |     | MZ  |       |     | DZ  |       |     | A             | C             | E             |
|                        | r              | p     | n   | r   | p     | n   | r   | p     | n   |               |               |               |
| Love and relationships | .13            | <.001 | 810 | .23 | <.001 | 362 | .05 | .300  | 442 | .19 (.03-.28) | .00 (.00-.12) | .81 (.72-.90) |
| Achievement motivation | .29            | <.001 | 833 | .40 | <.001 | 367 | .20 | <.001 | 460 | .37 (.13-.46) | .02 (.00-.20) | .61 (.54-.70) |

|                                |     |       |     |     |       |     |     |       |     |               |               |               |
|--------------------------------|-----|-------|-----|-----|-------|-----|-----|-------|-----|---------------|---------------|---------------|
| Importance of Relationships    | .26 | <.001 | 833 | .36 | <.001 | 367 | .18 | <.001 | 460 | .36 (.12-.43) | .00 (.00-.19) | .64 (.57-.72) |
| Purpose in Life                | .34 | <.001 | 836 | .46 | <.001 | 370 | .25 | <.001 | 460 | .49 (.27-.55) | .00 (.00-.17) | .51 (.45-.59) |
| Healthcare                     | .12 | .001  | 836 | .22 | <.001 | 370 | .01 | .757  | 460 | .19 (.04-.27) | .00 (.00-.11) | .81 (.73-.90) |
| Community satisfaction         | .14 | <.001 | 836 | .21 | <.001 | 370 | .06 | .170  | 460 | .20 (.03-.28) | .00 (.00-.11) | .80 (.72-.90) |
| Attitudes towards money        | .09 | .012  | 836 | .11 | .030  | 370 | .06 | .171  | 460 | .11 (.00-.20) | .00 (.00-.13) | .89 (.80-.98) |
| Alcohol (frequency x quantity) | .25 | <.001 | 831 | .33 | <.001 | 368 | .18 | <.001 | 457 | .36 (.11-.45) | .01 (.00-.20) | .63 (.55-.73) |
| Conduct problems               | .15 | <.001 | 831 | .16 | .002  | 368 | .14 | .002  | 457 | .00 (.00-.25) | .18 (.00-.25) | .82 (.75-.89) |
| Emotional problems             | .24 | <.001 | 831 | .35 | <.001 | 368 | .17 | <.001 | 457 | .35 (.13-.42) | .00 (.00-.16) | .65 (.58-.73) |
| Hyperactivity                  | .20 | <.001 | 831 | .37 | <.001 | 368 | .06 | .172  | 457 | .33 (.23-.41) | .00 (.00-.06) | .67 (.59-.75) |
| Peer problems                  | .29 | <.001 | 831 | .39 | <.001 | 368 | .20 | <.001 | 457 | .33 (.08-.46) | .05 (.00-.24) | .62 (.54-.71) |
| Prosocial behaviour            | .29 | <.001 | 831 | .33 | <.001 | 368 | .24 | <.001 | 457 | .19 (.00-.40) | .14 (.00-.31) | .67 (.59-.77) |
| General anxiety                | .27 | <.001 | 831 | .37 | <.001 | 368 | .19 | <.001 | 457 | .39 (.19-.47) | .00 (.00-.15) | .61 (.53-.69) |
| Depression                     | .24 | <.001 | 831 | .35 | <.001 | 368 | .16 | .001  | 457 | .35 (.27-.43) | .00 (.00-.14) | .65 (.57-.73) |
| Physical activity              | .31 | <.001 | 831 | .40 | <.001 | 368 | .24 | <.001 | 457 | .35 (.11-.49) | .07 (.00-.25) | .58 (.51-.67) |
| Media use                      | .27 | <.001 | 831 | .44 | <.001 | 368 | .09 | .057  | 457 | .38 (.28-.45) | .00 (.00-.06) | .62 (.55-.70) |

|              |     |       |     |     |       |     |     |      |     |               |              |               |
|--------------|-----|-------|-----|-----|-------|-----|-----|------|-----|---------------|--------------|---------------|
| Volunteering | .20 | <.001 | 831 | .37 | <.001 | 368 | .08 | .082 | 457 | .34 (.23-.42) | .00 (NA-.07) | .66 (.58-.75) |
|--------------|-----|-------|-----|-----|-------|-----|-----|------|-----|---------------|--------------|---------------|

Note: Scores were corrected for mean age and sex differences (see Methods).

**Supplementary Table 27.** For twins living apart: T2 change twin intraclass correlations and model fitting results for univariate analyses of additive genetic (A), shared environmental (C), and non-shared environmental (E) components of variance (95% confidence intervals in parentheses).

| Construct                   | T2 change      |      |     |     |      |     |      |      |     |               |               |                |
|-----------------------------|----------------|------|-----|-----|------|-----|------|------|-----|---------------|---------------|----------------|
|                             | MZ DZ combined |      |     | MZ  |      |     | DZ   |      |     | A             | C             | E              |
|                             | r              | p    | n   | r   | p    | n   | r    | p    | n   |               |               |                |
| Love and relationships      | .10            | .006 | 739 | .15 | .007 | 332 | .06  | .237 | 401 | .13 (.00-.22) | .00 (.00-.16) | .87 (.78-.96)  |
| Achievement motivation      | .12            | .001 | 752 | .16 | .004 | 332 | .09  | .066 | 414 | .14 (.00-.25) | .02 (NA-.18)  | .84 (.75-.94)  |
| Importance of Relationships | .05            | .146 | 752 | .07 | .228 | 332 | .05  | .320 | 414 | .04 (.00-.17) | .03 (.00-.13) | .93 (.83-1.00) |
| Purpose in Life             | .11            | .003 | 755 | .13 | .015 | 335 | .10  | .050 | 414 | .07 (.00-.23) | .06 (.00-.18) | .87 (.77-.96)  |
| Healthcare                  | .06            | .119 | 755 | .13 | .017 | 336 | -.02 | .767 | 413 | .09 (.00-.19) | .00 (.00-.11) | .91 (.81-1.00) |
| Community satisfaction      | .05            | .165 | 761 | .16 | .003 | 339 | -.05 | .269 | 416 | .10 (.00-.20) | .00 (NA-.07)  | .90 (.80-1.00) |
| Attitudes towards money     | .01            | .770 | 731 | .03 | .601 | 332 | -.01 | .796 | 394 | .01 (NA-.11)  | .00 (.00-.07) | .99 (.89-1.00) |



|                                      |     |       |     |     |       |     |      |       |     |               |               |                |
|--------------------------------------|-----|-------|-----|-----|-------|-----|------|-------|-----|---------------|---------------|----------------|
| Alcohol<br>(frequency x<br>quantity) | .08 | .037  | 667 | .20 | .001  | 307 | -.02 | .746  | 356 | .18 (.04-.27) | .00 (.00-.09) | .82 (.73-.93)  |
| Conduct<br>problems                  | .11 | .002  | 742 | .14 | .013  | 328 | .10  | .047  | 409 | .08 (.00-.24) | .05 (.00-.18) | .86 (.76-.96)  |
| Emotional<br>problems                | .12 | .001  | 742 | .21 | <.001 | 328 | .04  | .378  | 409 | .19 (.02-.28) | .00 (.00-.12) | .81 (.72-.91)  |
| Hyperactivity                        | .14 | <.001 | 742 | .19 | <.001 | 328 | .09  | .075  | 409 | .19 (.00-.28) | .00 (.00-.18) | .81 (.72-.90)  |
| Peer problems                        | .12 | .001  | 742 | .17 | .002  | 328 | .08  | .118  | 409 | .16 (NA-.25)  | .00 (.00-.18) | .84 (.75-.94)  |
| Prosocial<br>behaviour               | .14 | <.001 | 742 | .11 | .054  | 328 | .17  | .001  | 409 | .00 (.00-.18) | .14 (.00-.21) | .86 (.79-.93)  |
| General<br>anxiety                   | .13 | <.001 | 708 | .19 | .001  | 321 | .10  | .051  | 381 | .20 (.00-.29) | .00 (.00-.18) | .80 (.71-.90)  |
| Depression                           | .07 | .073  | 742 | .06 | .248  | 328 | .07  | .159  | 409 | .00 (.00-.17) | .07 (.00-.14) | .93 (.86-1.00) |
| Physical<br>activity                 | .21 | <.001 | 751 | .25 | <.001 | 334 | .17  | <.001 | 411 | .18 (.00-.36) | .08 (.00-.27) | .74 (.64-.84)  |
| Media use                            | .14 | <.001 | 751 | .28 | <.001 | 335 | .00  | .957  | 410 | .21 (.13-.30) | .00 (.00-.09) | .79 (.70-.87)  |
| Volunteering                         | .17 | <.001 | 742 | .34 | <.001 | 328 | .06  | .245  | 409 | .30 (.21-.39) | .00 (.00-.07) | .70 (.61-.79)  |

*Note: Scores were corrected for mean age and sex differences (see Methods).*

**Supplementary Table 28.** Male model fitting results for univariate analyses of additive genetic (A), shared environmental (C), and non-shared environmental (E) components of variance (95% confidence intervals in parentheses).

| Construct                      | T1            |               |               | T2            |               |               | T2 change     |               |                |
|--------------------------------|---------------|---------------|---------------|---------------|---------------|---------------|---------------|---------------|----------------|
|                                | A             | C             | E             | A             | C             | E             | A             | C             | E              |
| Love and relationships         | .19 (.00-.29) | .00 (.00-.16) | .81 (.71-.91) | .06 (.00-.28) | .07 (.00-.21) | .87 (.72-.99) | .00 (.00-.27) | .13 (.00-.24) | .87 (.73-.98)  |
| Achievement motivation         | .37 (.10-.46) | .01 (.00-.20) | .62 (.54-.73) | .33 (.00-.54) | .09 (.00-.36) | .58 (.46-.73) | .08 (.00-.26) | .02 (.00-.19) | .90 (.74-1.00) |
| Importance of Relationships    | .41 (.30-.49) | .00 (.00-.05) | .59 (.51-.69) | .36 (.04-.47) | .00 (.00-.26) | .64 (.53-.76) | .16 (.00-.30) | .00 (.00-.00) | .84 (.70-.98)  |
| Purpose in Life                | .25 (.00-.47) | .14 (.00-.32) | .62 (.52-.72) | .13 (.00-.48) | .25 (.00-.42) | .62 (.50-.74) | .10 (.00-.25) | .01 (.00-.20) | .89 (.75-1.00) |
| Healthcare                     | .37 (.12-.45) | .00 (.00-.00) | .63 (.55-.73) | .00 (.00-.25) | .29 (.19-.37) | .71 (.63-.81) | .00 (.00-.24) | .20 (.00-.29) | .80 (.70-.89)  |
| Community satisfaction         | .14 (.00-.37) | .29 (.12-.43) | .57 (.48-.67) | .27 (.00-.39) | .00 (NA-.27)  | .73 (.61-.89) | .08 (.00-.23) | .00 (.00-.14) | .92 (.77-1.00) |
| Attitudes towards money        | .15 (.00-.25) | .00 (.00-.00) | .85 (.75-.94) | .19 (.00-.31) | .00 (.00-.13) | .81 (.69-.95) | .15 (.00-.29) | .00 (NA-NA)   | .85 (.71-.99)  |
| Alcohol (frequency x quantity) | .23 (.00-.42) | .09 (.00-.30) | .68 (.58-.79) | .20 (.00-.53) | .24 (.00-.45) | .56 (.45-.68) | .23 (.00-.44) | .07 (.00-.34) | .70 (.56-.87)  |
| Conduct problems               | .31 (.14-.39) | .00 (.00-.11) | .69 (.61-.79) | .00 (.00-.32) | .24 (.00-.34) | .76 (.66-.87) | .00 (.00-.24) | .10 (.00-.22) | .90 (.76-1.00) |

|                     |               |               |               |               |               |               |               |               |                |
|---------------------|---------------|---------------|---------------|---------------|---------------|---------------|---------------|---------------|----------------|
| Emotional problems  | .12 (.00-.36) | .14 (.00-.28) | .74 (.64-.84) | .36 (.00-.48) | .00 (.00-.25) | .64 (.52-.80) | .00 (.00-.27) | .10 (.00-.21) | .90 (.73-1.00) |
| Hyperactivity       | .32 (.09-.41) | .00 (.00-.16) | .68 (.59-.79) | .34 (.14-.46) | .00 (.00-.14) | .66 (.54-.79) | .23 (.00-.43) | .05 (.00-.30) | .71 (.57-.87)  |
| Peer problems       | .35 (.08-.46) | .02 (.00-.22) | .63 (.54-.74) | .09 (.00-.44) | .23 (.00-.39) | .68 (.55-.80) | .00 (.00-.23) | .12 (.00-.23) | .88 (.76-1.00) |
| Prosocial behaviour | .34 (.09-.42) | .00 (.00-.18) | .66 (.58-.76) | .45 (.19-.54) | .00 (.00-.19) | .55 (.46-.67) | .22 (.00-.36) | .00 (.00-.21) | .78 (.64-.94)  |
| General anxiety     | .34 (.09-.44) | .00 (.00-.17) | .66 (.56-.78) | .42 (.18-.54) | .00 (.00-.15) | .58 (.46-.73) | .03 (.00-.22) | .00 (.00-.13) | .97 (.78-1.00) |
| Depression          | .25 (.00-.34) | .00 (.00-.19) | .75 (.66-.87) | .43 (.19-.55) | .00 (.00-.15) | .57 (.45-.72) | .30 (.00-.46) | .00 (.00-.19) | .70 (.54-.89)  |
| Physical activity   | .34 (.15-.43) | .00 (.00-.14) | .66 (.57-.75) | .32 (.00-.47) | .02 (NA-.31)  | .65 (.53-.81) | .17 (.00-.33) | .02 (.00-.25) | .81 (.67-.97)  |
| Media use           | .52 (.38-.59) | .00 (.00-.10) | .48 (.41-.57) | .36 (.18-.47) | .00 (.00-.13) | .64 (.53-.76) | .19 (.00-.32) | .00 (.00-.19) | .81 (.68-.95)  |
| Volunteering        | .38 (.19-.46) | .00 (.00-.13) | .62 (.54-.72) | .47 (.27-.57) | .00 (.00-.14) | .53 (.43-.65) | .39 (.21-.51) | .00 (.00-.11) | .61 (.49-.75)  |

Note: Scores were corrected for mean age and sex differences (see Methods).

**Supplementary Table 29.** Female model fitting results for univariate analyses of additive genetic (A), shared environmental (C), and non-shared environmental (E) components of variance (95% confidence intervals in parentheses).

| Construct              | T1            |               |               | T2            |               |               | T2 change     |               |               |
|------------------------|---------------|---------------|---------------|---------------|---------------|---------------|---------------|---------------|---------------|
|                        | A             | C             | E             | A             | C             | E             | A             | C             | E             |
| Love and relationships | .18 (.03-.24) | .00 (.00-.11) | .82 (.76-.89) | .26 (.12-.34) | .00 (.00-.09) | .74 (.66-.83) | .15 (.00-.24) | .00 (.00-.11) | .85 (.76-.94) |

|                                |               |               |               |               |               |                |               |               |                 |
|--------------------------------|---------------|---------------|---------------|---------------|---------------|----------------|---------------|---------------|-----------------|
| Achievement motivation         | .34 (.24-.40) | .00 (.00-.07) | .66 (.60-.72) | .36 (.28-.43) | .00 (.00-.11) | .64 (.57-.72)  | .17 (.00-.26) | .00 (.00-.16) | .83 (.74-.92)   |
| Importance of Relationships    | .35 (.28-.41) | .00 (.00-.00) | .65 (.59-.71) | .34 (.17-.41) | .00 (.00-.13) | .66 (.59-.73)  | .05 (.00-.14) | .00 (.00-.10) | .95 (.86-1.00)  |
| Purpose in Life                | .39 (.25-.45) | .00 (.00-.11) | .61 (.55-.67) | .49 (.42-.55) | .00 (.00-.15) | .51 (.45-.58)  | .04 (.00-.25) | .11 (.00-.21) | .85 (.75-.93)   |
| Healthcare                     | .34 (.23-.40) | .00 (.00-.00) | .66 (.60-.72) | .12 (.00-.23) | .00 (.00-.14) | .88 (.77-1.00) | .00 (.00-.11) | .00 (.00-.07) | 1.00 (.89-1.00) |
| Community satisfaction         | .14 (.00-.30) | .28 (.15-.40) | .58 (.52-.64) | .30 (.15-.38) | .00 (.00-.11) | .70 (.62-.79)  | .17 (.05-.26) | .00 (.00-.08) | .83 (.74-.93)   |
| Attitudes towards money        | .26 (.17-.32) | .00 (.00-.05) | .74 (.68-.81) | .15 (.00-.23) | .00 (.00-.15) | .85 (.77-.94)  | .06 (.00-.16) | .00 (.00-.11) | .94 (.84-1.00)  |
| Alcohol (frequency x quantity) | .36 (.26-.42) | .00 (.00-.00) | .64 (.58-.71) | .39 (.23-.47) | .00 (.00-.12) | .61 (.53-.69)  | .14 (.00-.24) | .00 (.00-.09) | .86 (.76-.96)   |
| Conduct problems               | .26 (.08-.32) | .00 (.00-.13) | .74 (.68-.82) | .08 (.00-.29) | .11 (.00-.24) | .81 (.71-.89)  | .12 (.00-.27) | .06 (.00-.21) | .83 (.73-.93)   |
| Emotional problems             | .38 (.24-.44) | .00 (.00-.11) | .62 (.56-.68) | .40 (.17-.47) | .01 (.00-.19) | .59 (.53-.67)  | .25 (.13-.34) | .00 (.00-.09) | .75 (.66-.84)   |
| Hyperactivity                  | .40 (.29-.46) | .00 (.00-.08) | .60 (.54-.66) | .34 (.22-.41) | .00 (.00-.08) | .66 (.59-.75)  | .16 (.00-.25) | .00 (.00-.15) | .84 (.75-.93)   |
| Peer problems                  | .27 (.09-.44) | .13 (.00-.26) | .61 (.55-.67) | .46 (.23-.52) | .00 (.00-.19) | .54 (.48-.61)  | .21 (.03-.29) | .00 (.00-.14) | .79 (.71-.88)   |

|                     |               |               |               |               |               |               |               |               |               |
|---------------------|---------------|---------------|---------------|---------------|---------------|---------------|---------------|---------------|---------------|
| Prosocial behaviour | .22 (.08-.28) | .00 (.00-.10) | .78 (.72-.84) | .24 (.00-.38) | .06 (.00-.26) | .70 (.62-.79) | .00 (.00-.19) | .14 (.00-.21) | .86 (.79-.93) |
| General anxiety     | .37 (.27-.43) | .00 (.00-.08) | .63 (.57-.69) | .45 (.37-.52) | .00 (.00-.15) | .55 (.48-.63) | .31 (.11-.39) | .00 (.00-.15) | .69 (.61-.78) |
| Depression          | .27 (.09-.42) | .09 (.00-.24) | .64 (.58-.70) | .39 (.16-.46) | .00 (.00-.18) | .61 (.54-.69) | .05 (.00-.20) | .05 (.00-.16) | .89 (.80-.98) |
| Physical activity   | .42 (.27-.48) | .00 (.00-.12) | .58 (.52-.64) | .27 (.04-.49) | .17 (.00-.35) | .56 (.49-.64) | .17 (.00-.38) | .13 (.00-.30) | .71 (.61-.81) |
| Media use           | .42 (.26-.48) | .00 (.00-.13) | .58 (.52-.64) | .47 (.33-.53) | .00 (.00-.11) | .53 (.47-.60) | .30 (.16-.37) | .00 (.00-.10) | .70 (.63-.79) |
| Volunteering        | .30 (.19-.35) | .00 (.00-.00) | .70 (.65-.77) | .30 (.18-.38) | .00 (.00-.07) | .70 (.62-.79) | .24 (.14-.33) | .00 (.00-.10) | .76 (.67-.86) |

Note: Scores were corrected for mean age and sex differences (see Methods).

**Supplementary Table 30.** Model fitting results for univariate analyses of additive genetic (A), shared environmental (C), and non-shared environmental (E) components of variance (95% confidence intervals in parentheses) for variables corrected for variation in SES.

| Construct                   | T1            |               |               | T2            |               |               | T2 change     |               |               |
|-----------------------------|---------------|---------------|---------------|---------------|---------------|---------------|---------------|---------------|---------------|
|                             | A             | C             | E             | A             | C             | E             | A             | C             | E             |
| Love and relationships      | .18 (.06-.24) | .00 (.00-.09) | .82 (.76-.88) | .23 (.06-.31) | .00 (.00-.13) | .77 (.69-.84) | .16 (.00-.24) | .00 (.00-.15) | .84 (.76-.90) |
| Achievement motivation      | .37 (.26-.42) | .00 (.00-.07) | .63 (.58-.69) | .38 (.31-.45) | .00 (.00-.14) | .62 (.55-.69) | .14 (.00-.22) | .00 (.00-.14) | .86 (.78-.95) |
| Importance of Relationships | .39 (.34-.44) | .00 (.00-.00) | .61 (.56-.66) | .36 (.21-.42) | .00 (.00-.12) | .64 (.58-.71) | .09 (.00-.18) | .00 (.00-.10) | .91 (.82-.99) |

|                                |               |               |               |               |               |               |               |               |                |
|--------------------------------|---------------|---------------|---------------|---------------|---------------|---------------|---------------|---------------|----------------|
| Purpose in Life                | .36 (.21-.45) | .04 (.00-.15) | .61 (.55-.66) | .44 (.25-.54) | .04 (.00-.19) | .52 (.46-.59) | .08 (.00-.25) | .09 (.00-.20) | .84 (.75-.92)  |
| Healthcare                     | .36 (.27-.42) | .00 (.00-.06) | .64 (.58-.69) | .16 (.00-.30) | .06 (.00-.22) | .78 (.70-.87) | .08 (.00-.20) | .03 (.00-.15) | .89 (.80-.97)  |
| Community satisfaction         | .13 (.00-.27) | .28 (.18-.39) | .59 (.53-.64) | .29 (.16-.36) | .00 (.00-.09) | .71 (.64-.79) | .14 (.04-.22) | .00 (.00-.06) | .86 (.78-.95)  |
| Attitudes towards money        | .22 (.15-.27) | .00 (.00-.04) | .78 (.73-.84) | .15 (.03-.23) | .00 (.00-.09) | .85 (.77-.92) | .08 (.00-.16) | .00 (.00-.09) | .92 (.84-1.00) |
| Alcohol (frequency x quantity) | .36 (.23-.41) | .00 (.00-.09) | .64 (.59-.70) | .43 (.23-.49) | .00 (.00-.15) | .57 (.51-.64) | .21 (.07-.29) | .00 (.00-.09) | .79 (.71-.88)  |
| Conduct problems               | .23 (.11-.29) | .00 (.00-.09) | .77 (.71-.83) | .09 (.00-.30) | .13 (.00-.25) | .78 (.69-.86) | .05 (.00-.24) | .10 (.00-.20) | .85 (.76-.93)  |
| Emotional problems             | .33 (.18-.39) | .01 (.00-.13) | .66 (.61-.72) | .38 (.25-.45) | .00 (.00-.12) | .62 (.55-.68) | .23 (.11-.31) | .00 (.00-.09) | .77 (.69-.85)  |
| Hyperactivity                  | .35 (.26-.41) | .00 (.00-.07) | .65 (.59-.70) | .34 (.26-.41) | .00 (.00-.05) | .66 (.59-.74) | .20 (.02-.28) | .00 (.00-.13) | .80 (.72-.88)  |
| Peer problems                  | .30 (.15-.41) | .05 (.00-.17) | .64 (.59-.70) | .40 (.19-.47) | .00 (NA-.17)  | .60 (.53-.67) | .14 (.00-.24) | .02 (.00-.18) | .84 (.76-.93)  |
| Prosocial behaviour            | .26 (.15-.32) | .00 (.00-.08) | .74 (.68-.79) | .36 (.29-.42) | .00 (.00-.14) | .64 (.58-.71) | .06 (.00-.24) | .10 (.00-.20) | .85 (.76-.92)  |
| General anxiety                | .37 (.27-.42) | .00 (.00-.07) | .63 (.58-.69) | .44 (.37-.50) | .00 (.00-.08) | .56 (.50-.63) | .25 (.10-.34) | .00 (.00-.08) | .75 (.66-.83)  |
| Depression                     | .27 (.11-.37) | .04 (.00-.17) | .68 (.63-.74) | .39 (.28-.46) | .00 (.00-.08) | .61 (.54-.68) | .17 (.05-.25) | .00 (.00-.15) | .83 (.75-.91)  |

|                   |               |               |               |               |               |               |               |               |               |
|-------------------|---------------|---------------|---------------|---------------|---------------|---------------|---------------|---------------|---------------|
| Physical activity | .38 (.26-.43) | .00 (.00-.09) | .62 (.57-.67) | .26 (.06-.46) | .13 (.00-.29) | .60 (.53-.68) | .13 (.00-.33) | .12 (.00-.27) | .75 (.67-.84) |
| Media use         | .47 (.40-.51) | .00 (.00-.04) | .53 (.49-.58) | .45 (.38-.50) | .00 (.00-.07) | .55 (.50-.62) | .29 (.18-.36) | .00 (.00-.08) | .71 (.64-.78) |
| Volunteering      | .32 (.24-.37) | .00 (.00-.00) | .68 (.63-.73) | .36 (.29-.43) | .00 (.00-.05) | .64 (.57-.71) | .29 (.19-.37) | .00 (.00-.06) | .71 (.63-.79) |

Note: Scores were corrected for mean age and sex differences (see Methods).

**Supplementary Table 31.** Model fitting results for univariate analyses of additive genetic (A), shared environmental (C), and non-shared environmental (E) components of variance (95% confidence intervals in parentheses) for variables corrected for variation in job/financial difficulties.

| Construct                   | T2            |               |               | T2 change     |               |                |
|-----------------------------|---------------|---------------|---------------|---------------|---------------|----------------|
|                             | A             | C             | E             | A             | C             | E              |
| Love and relationships      | .22 (.08-.29) | .00 (.00-.08) | .78 (.71-.86) | .15 (.00-.23) | .00 (.00-.13) | .85 (.77-.93)  |
| Achievement motivation      | .40 (.23-.46) | .00 (.00-.13) | .60 (.54-.67) | .16 (.00-.23) | .00 (.00-.14) | .84 (.77-.93)  |
| Importance of Relationships | .36 (.21-.42) | .00 (.00-.12) | .64 (.58-.71) | .09 (.00-.17) | .00 (.00-.10) | .91 (.83-.99)  |
| Purpose in Life             | .41 (.21-.52) | .05 (.00-.21) | .54 (.48-.61) | .11 (.00-.24) | .05 (.00-.18) | .84 (.76-.93)  |
| Healthcare                  | .17 (.00-.32) | .06 (.00-.23) | .76 (.68-.86) | .11 (.00-.22) | .02 (.00-.16) | .87 (.78-.96)  |
| Community satisfaction      | .28 (.20-.35) | .00 (.00-.10) | .72 (.65-.80) | .14 (.04-.22) | .00 (.00-.00) | .86 (.78-.95)  |
| Attitudes towards money     | .15 (.02-.22) | .00 (.00-.10) | .85 (.78-.92) | .07 (.00-.16) | .00 (.00-.09) | .93 (.84-1.00) |

|                                |               |               |               |               |               |               |
|--------------------------------|---------------|---------------|---------------|---------------|---------------|---------------|
| Alcohol (frequency x quantity) | .43 (.23-.49) | .00 (.00-.15) | .57 (.51-.64) | .20 (.08-.29) | .00 (.00-.00) | .80 (.71-.89) |
| Conduct problems               | .00 (.00-.21) | .19 (.02-.24) | .81 (.76-.88) | .04 (.00-.24) | .12 (.00-.21) | .84 (.76-.92) |
| Emotional problems             | .39 (.22-.45) | .00 (.00-.13) | .61 (.55-.68) | .23 (.10-.30) | .00 (.00-.09) | .77 (.70-.85) |
| Hyperactivity                  | .33 (.24-.40) | .00 (.00-.06) | .67 (.60-.74) | .21 (.01-.29) | .00 (.00-.00) | .79 (.71-.87) |
| Peer problems                  | .37 (.17-.47) | .05 (.00-.21) | .59 (.53-.66) | .19 (.00-.26) | .00 (.00-.00) | .81 (.74-.90) |
| Prosocial behaviour            | .34 (.13-.42) | .02 (.00-.18) | .64 (.58-.72) | .06 (.00-.26) | .11 (.00-.21) | .83 (.74-.91) |
| General anxiety                | .43 (.29-.49) | .00 (.00-.10) | .57 (.51-.64) | .26 (.12-.34) | .00 (.00-.00) | .74 (.66-.82) |
| Depression                     | .38 (.24-.44) | .00 (.00-.11) | .62 (.56-.69) | .13 (.00-.23) | .02 (.00-.17) | .85 (.77-.94) |
| Physical activity              | .30 (.10-.48) | .12 (.00-.27) | .58 (.52-.65) | .14 (.00-.34) | .12 (.00-.27) | .74 (.66-.83) |
| Media use                      | .43 (.37-.49) | .00 (.00-.07) | .57 (.51-.63) | .26 (.15-.33) | .00 (.00-.08) | .74 (.67-.81) |
| Volunteering                   | .34 (.26-.40) | .00 (.00-.06) | .66 (.60-.74) | .28 (.18-.35) | .00 (.00-.06) | .72 (.65-.80) |

Note: Scores were corrected for mean age and sex differences (see Methods).

**Supplementary Table 32.** Model fitting results for univariate analyses of additive genetic (A), shared environmental (C), and non-shared environmental (E) components of variance (95% confidence intervals in parentheses) for variables corrected for variation in garden access during the lockdown.

| Construct              | T2            |               |               | T2 change     |             |               |
|------------------------|---------------|---------------|---------------|---------------|-------------|---------------|
|                        | A             | C             | E             | A             | C           | E             |
| Love and relationships | .23 (.09-.30) | .00 (.00-.00) | .77 (.70-.84) | .15 (.00-.23) | .00 (NA-NA) | .85 (.77-.92) |



|                                |               |               |               |               |               |               |
|--------------------------------|---------------|---------------|---------------|---------------|---------------|---------------|
| Achievement motivation         | .38 (.22-.44) | .00 (.00-.13) | .62 (.56-.68) | .15 (.00-.23) | .00 (.00-.14) | .85 (.77-.93) |
| Importance of Relationships    | .36 (.22-.42) | .00 (.00-.11) | .64 (.58-.71) | .10 (.00-.17) | .00 (.00-.00) | .90 (.83-.98) |
| Purpose in Life                | .41 (.22-.52) | .05 (.00-.20) | .54 (.48-.61) | .05 (.00-.23) | .09 (.00-.18) | .86 (.77-.94) |
| Healthcare                     | .14 (.00-.30) | .07 (.00-.23) | .79 (.70-.87) | .08 (.00-.20) | .03 (.00-.15) | .89 (.80-.97) |
| Community satisfaction         | .28 (.14-.35) | .00 (.00-.10) | .72 (.65-.79) | .14 (.04-.22) | .00 (.00-.00) | .86 (.78-.94) |
| Attitudes towards money        | .16 (.03-.23) | .00 (.00-.09) | .84 (.77-.91) | .09 (.00-.17) | .00 (.00-.09) | .91 (.83-.99) |
| Alcohol (frequency x quantity) | .40 (.20-.49) | .02 (.00-.18) | .58 (.51-.65) | .19 (.06-.28) | .00 (.00-.00) | .81 (.72-.89) |
| Conduct problems               | .01 (.00-.24) | .19 (.01-.25) | .81 (.72-.87) | .04 (.00-.23) | .10 (.00-.19) | .86 (.77-.93) |
| Emotional problems             | .39 (.21-.45) | .00 (.00-.15) | .61 (.55-.68) | .22 (.10-.30) | .00 (.00-.00) | .78 (.70-.85) |
| Hyperactivity                  | .34 (.25-.40) | .00 (.00-.05) | .66 (.60-.73) | .20 (.01-.28) | .00 (.00-.15) | .80 (.72-.88) |
| Peer problems                  | .35 (.16-.48) | .07 (.00-.23) | .58 (.52-.65) | .18 (.00-.26) | .00 (.00-.18) | .82 (.74-.90) |
| Prosocial behaviour            | .35 (.14-.42) | .01 (.00-.17) | .65 (.58-.72) | .03 (.00-.23) | .12 (.00-.20) | .85 (.77-.92) |
| General anxiety                | .44 (.32-.50) | .00 (.00-.09) | .56 (.50-.63) | .26 (.11-.33) | .00 (.00-.00) | .74 (.67-.82) |
| Depression                     | .39 (.24-.45) | .00 (.00-.11) | .61 (.55-.68) | .12 (.00-.22) | .02 (.00-.16) | .86 (.78-.95) |
| Physical activity              | .30 (.10-.47) | .12 (.00-.27) | .58 (.52-.66) | .17 (.00-.34) | .10 (.00-.26) | .74 (.66-.83) |
| Media use                      | .44 (.35-.49) | .00 (.00-.06) | .56 (.51-.62) | .27 (.16-.33) | .00 (.00-.07) | .73 (.67-.81) |
| Volunteering                   | .35 (.26-.41) | .00 (.00-.05) | .65 (.59-.72) | .28 (.19-.36) | .00 (.00-.00) | .72 (.64-.80) |

*Note: Scores were corrected for mean age and sex differences (see Methods).*

**Supplementary Table33.** Model fitting results for univariate analyses of additive genetic (A), shared environmental (C), and non-shared environmental (E) components of variance (95% confidence intervals in parentheses) for variables corrected for variation in living conditions (number of rooms: people in home during the lockdown).

| Construct                      | T2            |               |               | T2 change     |               |               |
|--------------------------------|---------------|---------------|---------------|---------------|---------------|---------------|
|                                | A             | C             | E             | A             | C             | E             |
| Love and relationships         | .23 (.09-.30) | .00 (.00-.10) | .77 (.70-.85) | .15 (.00-.23) | .00 (.00-.13) | .85 (.77-.92) |
| Achievement motivation         | .38 (.21-.44) | .00 (.00-.13) | .62 (.56-.69) | .15 (.00-.23) | .00 (.00-.14) | .85 (.77-.93) |
| Importance of Relationships    | .36 (.21-.42) | .00 (.00-.11) | .64 (.58-.71) | .09 (.00-.17) | .00 (.00-.00) | .91 (.83-.99) |
| Purpose in Life                | .40 (.21-.52) | .06 (.00-.21) | .54 (.48-.61) | .05 (.00-.23) | .09 (.00-.19) | .86 (.77-.93) |
| Healthcare                     | .15 (.00-.29) | .06 (.00-.21) | .79 (.71-.88) | .08 (.00-.20) | .03 (.00-.15) | .89 (.80-.97) |
| Community satisfaction         | .29 (.15-.36) | .00 (.00-.10) | .71 (.64-.78) | .14 (.04-.22) | .00 (.00-.06) | .86 (.78-.94) |
| Attitudes towards money        | .16 (.03-.23) | .00 (.00-.09) | .84 (.77-.91) | .09 (.00-.17) | .00 (.00-.09) | .91 (.83-.99) |
| Alcohol (frequency x quantity) | .40 (.20-.49) | .02 (.00-.18) | .58 (.51-.65) | .20 (.07-.28) | .00 (.00-.00) | .80 (.72-.88) |
| Conduct problems               | .00 (.00-.23) | .18 (.01-.24) | .82 (.74-.88) | .04 (.00-.23) | .10 (.00-.19) | .86 (.77-.93) |
| Emotional problems             | .39 (.19-.45) | .00 (.00-.16) | .61 (.55-.68) | .22 (.10-.30) | .00 (.00-.09) | .78 (.70-.86) |
| Hyperactivity                  | .34 (.25-.41) | .00 (.00-.06) | .66 (.59-.73) | .20 (.00-.28) | .00 (.00-.15) | .80 (.72-.88) |
| Peer problems                  | .36 (.17-.48) | .06 (.00-.22) | .58 (.52-.65) | .18 (.00-.25) | .00 (.00-.17) | .82 (.75-.90) |
| Prosocial behaviour            | .34 (.14-.42) | .01 (.00-.17) | .64 (.58-.72) | .02 (.00-.22) | .11 (.00-.19) | .86 (.78-.93) |

|                   |               |               |               |               |               |               |
|-------------------|---------------|---------------|---------------|---------------|---------------|---------------|
| General anxiety   | .43 (.30-.49) | .00 (.00-.10) | .57 (.51-.63) | .25 (.10-.33) | .00 (.00-.00) | .75 (.67-.83) |
| Depression        | .39 (.23-.45) | .00 (.00-.12) | .61 (.55-.68) | .12 (.00-.22) | .02 (.00-.16) | .86 (.78-.94) |
| Physical activity | .30 (.11-.48) | .11 (.00-.27) | .58 (.52-.65) | .18 (.00-.34) | .09 (.00-.25) | .74 (.66-.83) |
| Media use         | .44 (.36-.50) | .00 (.00-.06) | .56 (.50-.62) | .27 (.16-.34) | .00 (.00-.08) | .73 (.66-.80) |
| Volunteering      | .35 (.26-.42) | .00 (.00-.00) | .65 (.58-.72) | .29 (.19-.36) | .00 (.00-.06) | .71 (.64-.79) |

Note: Scores were corrected for mean age and sex differences (see Methods).

**Supplementary Table 34.** Model fitting results for univariate analyses of additive genetic (A), shared environmental (C), and non-shared environmental (E) components of variance (95% confidence intervals in parentheses) for variables corrected for variation in having been tested or suspected of having COVID-19.

| Construct                   | T2            |               |               | T2 change     |               |               |
|-----------------------------|---------------|---------------|---------------|---------------|---------------|---------------|
|                             | A             | C             | E             | A             | C             | E             |
| Love and relationships      | .23 (.09-.30) | .00 (.00-.10) | .77 (.70-.85) | .15 (.00-.23) | .00 (.00-.00) | .85 (.77-.92) |
| Achievement motivation      | .38 (.22-.44) | .00 (.00-.12) | .62 (.56-.68) | .15 (.00-.23) | .00 (.00-.00) | .85 (.77-.93) |
| Importance of Relationships | .35 (.22-.41) | .00 (.00-.10) | .65 (.59-.71) | .09 (.00-.17) | .00 (.00-.10) | .91 (.83-.99) |
| Purpose in Life             | .41 (.22-.52) | .05 (.00-.20) | .54 (.48-.60) | .06 (.00-.23) | .08 (.00-.19) | .86 (.77-.93) |
| Healthcare                  | .14 (.00-.30) | .08 (.00-.23) | .78 (.70-.87) | .08 (.00-.20) | .03 (.00-.15) | .89 (.80-.97) |
| Community satisfaction      | .30 (.15-.36) | .00 (.00-.00) | .70 (.64-.78) | .15 (.05-.23) | .00 (.00-.06) | .85 (.77-.93) |

|                                |               |               |               |               |               |               |
|--------------------------------|---------------|---------------|---------------|---------------|---------------|---------------|
| Attitudes towards money        | .16 (.03-.23) | .00 (.00-.10) | .84 (.77-.91) | .09 (.00-.17) | .00 (.00-.09) | .91 (.83-.99) |
| Alcohol (frequency x quantity) | .40 (.20-.49) | .03 (.00-.19) | .57 (.51-.65) | .20 (.06-.28) | .00 (.00-.09) | .80 (.72-.89) |
| Conduct problems               | .00 (.00-.22) | .20 (.02-.25) | .80 (.72-.86) | .03 (.00-.23) | .11 (.00-.20) | .86 (.77-.93) |
| Emotional problems             | .38 (.20-.44) | .00 (.00-.14) | .62 (.56-.68) | .21 (.09-.29) | .00 (.00-.08) | .79 (.71-.86) |
| Hyperactivity                  | .33 (.24-.40) | .00 (.00-.06) | .67 (.60-.74) | .20 (.00-.27) | .00 (.00-.16) | .80 (.73-.89) |
| Peer problems                  | .36 (.17-.48) | .06 (.00-.22) | .58 (.52-.65) | .18 (.00-.26) | .00 (.00-.00) | .82 (.74-.90) |
| Prosocial behaviour            | .34 (.14-.42) | .01 (.00-.17) | .64 (.58-.72) | .03 (.00-.23) | .12 (.00-.20) | .85 (.77-.92) |
| General anxiety                | .43 (.31-.49) | .00 (.00-.09) | .57 (.51-.64) | .25 (.10-.33) | .00 (.00-.11) | .75 (.67-.83) |
| Depression                     | .38 (.23-.45) | .00 (.00-.12) | .62 (.55-.69) | .10 (.00-.21) | .03 (.00-.16) | .87 (.79-.95) |
| Physical activity              | .30 (.10-.47) | .12 (.00-.27) | .58 (.52-.66) | .16 (.00-.34) | .10 (.00-.26) | .74 (.66-.83) |
| Media use                      | .44 (.35-.49) | .00 (.00-.06) | .56 (.51-.62) | .26 (.16-.33) | .00 (.00-.08) | .74 (.67-.81) |
| Volunteering                   | .35 (.26-.41) | .00 (.00-.05) | .65 (.59-.72) | .28 (.18-.36) | .00 (.00-.06) | .72 (.64-.80) |

Note: Scores were corrected for mean age and sex differences (see Methods).

**Supplementary Table 35.** Model fitting results for univariate analyses of additive genetic (A), shared environmental (C), and non-shared environmental (E) components of variance for variables (95% confidence intervals in parentheses) corrected for variation in number of COVID-19 symptoms.

| Construct | T2 |   |   | T2 change |   |   |
|-----------|----|---|---|-----------|---|---|
|           | A  | C | E | A         | C | E |
|           |    |   |   |           |   |   |

|                                |               |               |               |               |               |               |
|--------------------------------|---------------|---------------|---------------|---------------|---------------|---------------|
| Love and relationships         | .23 (.08-.30) | .00 (.00-.10) | .77 (.70-.85) | .15 (.00-.23) | .00 (.00-.00) | .85 (.77-.93) |
| Achievement motivation         | .38 (.22-.44) | .00 (.00-.00) | .62 (.56-.68) | .15 (.00-.23) | .00 (.00-.14) | .85 (.77-.94) |
| Importance of Relationships    | .35 (.22-.41) | .00 (.00-.10) | .65 (.59-.71) | .09 (.00-.17) | .00 (.00-.00) | .91 (.83-.99) |
| Purpose in Life                | .38 (.19-.51) | .07 (.00-.22) | .55 (.49-.62) | .03 (.00-.22) | .10 (.00-.18) | .87 (.78-.94) |
| Healthcare                     | .14 (.00-.30) | .08 (.00-.23) | .78 (.70-.87) | .09 (.00-.20) | .03 (.00-.15) | .88 (.80-.97) |
| Community satisfaction         | .29 (.15-.36) | .00 (.00-.00) | .71 (.64-.78) | .14 (.05-.22) | .00 (.00-.00) | .86 (.78-.94) |
| Attitudes towards money        | .16 (.03-.23) | .00 (.00-.00) | .84 (.77-.91) | .09 (.00-.17) | .00 (.00-.09) | .91 (.83-.99) |
| Alcohol (frequency x quantity) | .41 (.21-.49) | .02 (.00-.18) | .57 (.51-.65) | .20 (.06-.28) | .00 (.00-.00) | .80 (.72-.89) |
| Conduct problems               | .00 (.00-.23) | .19 (.01-.25) | .81 (.72-.87) | .04 (.00-.23) | .10 (.00-.19) | .86 (.77-.93) |
| Emotional problems             | .37 (.17-.43) | .00 (.00-.16) | .63 (.57-.71) | .20 (.07-.28) | .00 (.00-.09) | .80 (.72-.88) |
| Hyperactivity                  | .33 (.23-.39) | .00 (.00-.06) | .67 (.61-.74) | .20 (.00-.27) | .00 (.00-.16) | .80 (.73-.89) |
| Peer problems                  | .35 (.15-.48) | .07 (.00-.23) | .58 (.52-.65) | .18 (.00-.25) | .00 (.00-.18) | .82 (.75-.91) |
| Prosocial behaviour            | .34 (.14-.42) | .01 (.00-.17) | .64 (.58-.72) | .03 (.00-.23) | .12 (.00-.20) | .85 (.77-.92) |
| General anxiety                | .41 (.27-.47) | .00 (.00-.11) | .59 (.53-.66) | .25 (.08-.32) | .00 (.00-.12) | .75 (.68-.84) |
| Depression                     | .37 (.21-.43) | .00 (.00-.00) | .63 (.57-.70) | .09 (.00-.20) | .03 (.00-.16) | .88 (.80-.96) |
| Physical activity              | .30 (.10-.47) | .12 (.00-.27) | .58 (.52-.66) | .17 (.00-.34) | .10 (.00-.26) | .74 (.66-.83) |
| Media use                      | .44 (.35-.49) | .00 (.00-.06) | .56 (.51-.62) | .26 (.16-.33) | .00 (.00-.08) | .74 (.67-.81) |

|              |               |               |               |               |               |               |
|--------------|---------------|---------------|---------------|---------------|---------------|---------------|
| Volunteering | .35 (.26-.41) | .00 (.00-.00) | .65 (.59-.72) | .28 (.19-.36) | .00 (.00-.06) | .72 (.64-.79) |
|--------------|---------------|---------------|---------------|---------------|---------------|---------------|

Note: Scores were corrected for mean age and sex differences (see Methods).

**Supplementary Table 36.** Model fitting results for univariate analyses of additive genetic (A), shared environmental (C), and non-shared environmental (E) components of variance for variables (95% confidence intervals in parentheses) for variables corrected for variation in number of COVID-19 symptoms (two or more) vs none.

| Construct                      | T2            |               |               | T2 change     |               |                |
|--------------------------------|---------------|---------------|---------------|---------------|---------------|----------------|
|                                | A             | C             | E             | A             | C             | E              |
| Love and relationships         | .27 (.08-.35) | .00 (NA-NA)   | .73 (.65-.82) | .22 (.00-.30) | .00 (.00-.00) | .78 (.70-.87)  |
| Achievement motivation         | .32 (.08-.45) | .06 (.00-.25) | .62 (.55-.71) | .04 (.00-.21) | .07 (.00-.17) | .89 (.79-.97)  |
| Importance of Relationships    | .35 (.16-.42) | .00 (.00-.15) | .65 (.58-.72) | .07 (.00-.15) | .00 (.00-.00) | .93 (.85-1.00) |
| Purpose in Life                | .27 (.05-.49) | .17 (.00-.34) | .56 (.49-.64) | .00 (.00-.19) | .14 (.00-.21) | .86 (.78-.93)  |
| Healthcare                     | .09 (.00-.26) | .06 (.00-.20) | .84 (.74-.94) | .00 (.00-.00) | .05 (.00-.12) | .95 (.85-1.00) |
| Community satisfaction         | .29 (.07-.37) | .00 (.00-.17) | .71 (.63-.80) | .15 (.01-.24) | .00 (.00-.10) | .85 (.76-.94)  |
| Attitudes towards money        | .19 (.03-.27) | .00 (NA-NA)   | .81 (.73-.90) | .11 (.00-.20) | .00 (.00-.00) | .89 (.80-.98)  |
| Alcohol (frequency x quantity) | .28 (.05-.47) | .12 (.00-.30) | .60 (.53-.69) | .21 (.00-.30) | .00 (.00-.16) | .79 (.70-.89)  |
| Conduct problems               | .01 (.00-.27) | .18 (.00-.25) | .82 (.71-.89) | .12 (.00-.25) | .03 (.00-.18) | .85 (.75-.96)  |

|                     |               |               |               |               |               |               |
|---------------------|---------------|---------------|---------------|---------------|---------------|---------------|
| Emotional problems  | .20 (.00-.39) | .11 (.00-.29) | .69 (.61-.78) | .18 (.00-.26) | .00 (.00-.00) | .82 (.74-.92) |
| Hyperactivity       | .33 (.19-.40) | .00 (.00-.10) | .67 (.60-.75) | .13 (.00-.28) | .06 (.00-.22) | .81 (.72-.90) |
| Peer problems       | .37 (.14-.49) | .05 (.00-.23) | .58 (.51-.66) | .15 (.00-.24) | .01 (.00-.18) | .84 (.76-.94) |
| Prosocial behaviour | .36 (.12-.43) | .00 (.00-.19) | .64 (.57-.73) | .13 (.00-.28) | .06 (.00-.21) | .82 (.72-.92) |
| General anxiety     | .39 (.20-.46) | .00 (.00-.00) | .61 (.54-.69) | .27 (.05-.36) | .00 (.00-.16) | .73 (.64-.82) |
| Depression          | .30 (.06-.42) | .04 (.00-.23) | .66 (.58-.75) | .00 (.00-.19) | .10 (.00-.17) | .90 (.81-.97) |
| Physical activity   | .27 (.04-.48) | .15 (.00-.32) | .58 (.51-.67) | .08 (.00-.33) | .16 (.00-.29) | .76 (.66-.85) |
| Media use           | .45 (.34-.51) | .00 (.00-.00) | .55 (.49-.62) | .29 (.13-.36) | .00 (.00-.00) | .71 (.64-.80) |
| Volunteering        | .33 (.22-.41) | .00 (.00-.08) | .67 (.59-.74) | .28 (.15-.36) | .00 (.00-.09) | .72 (.64-.81) |

*Note: Scores were corrected for mean age and sex differences (see Methods).*

### Supplementary Figures

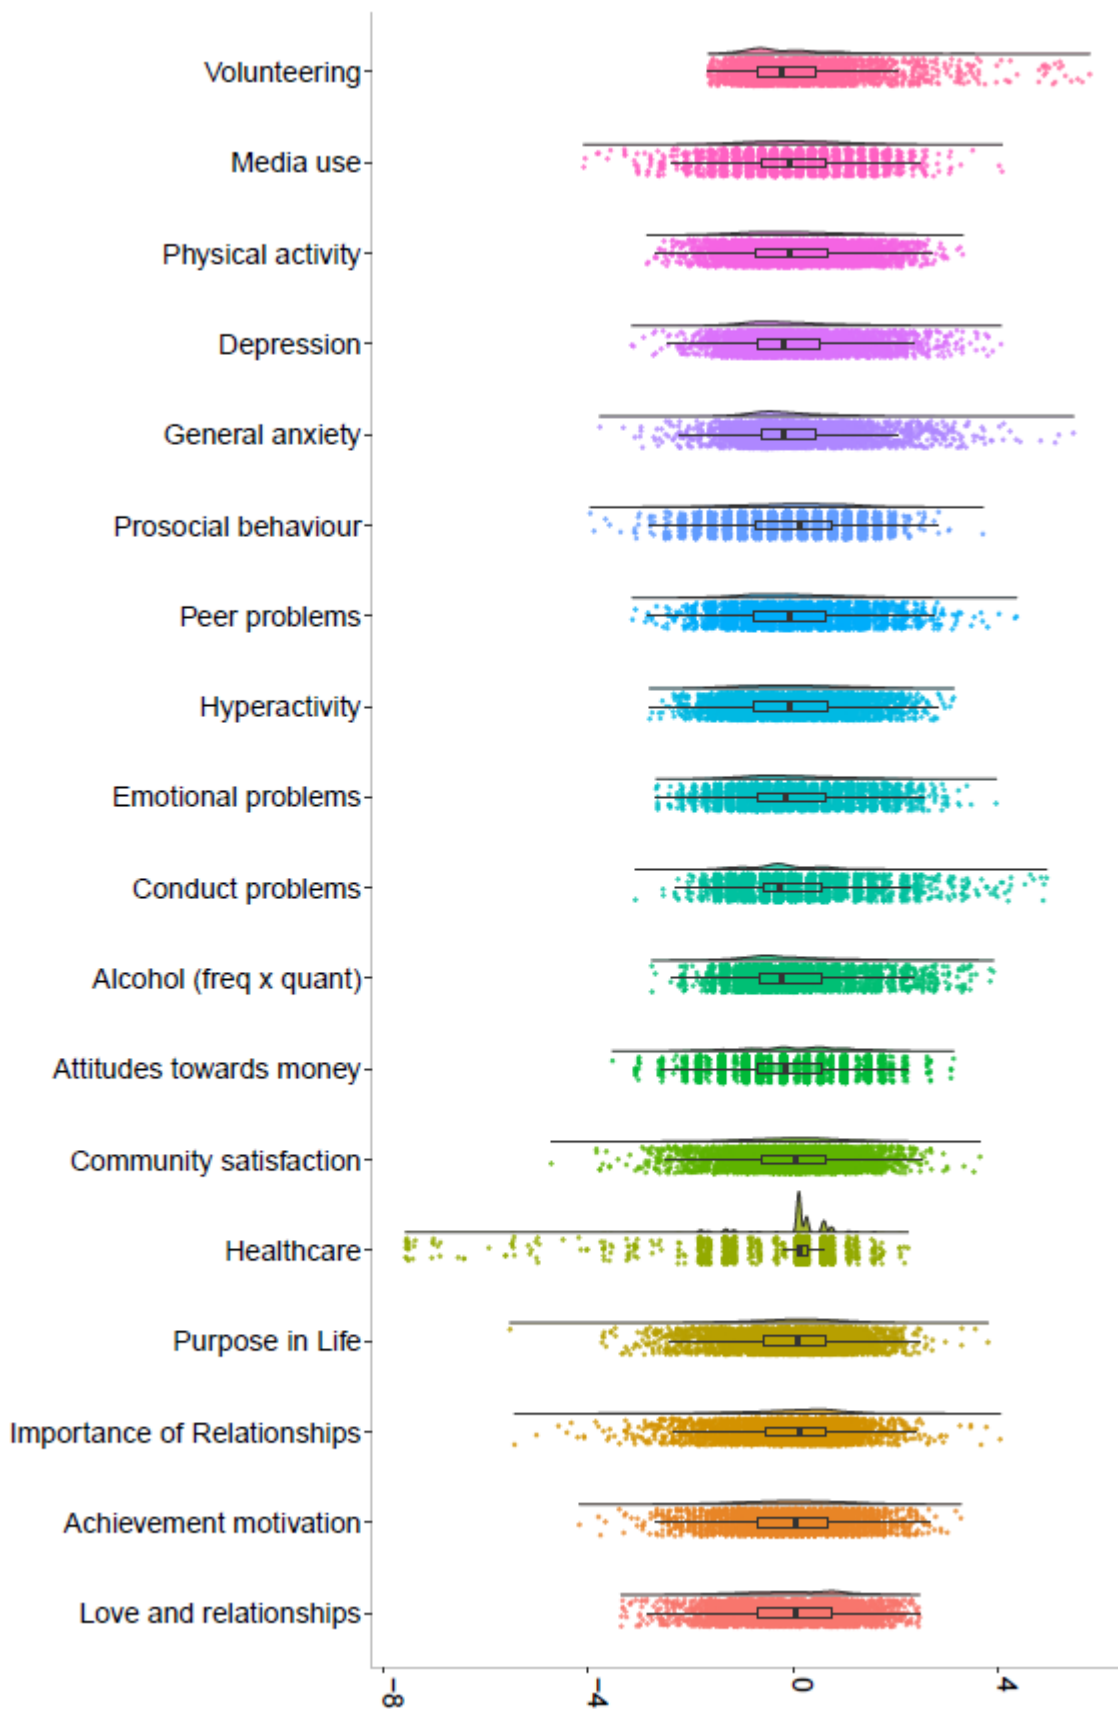

Supplementary Figure 1. Variance in T2 change scores.



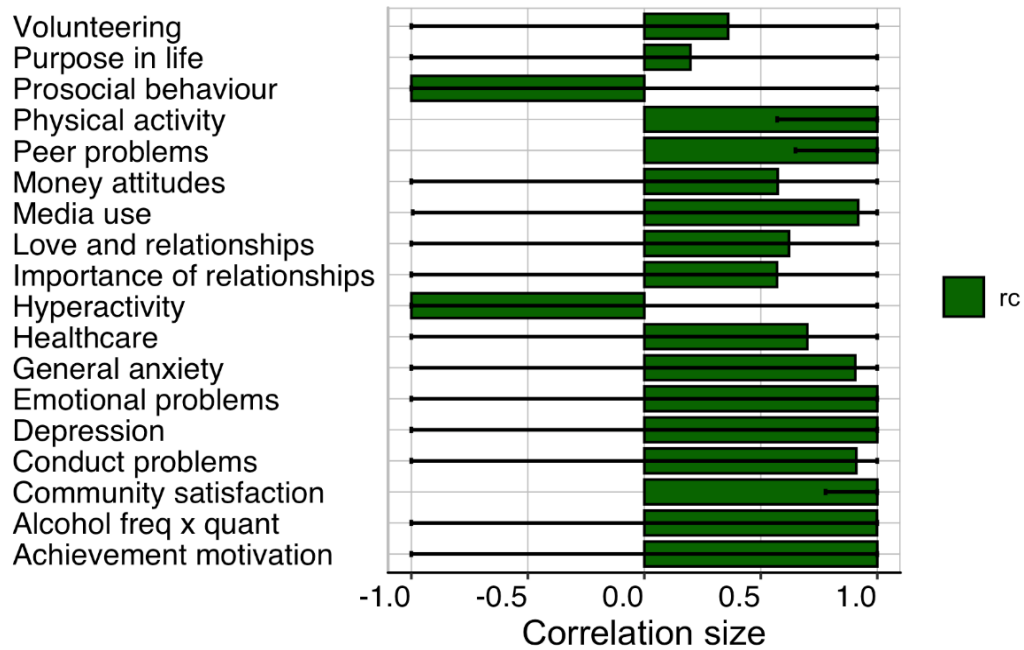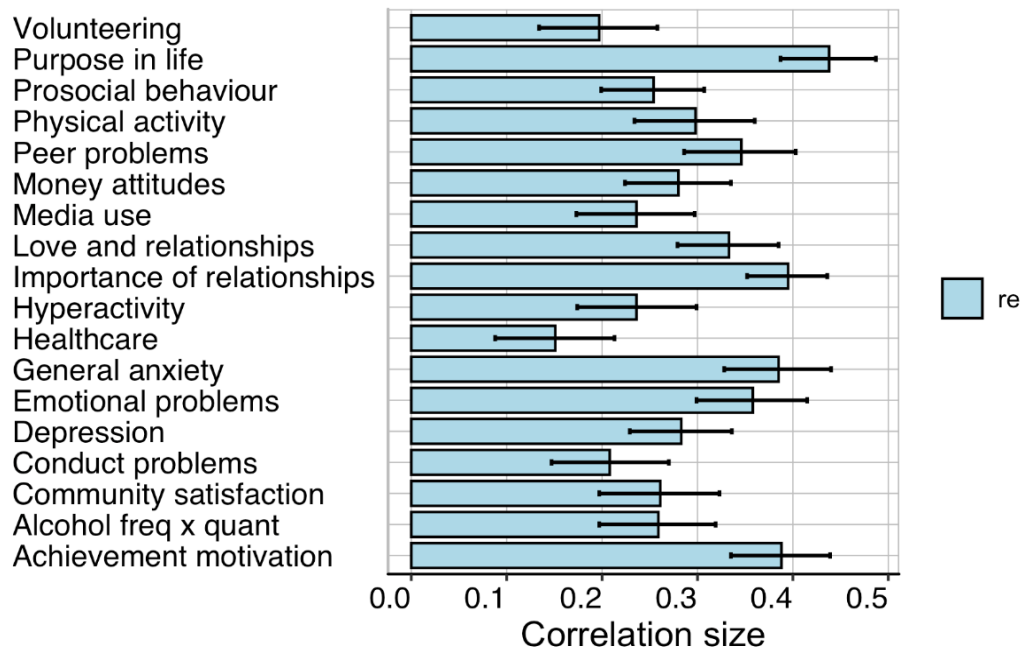

**Supplementary Figure 2.** Shared environmental ( $r_c$ ) and nonshared environmental correlations ( $r_e$ ).

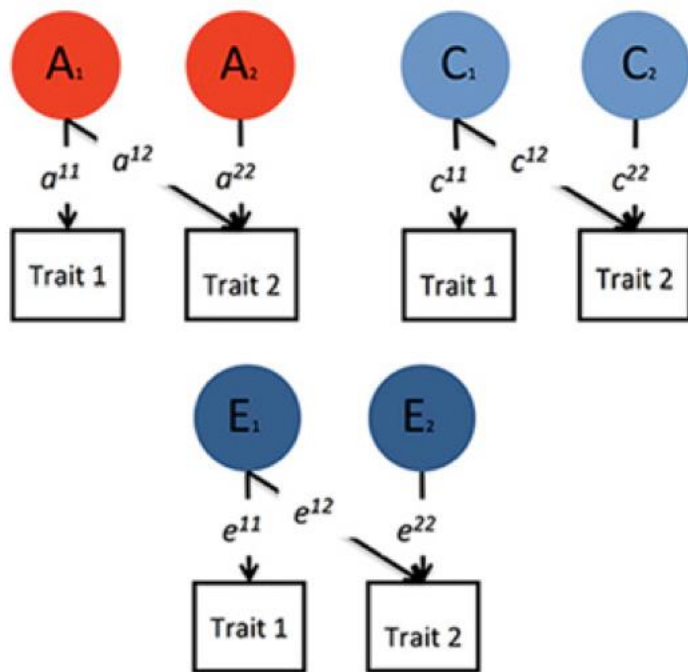

**Supplementary Figure 3.** The Bivariate Cholesky decomposition.
